# Supplementary material for: Selective encapsulation of carboxylic acid dimers within a size-regulable resorcinarene-based hemicarcerand
Source: Royal Society of Chemistry journal article supplement (doi:10.1039/d4cc00699b), 2024-01-01
Supplement: d4cc00699b1.pdf [file d4cc00699b1.pdf]

## Table of Contents

### Supporting Figures

|                   |                                                                                                                                                                                                                |      |
|-------------------|----------------------------------------------------------------------------------------------------------------------------------------------------------------------------------------------------------------|------|
| <b>Figure S1</b>  | $^1\text{H}$ and $^{13}\text{C}\{^1\text{H}\}$ NMR spectra of <b>1Ag</b> in chloroform- $d_1$                                                                                                                  | S3   |
| <b>Figure S2</b>  | DQF-COSY and NOESY of <b>1Ag</b> in chloroform- $d_1$                                                                                                                                                          | S4   |
| <b>Figure S3</b>  | ESI MS of <b>1Ag</b> and observed and simulated isotope patterns of $[\mathbf{1Ag}+\text{BF}_4]^{3+}$                                                                                                          | S5   |
| <b>Figure S4</b>  | $^1\text{H}$ NMR spectra of (a) <b>1+G1a+G2a</b> (b) <b>1+G2a</b> (c) <b>1+G1a</b> in chloroform- $d_1$ at 223 K                                                                                               | S6   |
| <b>Figure S5</b>  | $^1\text{H}$ NMR spectra of (a) <b>1Ag+G1a+G2a</b> (b) <b>1Ag+G2a</b> (c) <b>1Ag+G1a</b> in chloroform- $d_1$ at 223 K                                                                                         | S6   |
| <b>Figure S6</b>  | DQF-COSY of <b>1+G1a</b> in chloroform- $d_1$ at 298 K                                                                                                                                                         | S7   |
| <b>Figure S7</b>  | NOESY of <b>1+G1a</b> in chloroform- $d_1$ at 298 K                                                                                                                                                            | S7   |
| <b>Figure S8</b>  | DQF-COSY of <b>1+G1a</b> in chloroform- $d_1$ at 223 K                                                                                                                                                         | S8   |
| <b>Figure S9</b>  | NOESY of <b>1+G1a</b> in chloroform- $d_1$ at 223 K                                                                                                                                                            | S8   |
| <b>Figure S10</b> | DQF-COSY of <b>1+G2a</b> in chloroform- $d_1$ at 223 K                                                                                                                                                         | S9   |
| <b>Figure S11</b> | NOESY of <b>1+G2a</b> in chloroform- $d_1$ at 223 K                                                                                                                                                            | S9   |
| <b>Figure S12</b> | $^1\text{H}$ NMR spectra of <b>1+G2a</b> in chloroform- $d_1$ at 223 K                                                                                                                                         | S10  |
| <b>Figure S13</b> | $^1\text{H}$ NMR spectra of <b>1+G1b</b> and <b>1+G2b</b> in chloroform- $d_1$ at 223 K                                                                                                                        | S10  |
| <b>Figure S14</b> | DQF-COSY of <b>1Ag+G1a+G2a</b> in chloroform- $d_1$ at 298 K                                                                                                                                                   | S11  |
| <b>Figure S15</b> | NOESY of <b>1Ag+G1a+G2a</b> in chloroform- $d_1$ at 298 K                                                                                                                                                      | S11  |
| <b>Figure S16</b> | DQF-COSY of <b>1Ag+G1a+G2a</b> in chloroform- $d_1$ at 223 K                                                                                                                                                   | S12  |
| <b>Figure S17</b> | NOESY of <b>1Ag+G1a+G2a</b> in chloroform- $d_1$ at 223 K                                                                                                                                                      | S12  |
| <b>Figure S18</b> | $^1\text{H}$ NMR spectra of (a) <b>1</b> , (b) <b>1+AgBF<sub>4</sub></b> , and (c) <b>1+AgBF<sub>4</sub>+NEt<sub>4</sub>I</b>                                                                                  | S13  |
| <b>Figure S19</b> | $^1\text{H}$ NMR spectra of (a) <b>1+G1a+G2a</b> , (b) <b>1+G1a+G2a+AgBF<sub>4</sub></b> , (c) <b>1+G1a+G2a+AgBF<sub>4</sub>+NEt<sub>4</sub>I</b> , and (d) <b>1+G1a+G2a+AgBF<sub>4</sub>+NEt<sub>4</sub>I</b> | S13  |
| <b>Figure S20</b> | Optimized structures of <b>M1Ag</b> at the B3LYP/6-31G(d)+LanL2DZ method                                                                                                                                       | S14  |
| <b>Figure S21</b> | Optimized structures of (a) <b>G1a•G1a•M1Ag</b> (b) <b>G1a•G2a•M1Ag</b> at the B3LYP/6-31G(d)+LanL2DZ method                                                                                                   | S14  |
| <b>Figure S22</b> | Optimized structures of (a) <b>G1a•G2a•M1</b> (b) <b>G2a•G2a•M1</b> at the B3LYP/6-31G(d) method                                                                                                               | S15  |
| <b>Figure S23</b> | $^1\text{H}$ NMR spectra of a mixture of <b>1</b> and <b>G2a</b> in THF- $d_8$ and chloroform- $d_1$                                                                                                           | S15  |
| <b>Table S1</b>   | PDB file of <b>M1Ag</b>                                                                                                                                                                                        | S16  |
| <b>Table S2</b>   | PDB file of <b>G1a•G1a•M1Ag</b>                                                                                                                                                                                | S47  |
| <b>Table S3</b>   | PDB file of <b>G1a•G2a•M1Ag</b>                                                                                                                                                                                | S79  |
| <b>Table S4</b>   | PDB file of <b>G1a•G2a•M1</b>                                                                                                                                                                                  | S112 |
| <b>Table S5</b>   | PDB file of <b>G2a•G2a•M1</b>                                                                                                                                                                                  | S145 |

## General

All chemicals and solvents were purchased from Kanto Chemical Co., Ltd., Wako Pure Chemical Co., Ltd., Tokyo Kasei Kogyo Co., Ltd., and Sigma-Aldrich Co., Ltd., and were used as received without further purification. NMR spectra were recorded on a Bruker APEX 400 MHz spectrometer, a JEOL ECA-500 MHz spectrometer. Chemical shifts are quoted as parts per million (ppm) relative to chloroform (chloroform- $d_1$ ,  $\delta = 7.26$  ppm for  $^1\text{H}$  and 77.16 ppm for  $^{13}\text{C}\{^1\text{H}\}$ ). IR spectra were recorded on a JASCO FT/IR-4600 spectrometer.

## Computational Methods

The geometry optimizations of the host-guest complexes were carried out by the Gaussian 16 Rev. C01. program using B3LYP/6-31G(d)+LanL2DZ level with gd3 correlation. The light atoms (C, H, N, O) were treated by the 6-31G(d) basis set and the heavy atoms (Ag) were treated by the LanL2DZ basis set. The long alkyl chains on the lower rim of the cavitands were replaced with hydrogen atoms for the calculations. The optimized structures are shown in Figures S20-S22. The atomic coordinates of the optimized structures are listed in Tables S1-5.

## X-ray crystallography

## Synthesis of Capsule 1Ag

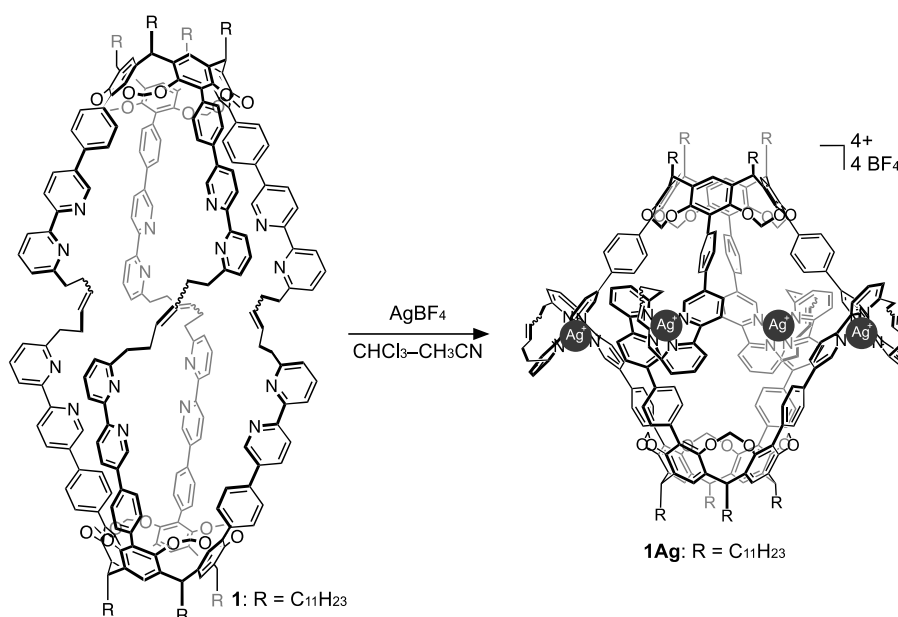

**1** (28 mg, 6.2  $\mu\text{mol}$ ) was dissolved in chloroform (1 mL). To this solution,  $\text{AgBF}_4$  (5.1 g, 26  $\mu\text{mol}$ ) in acetonitrile (0.5 mL) was added. The mixture was stirred at room temperature for 30 min and evaporated under reduced pressure to give the product (32 mg, 6.1  $\mu\text{mol}$ ) in quantitative yield as brown solid.

M.p. >300  $^\circ\text{C}$ ;  $^1\text{H}$  NMR (500 MHz, chloroform- $d_1$ , 293 K):  $\delta$  9.02 (d, 8H,  $J = 8.3$  Hz), 8.80 (d, 8H,  $J = 8.0$  Hz), 8.42 (s, 8H), 8.26 (dd, 8H,  $J = 8.3$  Hz,  $J = 1.5$  Hz), 8.14 (t, 8H,  $J = 8.0$  Hz), 7.43 (d, 8H,  $J = 8.0$  Hz), 7.32 (d, 16H,  $J = 8.0$  Hz), 7.29 (s, 8H), 7.06 (d, 16H,  $J = 8.0$  Hz), 5.32 (d, 8H,  $J = 7.0$  Hz), 5.17 (s, 8H), 4.83 (t, 8H,  $J = 8.0$  Hz), 4.23 (d, 8H,  $J = 7.0$  Hz), 3.27 (m, 8H), 2.80 (m, 8H), 2.05 (br, 8H), 2.41–2.21, 1.53–1.15, 0.95–0.84 (br, 192 H) ppm;  $^{13}\text{C}\{^1\text{H}\}$  NMR (125 MHz, chloroform- $d_1$ , 293 K):  $\delta$  160.1, 152.7, 152.4, 150.9, 150.7, 148.7, 140.3, 138.8, 138.6, 138.3, 136.1, 133.6, 131.2, 131.1, 131.1, 128.0, 127.0, 124.5, 121.7, 120.3, 100.8, 44.8, 37.3, 32.5, 32.1, 30.6, 30.0, 29.9, 29.5, 28.1, 22.8, 14.2 ppm; IR (KBr):  $\nu$  2925, 2853, 1972, 1596, 1574, 1454, 1400, 1369, 1306, 1258, 1156, 1082, 1022, 972, 809, 755, 584  $\text{cm}^{-1}$ ; HRMS (ESI+): calcd for  $\text{C}_{304}\text{H}_{336}\text{N}_{16}\text{O}_{16}\text{Ag}_4\text{BF}_4$   $m/z$  1660.40622 [ $\text{M}]^{3+}$ , found  $m/z$  1660.40665.

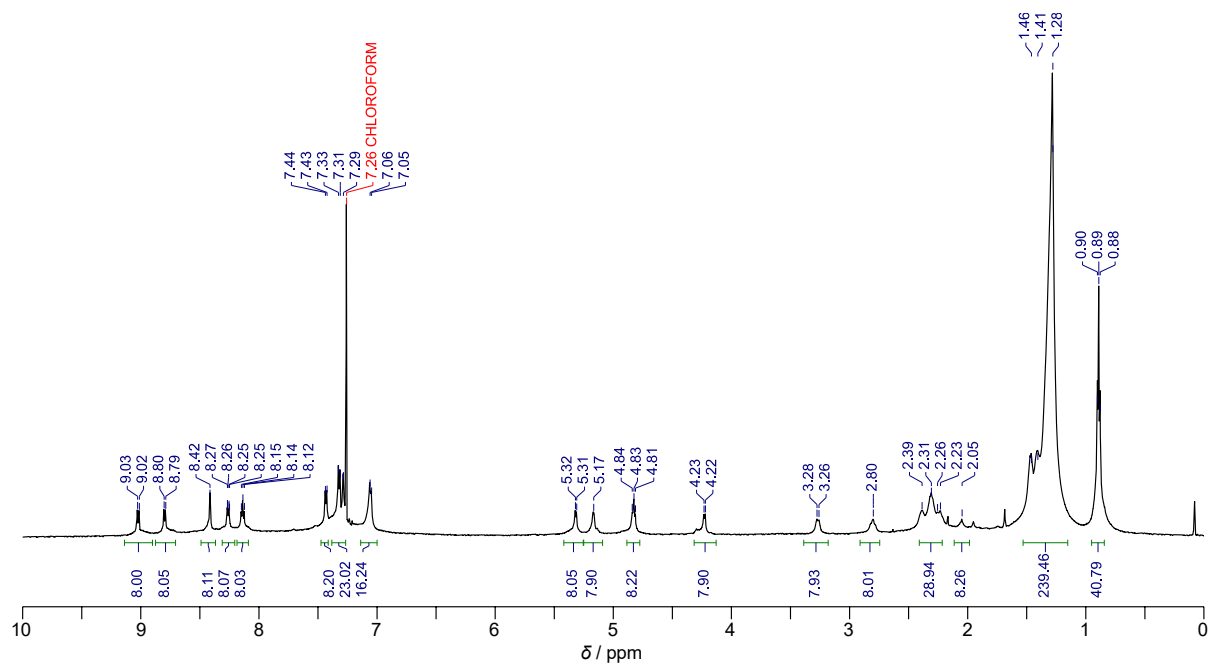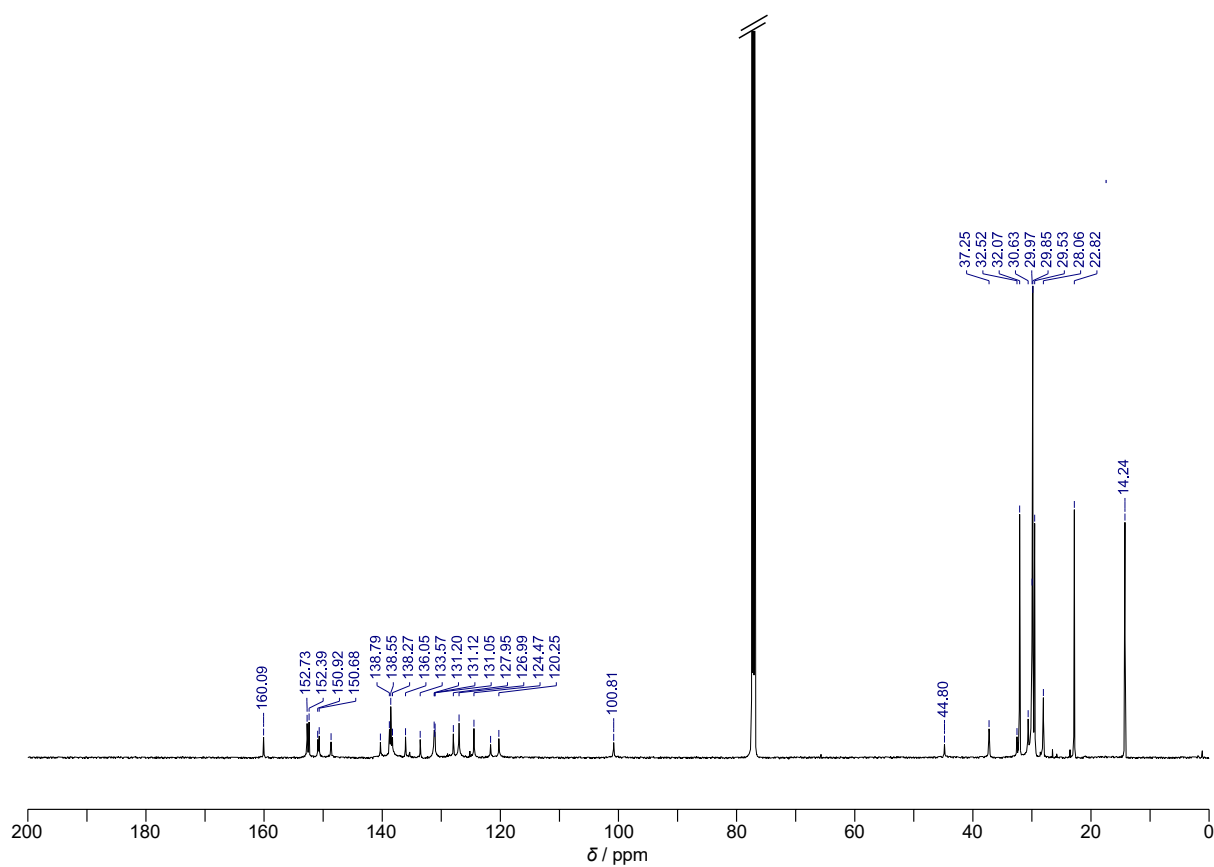

**Figure S1.** <sup>1</sup>H (500 MHz, chloroform-*d*<sub>1</sub>, 298 K) and <sup>13</sup>C{<sup>1</sup>H} (125 MHz, chloroform-*d*<sub>1</sub>, 298 K) NMR spectra of [1Ag](BF<sub>4</sub>)<sub>4</sub>.

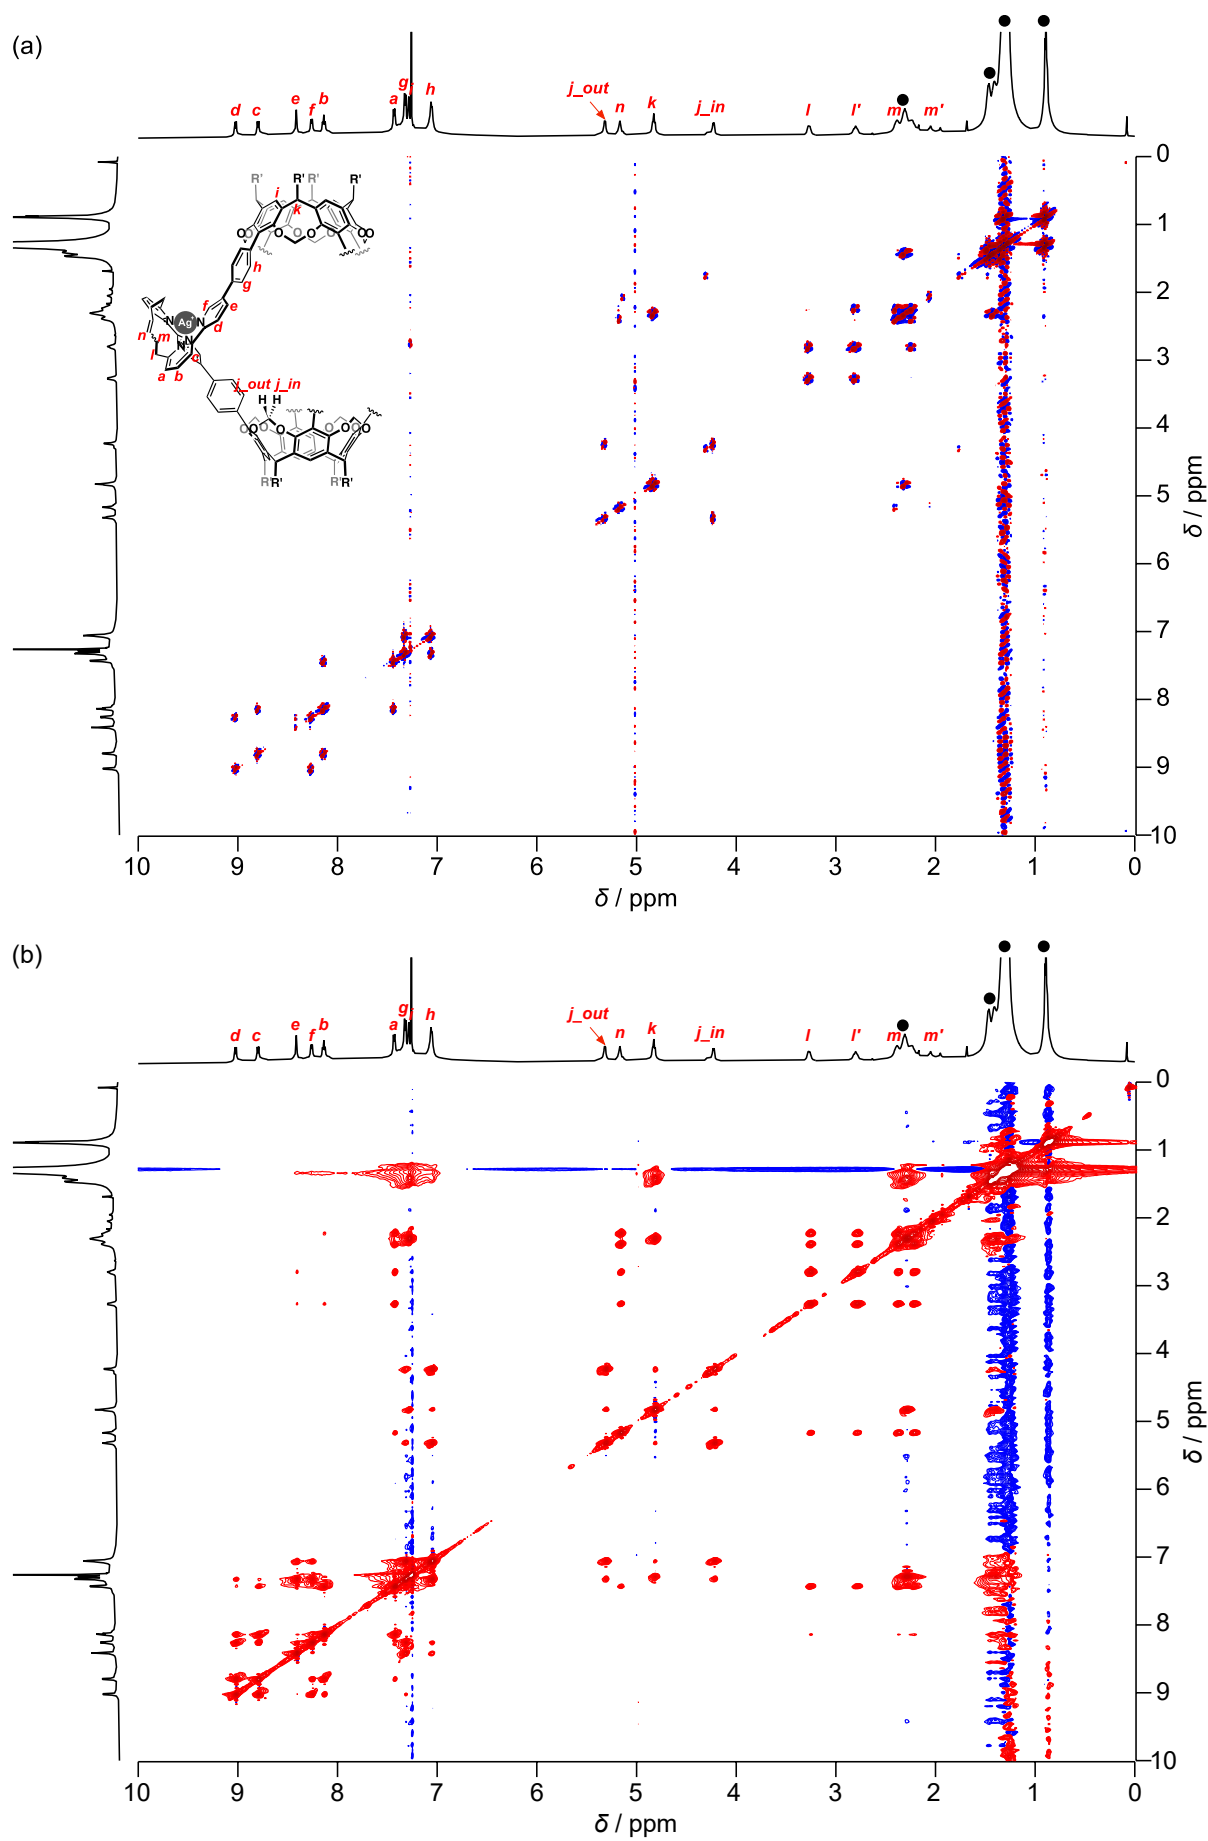

**Figure S2.** (a) DQF-COSY (500 MHz, chloroform- $d_1$ , 298 K) and (b) NOESY (500 MHz, chloroform- $d_1$ , 298 K) of **[1Ag](BF<sub>4</sub>)<sub>4</sub>**. Mixing time = 500 ms.

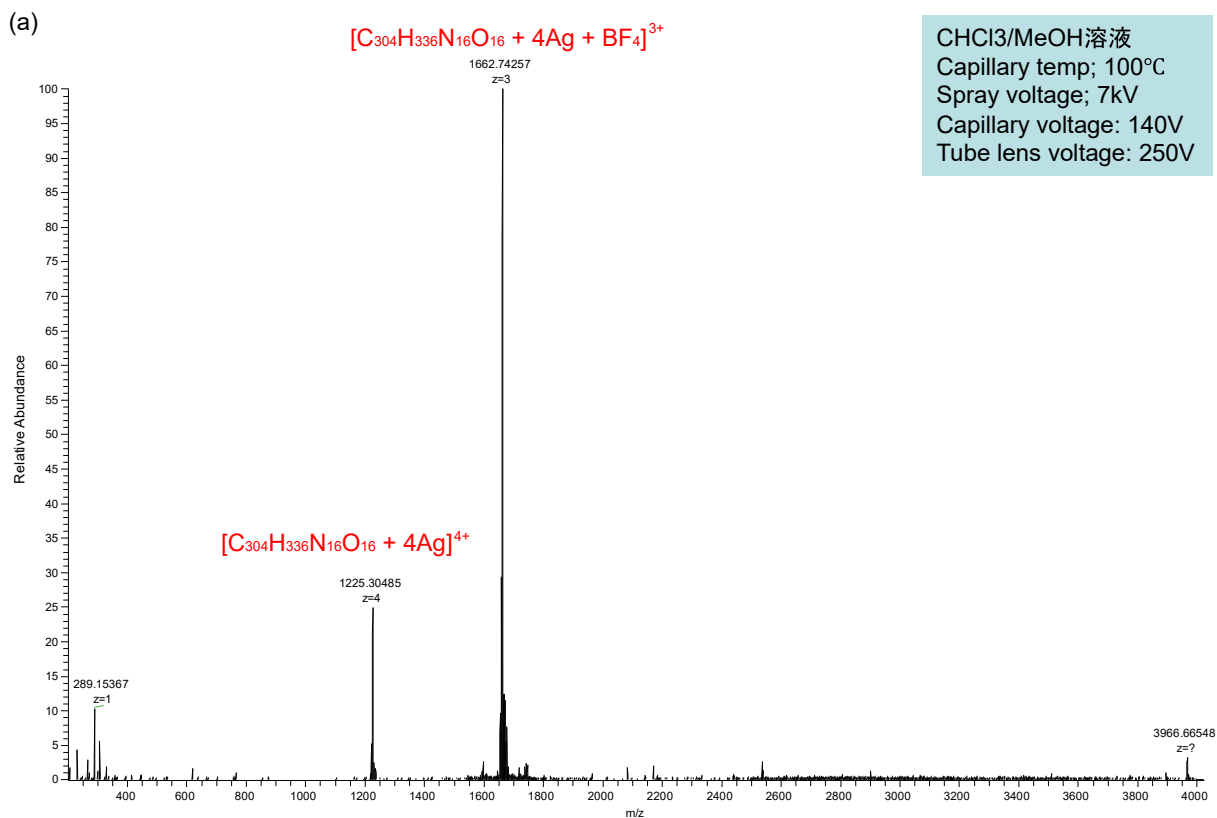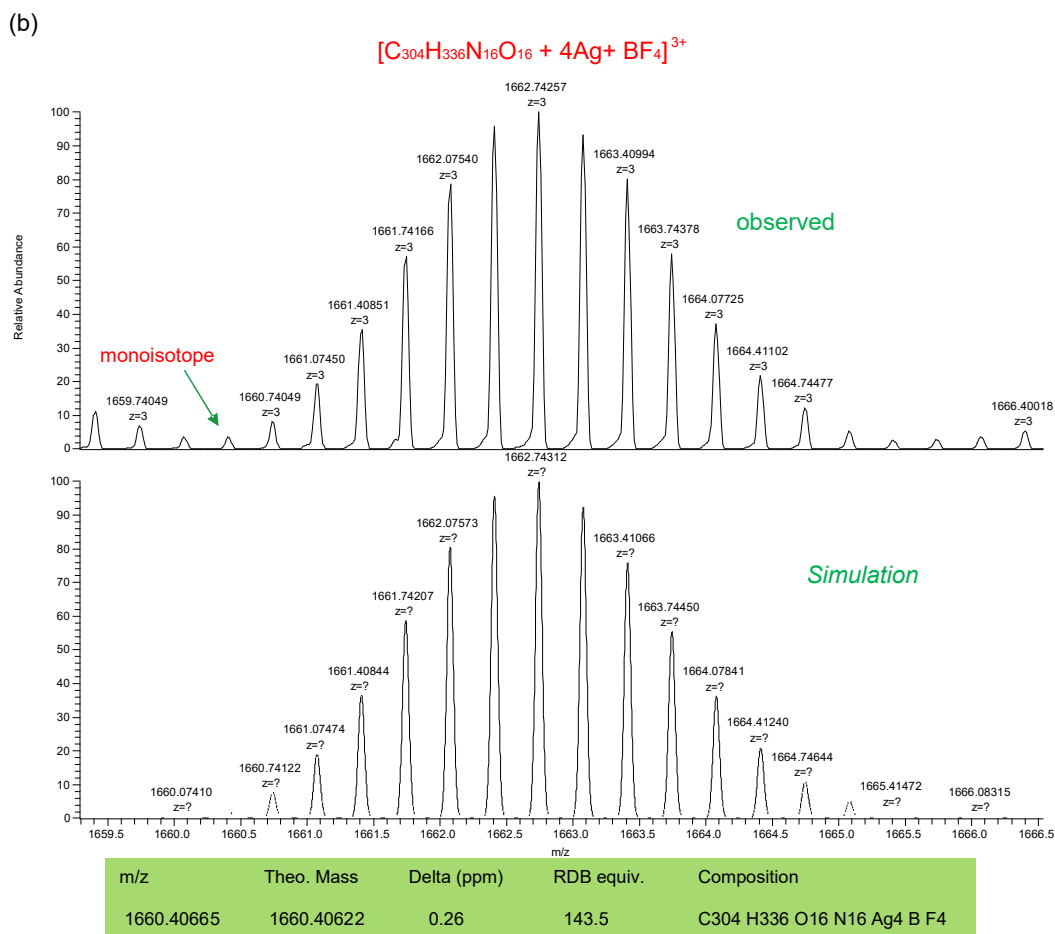

**Figure S3.** (a) ESI MS spectrum of  $[1Ag](BF_4)_4$  and (b) observed and calculated isotope pattern of  $[1Ag+BF_4]^{3+}$ .

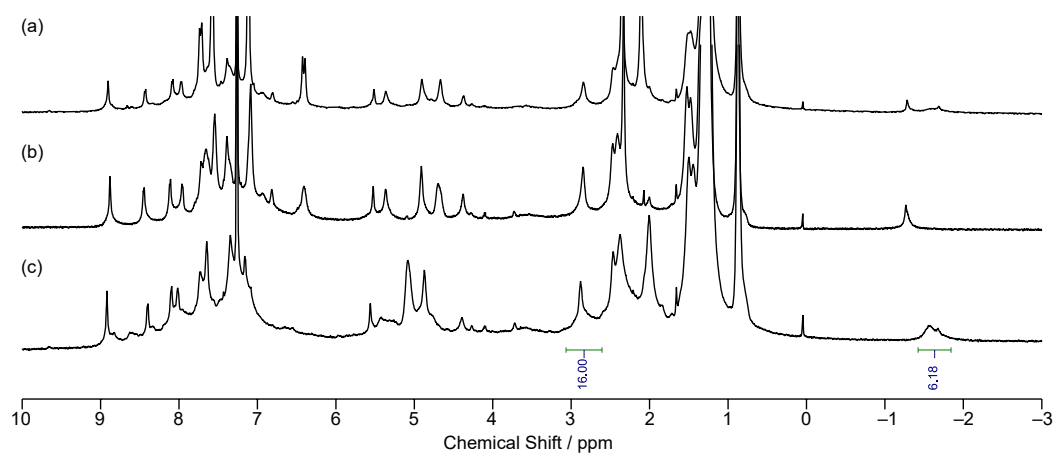

**Figure S4.**  $^1\text{H}$  NMR spectra (500 MHz, chloroform- $d_1$ , 223 K) of the mixture of (a) **1**, **G1a**, and **G2a** and (b) **1** and **G2a**, and (c) **1** and **G1a**. The concentration of **1**, **G1a**, and **G2a** are 1.5 mM, 15 mM, and 15 mM, respectively.

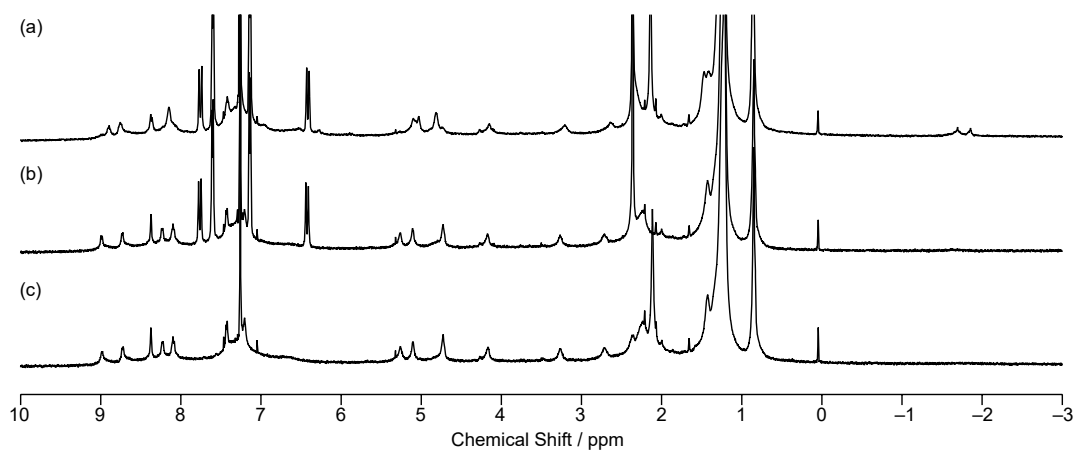

**Figure S5.**  $^1\text{H}$  NMR spectra (500 MHz, chloroform- $d_1$ , 223 K) of the mixture of (a)  $[\text{1Ag}](\text{BF}_4)_4$ , **G1a**, and **G2a** and (b)  $[\text{1Ag}](\text{BF}_4)_4$  and **G2a**, and (c)  $[\text{1Ag}](\text{BF}_4)_4$  and **G1a**. The concentrations of  $[\text{1Ag}](\text{BF}_4)_4$ , **G1a**, and **G2a** are 1.5 mM, 15 mM, and 15 mM, respectively.

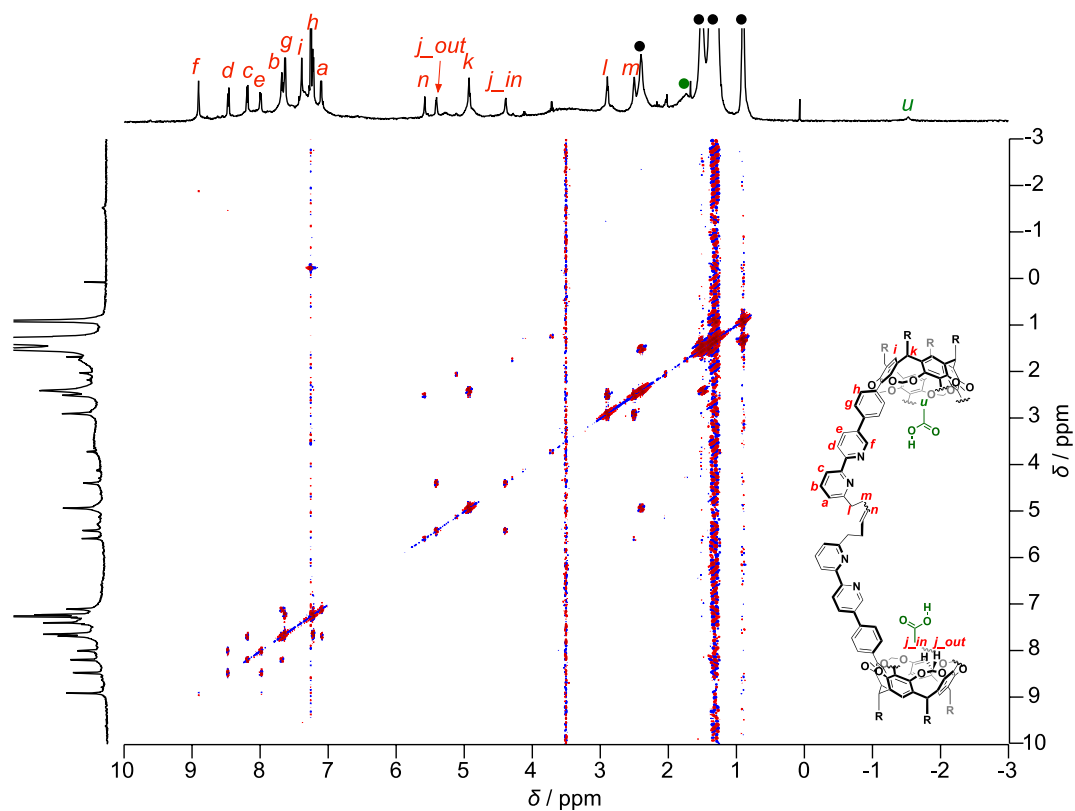

**Figure S6.** DQF-COSY (500 MHz, chloroform- $d_1$ , 298 K) of a mixture of **1** and **G1a**. The concentrations of **1** and **G1a** are 1.5 mM and 15 mM, respectively. Mixing time = 500 ms.

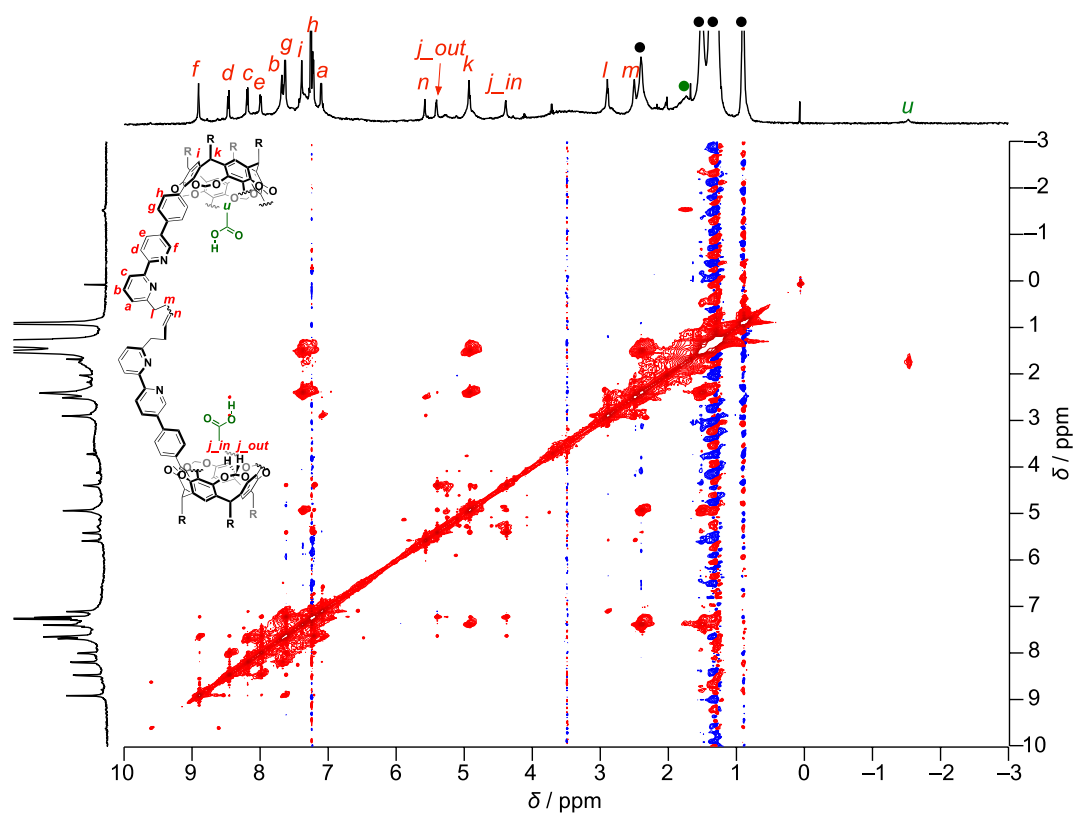

**Figure S7.** NOESY (500 MHz, chloroform- $d_1$ , 298 K) of a mixture of **1** and **G1a**. The concentrations of **1** and **G1a** are 1.5 mM and 15 mM, respectively. Mixing time = 500 ms.

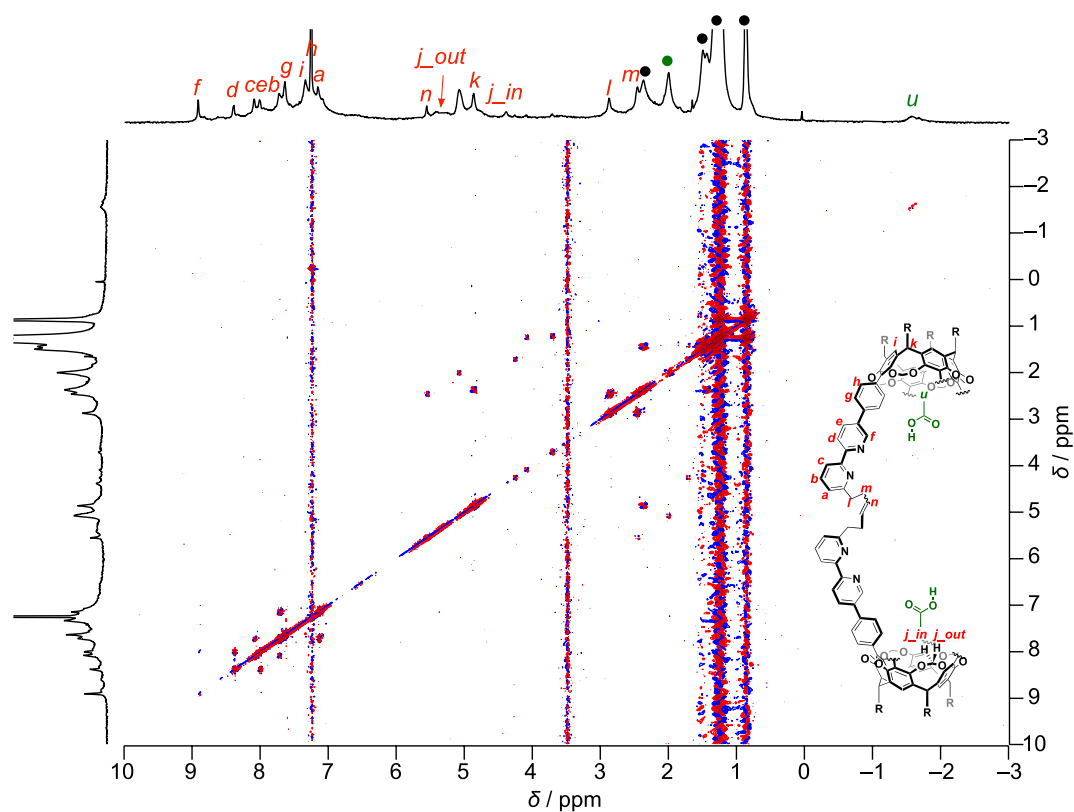

**Figure S8.** DQF-COSY (500 MHz, chloroform- $d_1$ , 223 K) of a mixture of **1** and **G1a**. The concentrations of **1** and **G1a** are 1.5 mM and 15 mM, respectively. Mixing time = 500 ms.

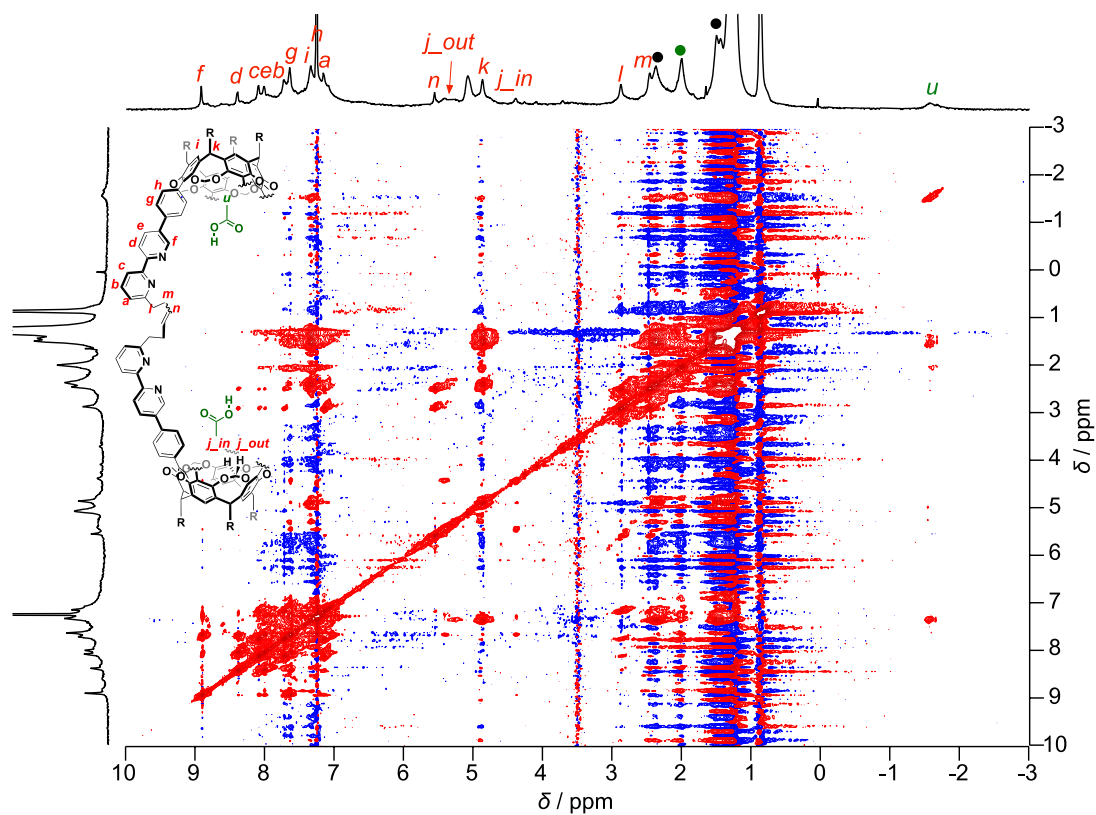

**Figure S9.** (a) NOESY (500 MHz, chloroform- $d_1$ , 223 K) of a mixture of **1** and **G1a**. The concentrations of **1** and **G1a** are 1.5 mM and 15 mM, respectively. Mixing time = 500 ms.



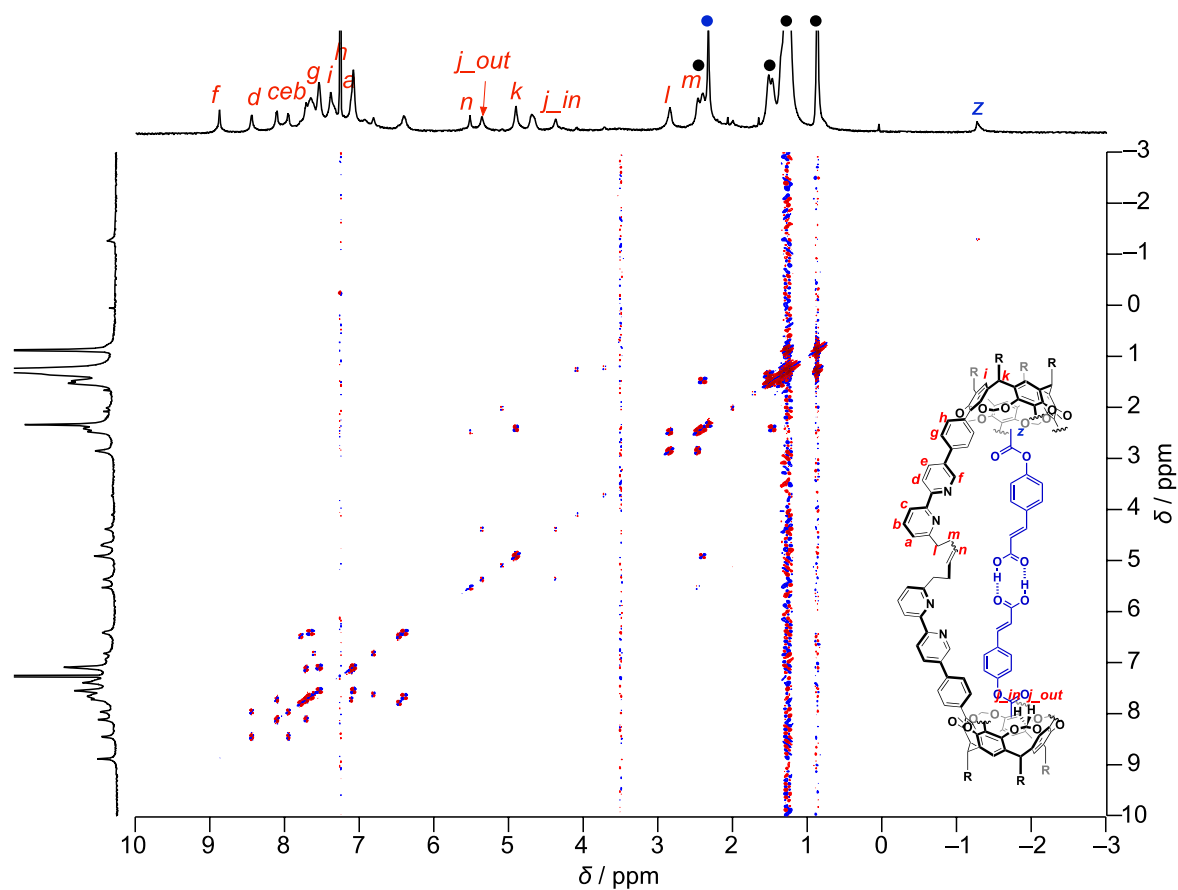

**Figure S10.** COSY (500 MHz, chloroform- $d_1$ , 223 K) of a mixture of **1** and **G2a**. The concentration of **1** and **G2a** are 1.5 mM and 15 mM, respectively. Mixing time = 500 ms.

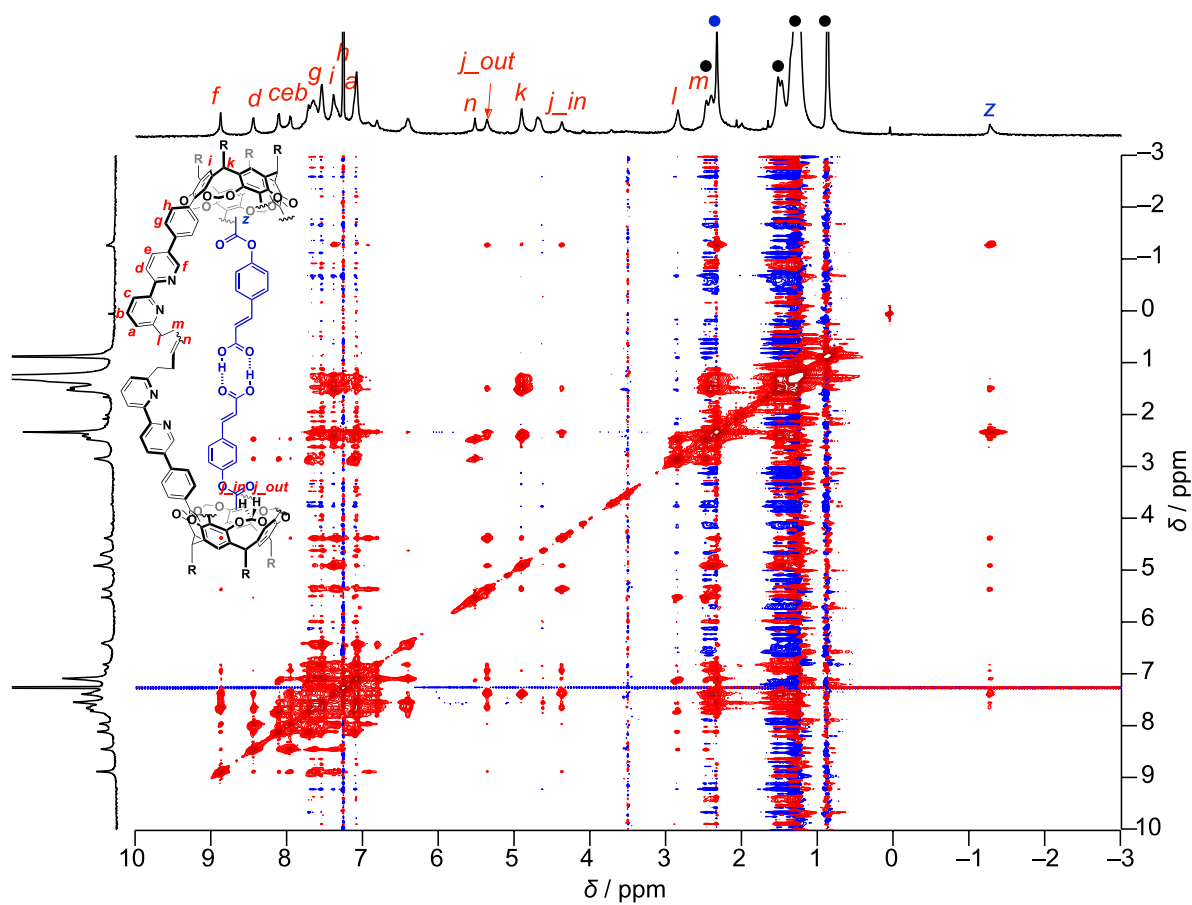

**Figure S11.** NOESY (500 MHz, chloroform- $d_1$ , 223 K) of a mixture of **1** and **G2a**. The concentration of **1** and **G2a** are 1.5 mM and 15 mM, respectively. Mixing time = 500 ms.

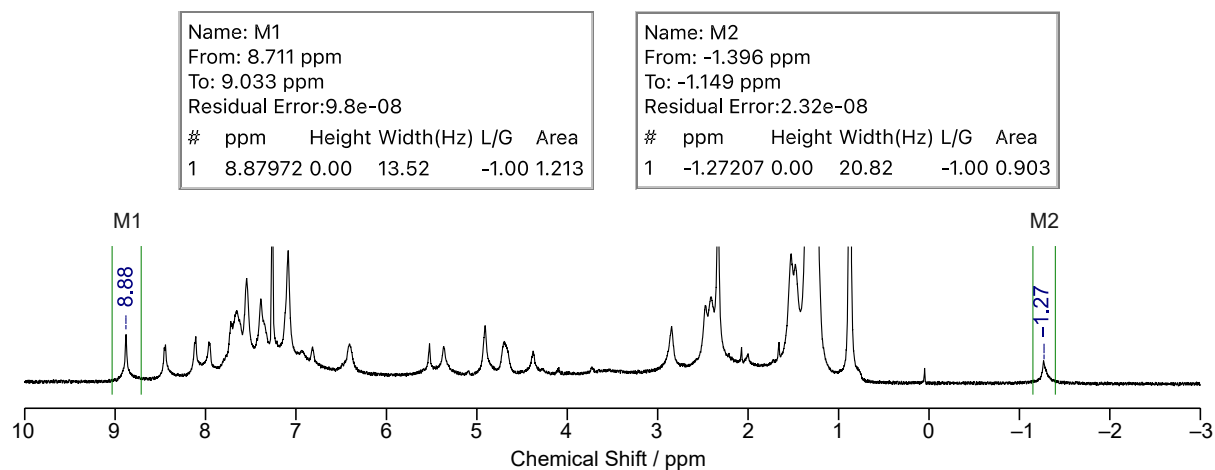

**Figure S12.**  $^1\text{H}$  NMR (500 MHz, chloroform- $d_1$ , 223 K) spectra of **1** (1.5 mM) and **G2a** (15 mM) with the signal intensities of **1** and **G2a**.

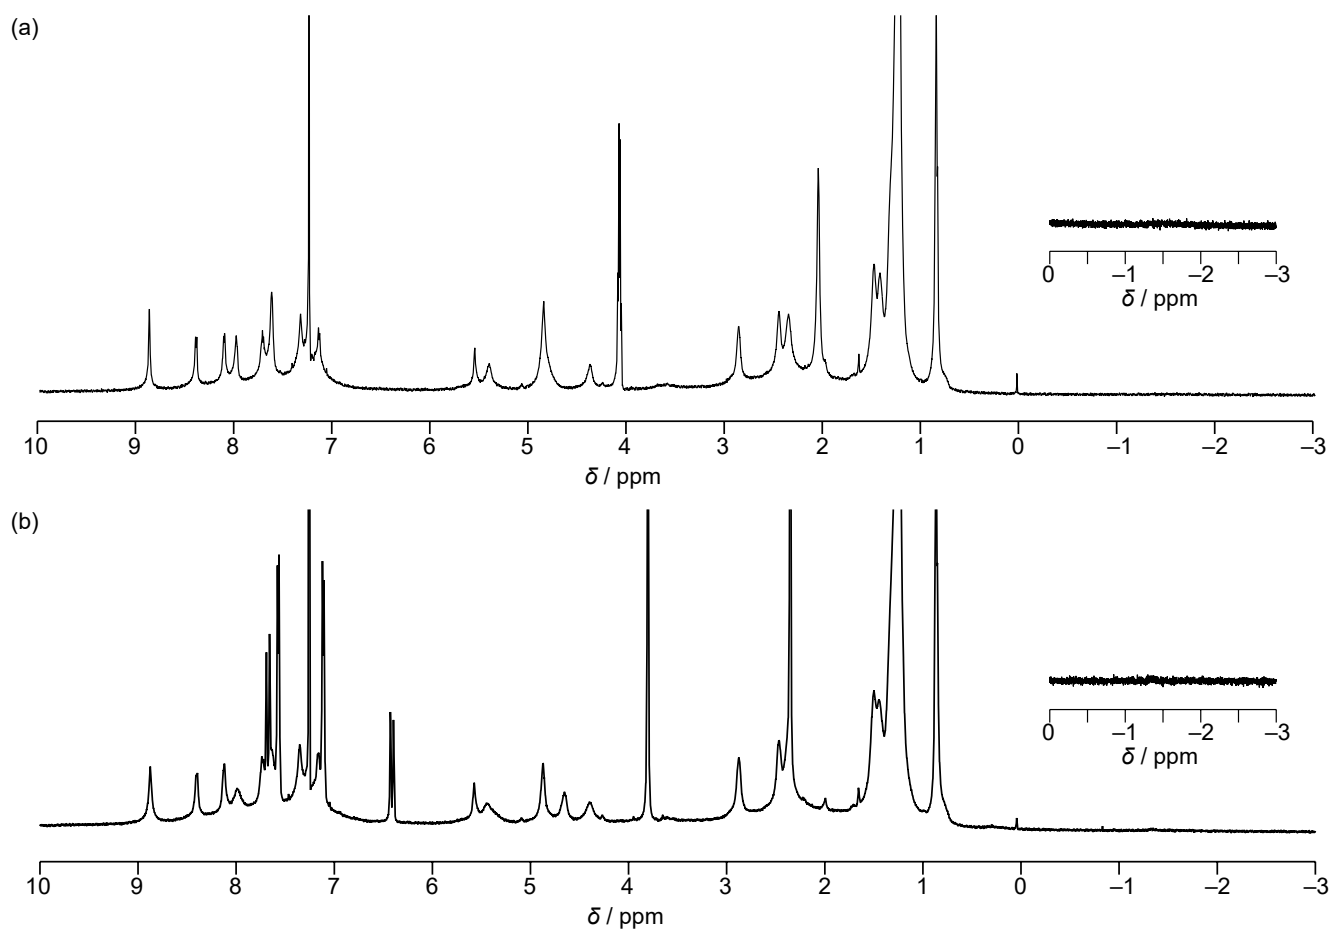

**Figure S13.**  $^1\text{H}$  NMR (500 MHz, chloroform- $d_1$ , 223 K) spectra of **1** (1.5 mM) with (a) **G1b** (10 mM) and (b) **G2b** (15 mM).

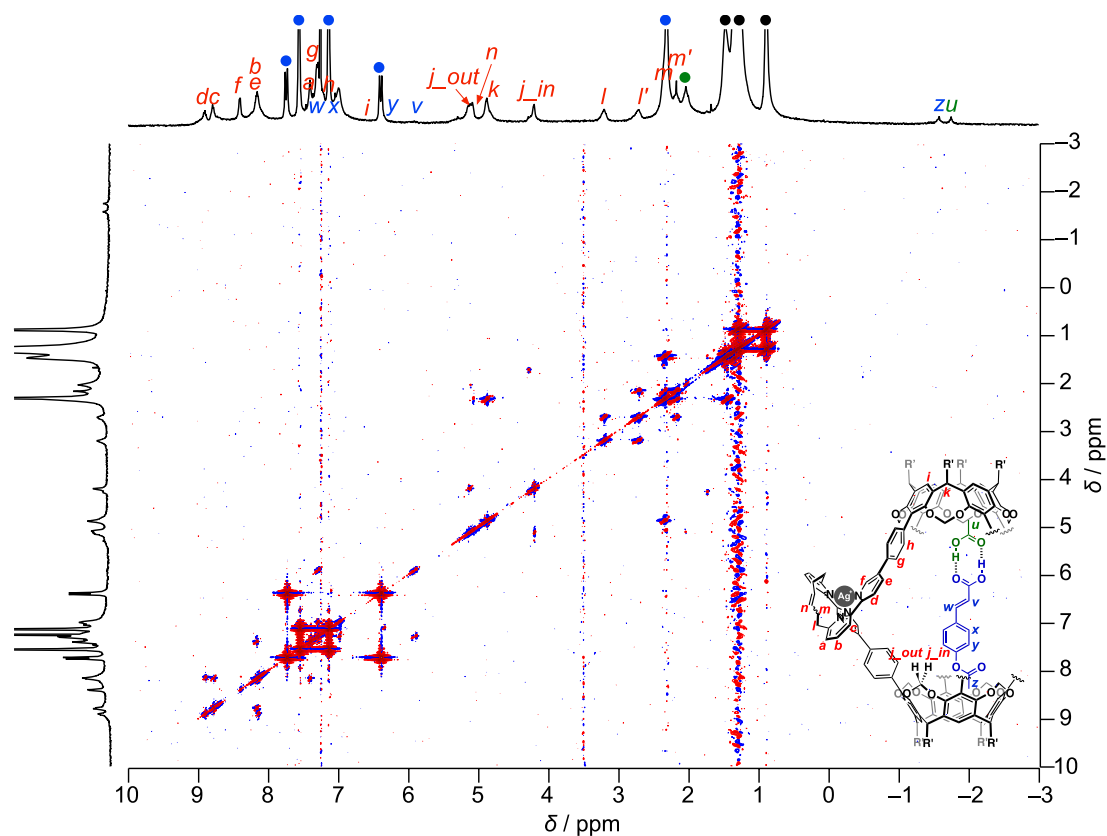

**Figure S14.** DQF-COSY (500 MHz, chloroform- $d_1$ , 298 K) of a mixture of  $[1\text{Ag}](\text{BF}_4)_4$ , **G1a**, and **G2a**. The concentration of  $[1\text{Ag}](\text{BF}_4)_4$ , **G1a**, and **G2a** are 1.5 mM, 15 mM, and 15 mM, respectively. Mixing time = 500 ms.

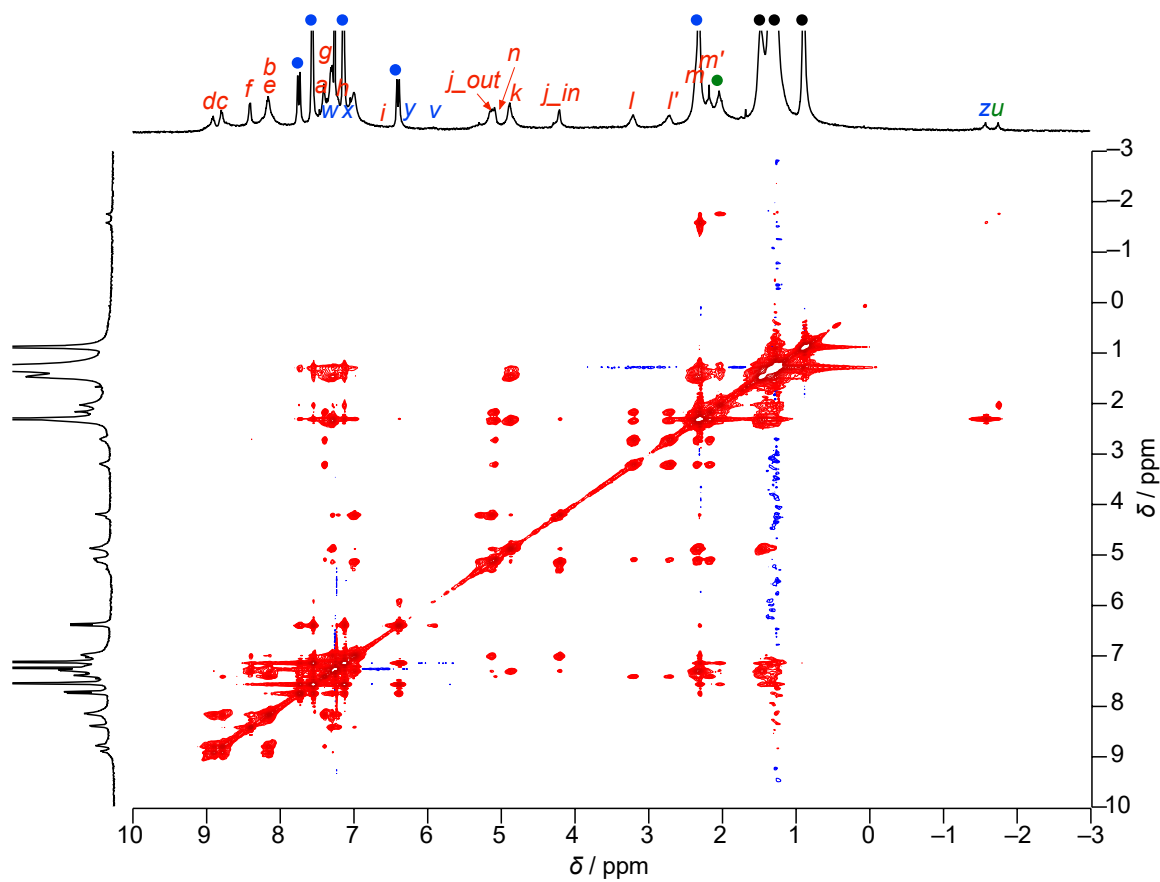

**Figure S15.** NOESY (500 MHz, chloroform- $d_1$ , 298 K) of a mixture of  $[1\text{Ag}](\text{BF}_4)_4$ , **G1a**, and **G2a**. The concentration of  $[1\text{Ag}](\text{BF}_4)_4$ , **G1a**, and **G2a** are 1.5 mM, 15 mM, and 15 mM, respectively. Mixing time = 500 ms.

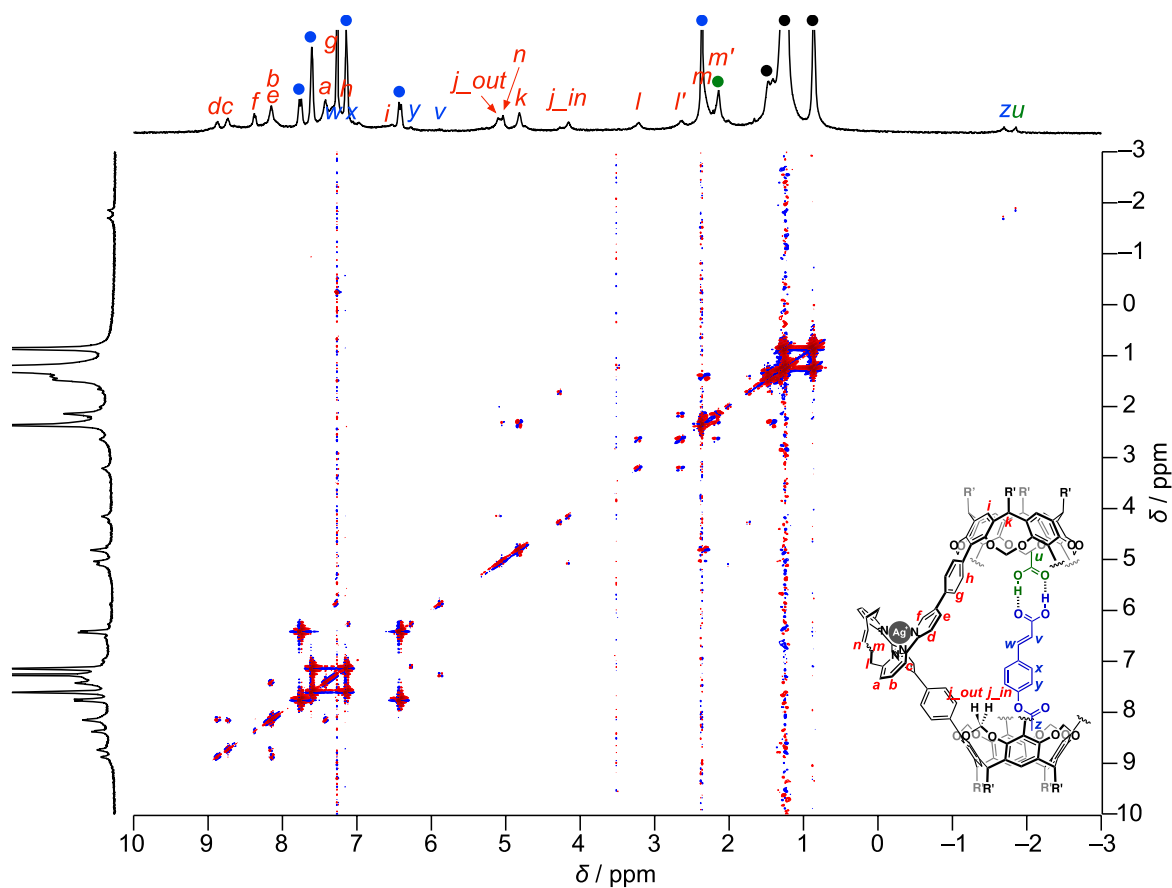

**Figure S16.** DQF-COSY (500 MHz, chloroform- $d_3$ , 223 K) of a mixture of  $[1\text{Ag}](\text{BF}_4)_4$ , **G1a**, and **G2a**. The concentration of  $[1\text{Ag}](\text{BF}_4)_4$ , **G1a**, and **G2a** are 1.5 mM, 15 mM, and 15 mM, respectively. Mixing time = 500 ms.

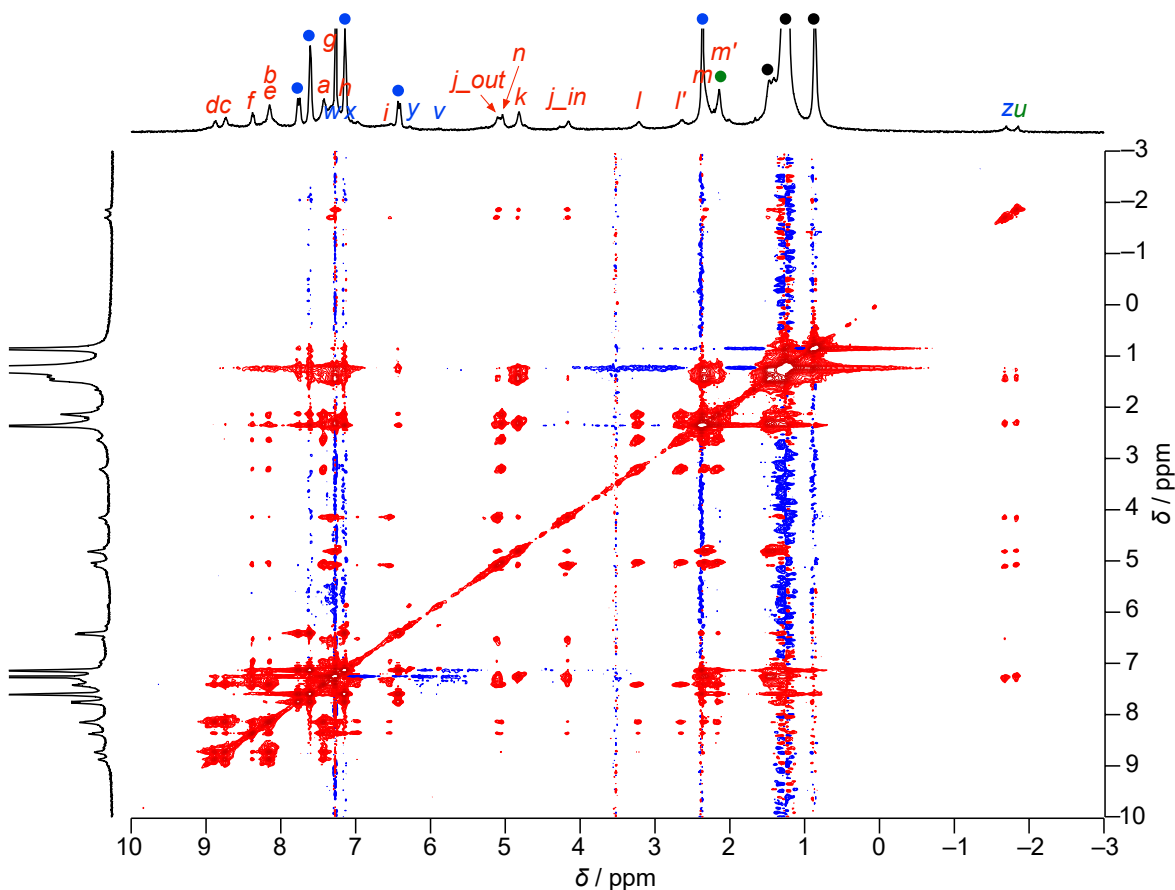

**Figure S17.** NOESY (500 MHz, chloroform- $d_3$ , 223 K) of a mixture of  $[1\text{Ag}](\text{BF}_4)_4$ , **G1a**, and **G2a**. The concentration of  $[1\text{Ag}](\text{BF}_4)_4$ , **G1a**, and **G2a** are 1.5 mM, 15 mM, and 15 mM, respectively. Mixing time = 500 ms.

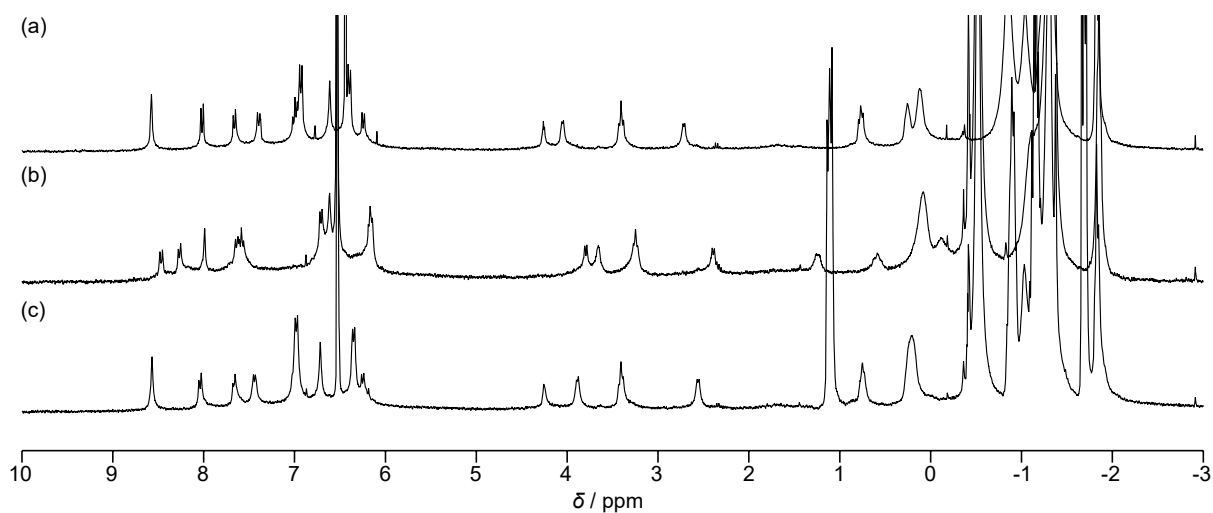

**Figure S18.** <sup>1</sup>H NMR spectra (500 MHz, chloroform-*d*<sub>1</sub>, 223 K) of (a) **1** (1.0 mM), (b) after the addition of four equivalents of AgBF<sub>4</sub> in acetonitrile-*d*<sub>3</sub> (60  $\mu$ L) to the mixture, (c) after the addition of eight equivalents of tetraethylammonium iodide in chloroform-*d*<sub>1</sub> (40  $\mu$ L) to the mixture.

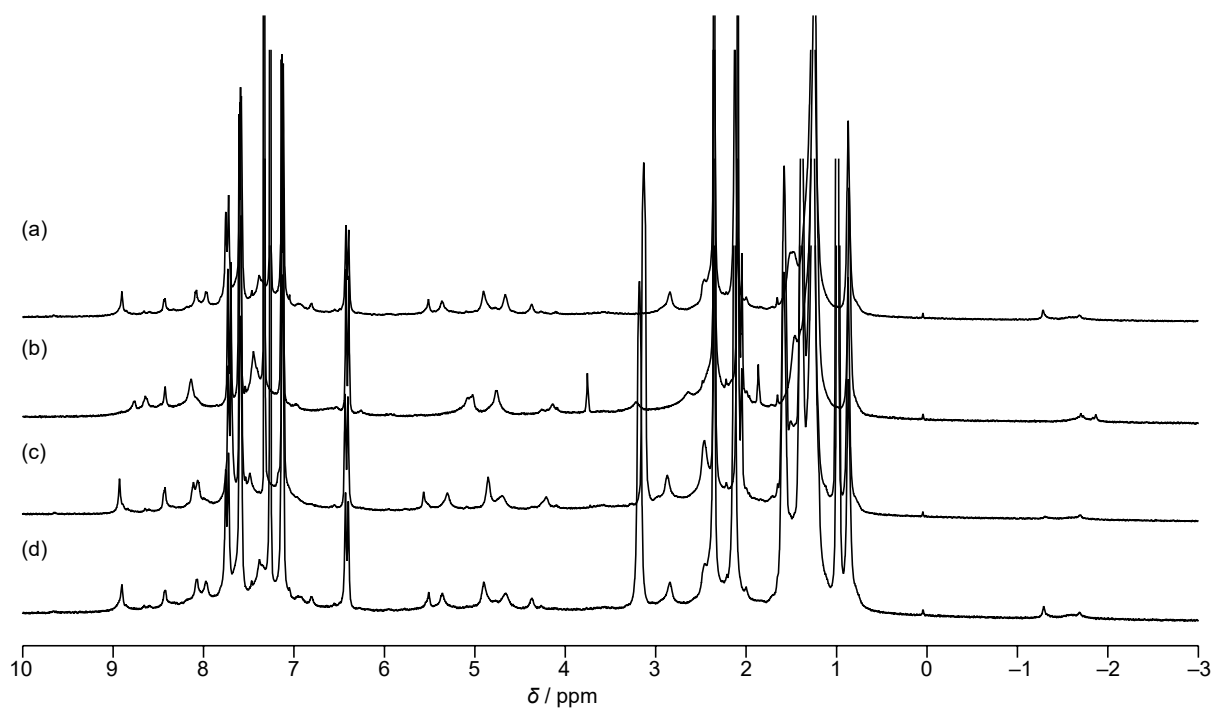

**Figure S19.** <sup>1</sup>H NMR spectra (500 MHz, chloroform-*d*<sub>1</sub>, 223 K) of (a) a mixture of **G1a** (10 mM), **G2a** (10 mM) and **1** (1.0 mM), (b) after the addition of four equivalents of AgBF<sub>4</sub> in acetonitrile-*d*<sub>3</sub> (60  $\mu$ L) to the mixture, (c) after the addition of eight equivalents of tetraethylammonium iodide in chloroform-*d*<sub>1</sub> (40  $\mu$ L) to the mixture, and (d) after the concentration of the solution of (c) followed by the addition of chloroform-*d*<sub>1</sub> to regulate the concentration of **1** to be 1.0 mM.

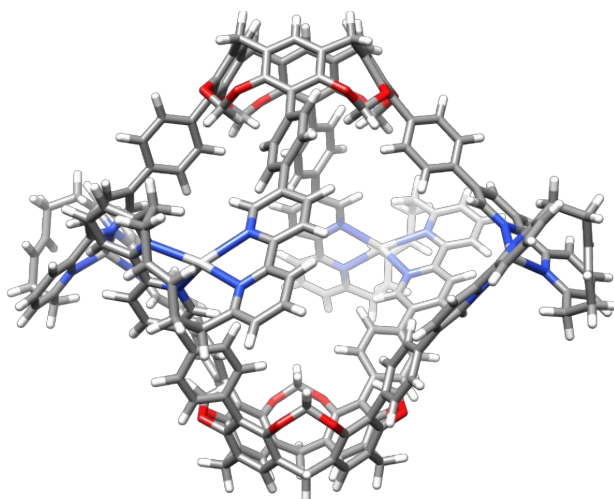

**Figure S20.** Optimized structures of **M1Ag** at B3LYP/6-31G(d)+LanL2DZ. Color scheme: gray (carbon), white (hydrogen), blue (nitrogen), red (oxygen), pale gray (silver).

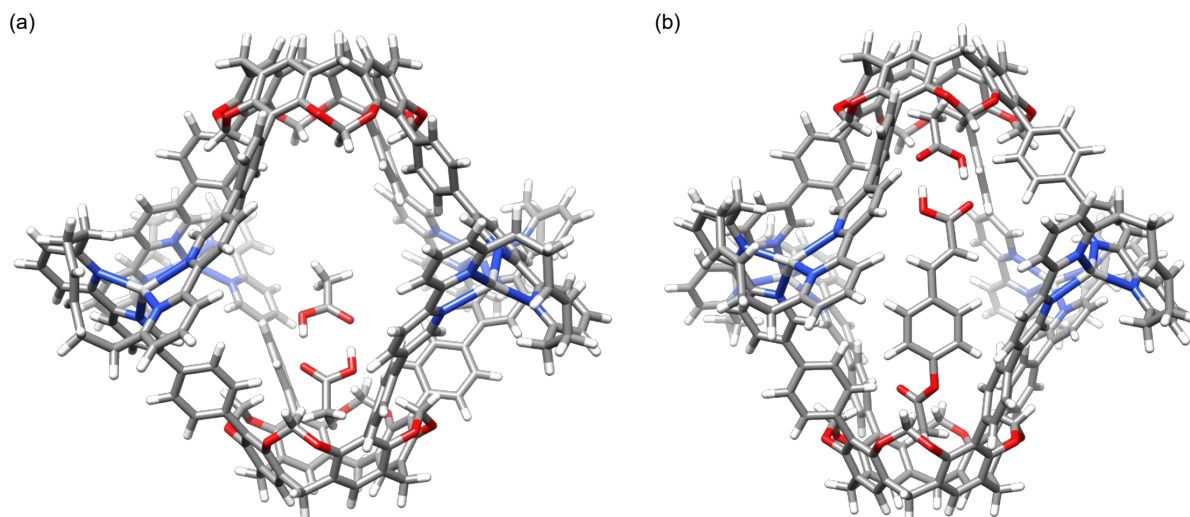

**Figure S21.** Optimized structures of (a) **G1a-G1a-M1Ag** and (b) **G1a-G2a-M1Ag** at B3LYP/6-31G(d)+LanL2DZ. Color scheme: gray (carbon), white (hydrogen), blue (nitrogen), red (oxygen), pale gray (silver).

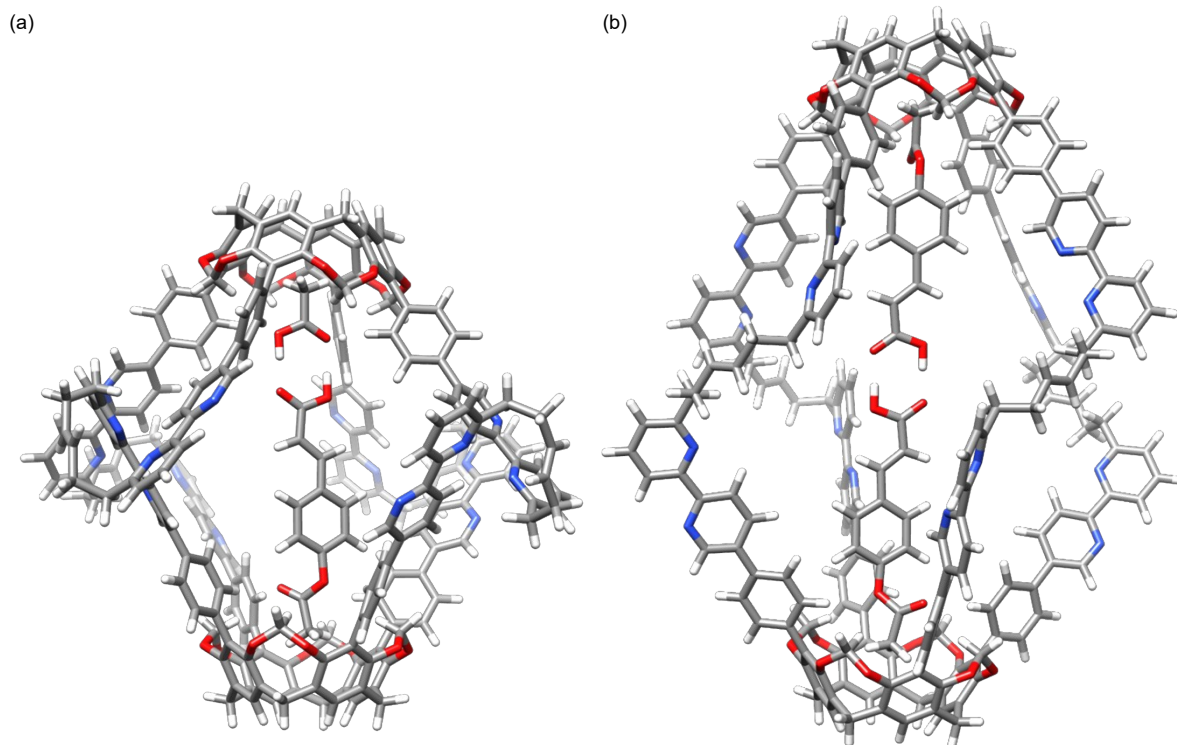

**Figure S22.** Optimized structures of (a) **G1a•G2a•M1** and (b) **G2a•G2a•M1** at B3LYP/6-31G(d). Color scheme: gray (carbon), white (hydrogen), blue (nitrogen), red (oxygen).

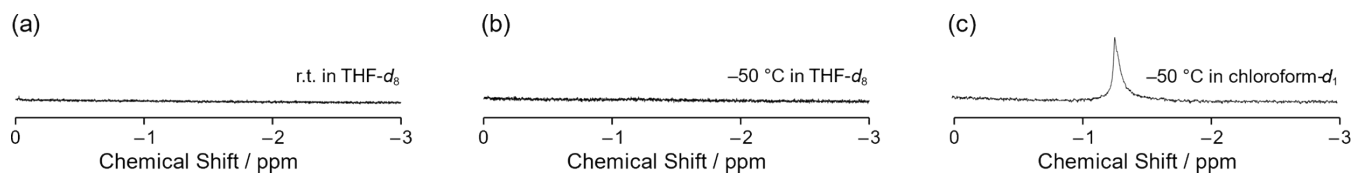

**Figure S23.** Selected region of <sup>1</sup>H NMR spectra (500 MHz) of a mixture **1** and **G2a** in THF-*d*<sub>8</sub> at (a) 298 K and (b) at 223 K and (c) a mixture of **1** and **G2a** in chloroform-*d*<sub>1</sub> at 223 K. The concentrations of **1** and **G2a** were 1.5 mM and 15 mM, respectively.

**Table S1.** PDB file of **M1Ag**

REMARK 1 File created by GaussView 6.1.1

|        |    |   |   |        |        |       |   |
|--------|----|---|---|--------|--------|-------|---|
| HETATM | 1  | C | 0 | 3.156  | -0.998 | 9.059 | C |
| HETATM | 2  | C | 0 | 3.853  | -0.849 | 7.852 | C |
| HETATM | 3  | C | 0 | 4.089  | 0.423  | 7.290 | C |
| HETATM | 4  | C | 0 | 3.519  | 1.539  | 7.936 | C |
| HETATM | 5  | C | 0 | 2.795  | 1.417  | 9.126 | C |
| HETATM | 6  | C | 0 | 2.639  | 0.143  | 9.673 | C |
| HETATM | 7  | C | 0 | 2.937  | -2.370 | 9.664 | C |
| HETATM | 8  | C | 0 | 2.142  | 2.630  | 9.756 | C |
| HETATM | 9  | C | 0 | -1.695 | 3.145  | 7.848 | C |
| HETATM | 10 | C | 0 | -0.561 | 3.755  | 7.272 | C |
| HETATM | 11 | C | 0 | 0.676  | 3.580  | 7.925 | C |
| HETATM | 12 | C | 0 | 0.787  | 2.866  | 9.123 | C |
| HETATM | 13 | C | 0 | -0.372 | 2.319  | 9.674 | C |
| HETATM | 14 | C | 0 | -1.618 | 2.445  | 9.059 | C |
| HETATM | 15 | C | 0 | -0.582 | -4.099 | 7.856 | C |
| HETATM | 16 | C | 0 | 0.673  | -4.302 | 7.245 | C |
| HETATM | 17 | C | 0 | 1.708  | -3.020 | 9.067 | C |
| HETATM | 18 | C | 0 | 0.451  | -2.886 | 9.656 | C |
| HETATM | 19 | C | 0 | -0.702 | -3.413 | 9.074 | C |
| HETATM | 20 | C | 0 | -2.853 | 1.807  | 9.660 | C |
| HETATM | 21 | C | 0 | -2.057 | -3.203 | 9.720 | C |
| HETATM | 22 | C | 0 | -3.466 | -2.099 | 7.943 | C |
| HETATM | 23 | C | 0 | -4.034 | -0.980 | 7.303 | C |
| HETATM | 24 | C | 0 | -3.795 | 0.286  | 7.871 | C |
| HETATM | 25 | C | 0 | -3.086 | 0.431  | 9.071 | C |



|        |    |   |   |        |        |       |   |
|--------|----|---|---|--------|--------|-------|---|
| HETATM | 26 | C | 0 | -2.564 | -0.712 | 9.677 | C |
| HETATM | 27 | C | 0 | -2.727 | -1.983 | 9.124 | C |
| HETATM | 28 | O | 0 | -3.667 | -3.356 | 7.392 | O |
| HETATM | 29 | O | 0 | -1.698 | -4.691 | 7.285 | O |
| HETATM | 30 | O | 0 | 4.417  | -1.957 | 7.241 | O |
| HETATM | 31 | O | 0 | 3.047  | -3.904 | 7.280 | O |
| HETATM | 32 | O | 0 | -4.346 | 1.404  | 7.264 | O |
| HETATM | 33 | O | 0 | -2.929 | 3.324  | 7.242 | O |
| HETATM | 34 | O | 0 | 3.731  | 2.798  | 7.395 | O |
| HETATM | 35 | O | 0 | 1.802  | 4.180  | 7.381 | O |
| HETATM | 36 | C | 0 | 6.934  | 0.938  | 4.076 | C |
| HETATM | 37 | C | 0 | 7.032  | 1.667  | 5.274 | C |
| HETATM | 38 | C | 0 | 6.095  | 1.505  | 6.286 | C |
| HETATM | 39 | C | 0 | 5.020  | 0.611  | 6.144 | C |
| HETATM | 40 | C | 0 | 4.909  | -0.099 | 4.939 | C |
| HETATM | 41 | C | 0 | 5.850  | 0.058  | 3.923 | C |
| HETATM | 42 | C | 0 | 1.124  | -6.974 | 3.876 | C |
| HETATM | 43 | C | 0 | 1.897  | -7.122 | 5.040 | C |
| HETATM | 44 | C | 0 | 1.752  | -6.246 | 6.108 | C |
| HETATM | 45 | C | 0 | 0.834  | -5.183 | 6.057 | C |
| HETATM | 46 | C | 0 | 0.080  | -5.023 | 4.885 | C |
| HETATM | 47 | C | 0 | 0.217  | -5.903 | 3.814 | C |
| HETATM | 48 | C | 0 | -6.782 | -1.460 | 4.000 | C |
| HETATM | 49 | C | 0 | -6.948 | -2.165 | 5.205 | C |
| HETATM | 50 | C | 0 | -6.044 | -2.017 | 6.249 | C |
| HETATM | 51 | C | 0 | -4.939 | -1.156 | 6.135 | C |

|        |    |   |   |        |        |        |   |
|--------|----|---|---|--------|--------|--------|---|
| HETATM | 52 | C | 0 | -4.761 | -0.470 | 4.925  | C |
| HETATM | 53 | C | 0 | -5.666 | -0.617 | 3.876  | C |
| HETATM | 54 | C | 0 | -1.009 | 6.453  | 3.925  | C |
| HETATM | 55 | C | 0 | -0.333 | 6.843  | 5.094  | C |
| HETATM | 56 | C | 0 | -0.172 | 5.956  | 6.153  | C |
| HETATM | 57 | C | 0 | -0.675 | 4.646  | 6.086  | C |
| HETATM | 58 | C | 0 | -1.313 | 4.248  | 4.901  | C |
| HETATM | 59 | C | 0 | -1.484 | 5.135  | 3.842  | C |
| HETATM | 60 | C | 0 | -1.608 | 9.340  | 0.845  | C |
| HETATM | 61 | N | 0 | -0.418 | 9.247  | 1.474  | N |
| HETATM | 62 | C | 0 | -0.248 | 8.328  | 2.428  | C |
| HETATM | 63 | C | 0 | -1.240 | 7.419  | 2.831  | C |
| HETATM | 64 | C | 0 | -2.460 | 7.491  | 2.142  | C |
| HETATM | 65 | C | 0 | -2.645 | 8.448  | 1.151  | C |
| HETATM | 66 | C | 0 | -1.966 | 12.374 | -2.094 | C |
| HETATM | 67 | C | 0 | -0.728 | 11.852 | -1.691 | C |
| HETATM | 68 | N | 0 | -0.647 | 10.895 | -0.751 | N |
| HETATM | 69 | C | 0 | -1.769 | 10.414 | -0.176 | C |
| HETATM | 70 | C | 0 | -3.032 | 10.912 | -0.515 | C |
| HETATM | 71 | C | 0 | -3.127 | 11.905 | -1.490 | C |
| HETATM | 72 | C | 0 | -9.598 | -1.753 | 0.803  | C |
| HETATM | 73 | N | 0 | -9.010 | -0.576 | 1.099  | N |
| HETATM | 74 | C | 0 | -8.135 | -0.507 | 2.105  | C |
| HETATM | 75 | C | 0 | -7.763 | -1.602 | 2.904  | C |
| HETATM | 76 | C | 0 | -8.402 | -2.816 | 2.614  | C |
| HETATM | 77 | C | 0 | -9.319 | -2.893 | 1.573  | C |

|        |     |   |   |         |         |        |   |
|--------|-----|---|---|---------|---------|--------|---|
| HETATM | 78  | C | 0 | -12.339 | -1.742  | -2.439 | C |
| HETATM | 79  | C | 0 | -11.851 | -0.566  | -1.856 | C |
| HETATM | 80  | N | 0 | -10.974 | -0.602  | -0.836 | N |
| HETATM | 81  | C | 0 | -10.550 | -1.786  | -0.347 | C |
| HETATM | 82  | C | 0 | -10.986 | -2.995  | -0.903 | C |
| HETATM | 83  | C | 0 | -11.894 | -2.969  | -1.959 | C |
| HETATM | 84  | C | 0 | 1.414   | -9.743  | 0.637  | C |
| HETATM | 85  | N | 0 | 0.218   | -9.252  | 1.022  | N |
| HETATM | 86  | C | 0 | 0.150   | -8.385  | 2.036  | C |
| HETATM | 87  | C | 0 | 1.265   | -7.926  | 2.755  | C |
| HETATM | 88  | C | 0 | 2.508   | -8.439  | 2.353  | C |
| HETATM | 89  | C | 0 | 2.584   | -9.340  | 1.298  | C |
| HETATM | 90  | C | 0 | 1.389   | -12.428 | -2.654 | C |
| HETATM | 91  | C | 0 | 2.558   | -12.310 | -1.911 | C |
| HETATM | 92  | C | 0 | 2.584   | -11.445 | -0.818 | C |
| HETATM | 93  | C | 0 | 1.436   | -10.709 | -0.502 | C |
| HETATM | 94  | N | 0 | 0.299   | -10.852 | -1.218 | N |
| HETATM | 95  | C | 0 | 0.262   | -11.690 | -2.269 | C |
| HETATM | 96  | C | 0 | 9.997   | 1.266   | 1.121  | C |
| HETATM | 97  | C | 0 | 9.561   | 2.422   | 1.784  | C |
| HETATM | 98  | C | 0 | 8.553   | 2.334   | 2.735  | C |
| HETATM | 99  | C | 0 | 7.967   | 1.094   | 3.030  | C |
| HETATM | 100 | C | 0 | 8.447   | -0.003  | 2.297  | C |
| HETATM | 101 | N | 0 | 9.416   | 0.076   | 1.380  | N |
| HETATM | 102 | C | 0 | 13.127  | 1.264   | -1.743 | C |
| HETATM | 103 | C | 0 | 12.229  | 0.195   | -1.601 | C |

|              |   |        |        |        |   |
|--------------|---|--------|--------|--------|---|
| HETATM 104 N | 0 | 11.247 | 0.228  | -0.686 | N |
| HETATM 105 C | 0 | 11.111 | 1.297  | 0.128  | C |
| HETATM 106 C | 0 | 11.997 | 2.379  | 0.057  | C |
| HETATM 107 C | 0 | 13.013 | 2.360  | -0.897 | C |
| HETATM 108 C | 0 | 3.196  | 0.137  | -8.989 | C |
| HETATM 109 C | 0 | 3.813  | -0.274 | -7.799 | C |
| HETATM 110 C | 0 | 3.622  | -1.572 | -7.282 | C |
| HETATM 111 C | 0 | 2.714  | -2.414 | -7.955 | C |
| HETATM 112 C | 0 | 2.066  | -2.021 | -9.129 | C |
| HETATM 113 C | 0 | 2.333  | -0.749 | -9.633 | C |
| HETATM 114 C | 0 | 3.429  | 1.530  | -9.540 | C |
| HETATM 115 C | 0 | 1.054  | -2.938 | -9.783 | C |
| HETATM 116 C | 0 | -2.820 | -2.328 | -7.994 | C |
| HETATM 117 C | 0 | -1.941 | -3.253 | -7.399 | C |
| HETATM 118 C | 0 | -0.668 | -3.416 | -7.983 | C |
| HETATM 119 C | 0 | -0.312 | -2.740 | -9.159 | C |
| HETATM 120 C | 0 | -1.229 | -1.849 | -9.718 | C |
| HETATM 121 C | 0 | -2.480 | -1.616 | -9.147 | C |
| HETATM 122 C | 0 | 0.656  | 4.198  | -7.585 | C |
| HETATM 123 C | 0 | 1.924  | 3.984  | -7.004 | C |
| HETATM 124 C | 0 | 2.803  | 3.105  | -7.669 | C |
| HETATM 125 C | 0 | 2.476  | 2.512  | -8.892 | C |
| HETATM 126 C | 0 | 1.234  | 2.802  | -9.454 | C |
| HETATM 127 C | 0 | 0.312  | 3.636  | -8.822 | C |
| HETATM 128 C | 0 | -3.424 | -0.569 | -9.700 | C |
| HETATM 129 C | 0 | -1.048 | 3.896  | -9.439 | C |

|            |   |   |        |        |        |   |
|------------|---|---|--------|--------|--------|---|
| HETATM 130 | C | 0 | -2.724 | 3.182  | -7.691 | C |
| HETATM 131 | C | 0 | -3.634 | 2.271  | -7.118 | C |
| HETATM 132 | C | 0 | -3.825 | 1.037  | -7.777 | C |
| HETATM 133 | C | 0 | -3.198 | 0.756  | -8.999 | C |
| HETATM 134 | C | 0 | -2.328 | 1.705  | -9.535 | C |
| HETATM 135 | C | 0 | -2.066 | 2.916  | -8.895 | C |
| HETATM 136 | O | 0 | -2.507 | 4.397  | -7.056 | O |
| HETATM 137 | O | 0 | -0.224 | 5.068  | -6.958 | O |
| HETATM 138 | O | 0 | 4.713  | 0.567  | -7.163 | O |
| HETATM 139 | O | 0 | 4.048  | 2.854  | -7.109 | O |
| HETATM 140 | O | 0 | -4.735 | 0.137  | -7.247 | O |
| HETATM 141 | O | 0 | -4.075 | -2.143 | -7.430 | O |
| HETATM 142 | O | 0 | 2.486  | -3.688 | -7.454 | O |
| HETATM 143 | O | 0 | 0.197  | -4.345 | -7.428 | O |
| HETATM 144 | C | 0 | 6.166  | -3.114 | -4.144 | C |
| HETATM 145 | C | 0 | 6.004  | -3.791 | -5.365 | C |
| HETATM 146 | C | 0 | 5.162  | -3.293 | -6.351 | C |
| HETATM 147 | C | 0 | 4.446  | -2.098 | -6.160 | C |
| HETATM 148 | C | 0 | 4.589  | -1.436 | -4.932 | C |
| HETATM 149 | C | 0 | 5.435  | -1.932 | -3.941 | C |
| HETATM 150 | C | 0 | 3.241  | 6.430  | -3.691 | C |
| HETATM 151 | C | 0 | 4.012  | 6.292  | -4.858 | C |
| HETATM 152 | C | 0 | 3.588  | 5.477  | -5.900 | C |
| HETATM 153 | C | 0 | 2.380  | 4.761  | -5.819 | C |
| HETATM 154 | C | 0 | 1.631  | 4.871  | -4.638 | C |
| HETATM 155 | C | 0 | 2.050  | 5.693  | -3.594 | C |

|              |   |        |         |        |   |
|--------------|---|--------|---------|--------|---|
| HETATM 156 C | 0 | -6.159 | 3.393   | -3.793 | C |
| HETATM 157 C | 0 | -6.004 | 4.228   | -4.912 | C |
| HETATM 158 C | 0 | -5.169 | 3.865   | -5.962 | C |
| HETATM 159 C | 0 | -4.451 | 2.656   | -5.935 | C |
| HETATM 160 C | 0 | -4.583 | 1.840   | -4.802 | C |
| HETATM 161 C | 0 | -5.425 | 2.197   | -3.751 | C |
| HETATM 162 C | 0 | -3.291 | -5.823  | -4.194 | C |
| HETATM 163 C | 0 | -4.007 | -5.707  | -5.399 | C |
| HETATM 164 C | 0 | -3.570 | -4.863  | -6.411 | C |
| HETATM 165 C | 0 | -2.396 | -4.104  | -6.266 | C |
| HETATM 166 C | 0 | -1.689 | -4.209  | -5.060 | C |
| HETATM 167 C | 0 | -2.127 | -5.052  | -4.041 | C |
| HETATM 168 C | 0 | -4.542 | -8.483  | -1.094 | C |
| HETATM 169 N | 0 | -3.232 | -8.302  | -1.359 | N |
| HETATM 170 C | 0 | -2.862 | -7.466  | -2.335 | C |
| HETATM 171 C | 0 | -3.759 | -6.734  | -3.129 | C |
| HETATM 172 C | 0 | -5.122 | -6.947  | -2.867 | C |
| HETATM 173 C | 0 | -5.513 | -7.820  | -1.861 | C |
| HETATM 174 C | 0 | -5.494 | -11.191 | 2.036  | C |
| HETATM 175 C | 0 | -4.202 | -11.069 | 1.507  | C |
| HETATM 176 N | 0 | -3.930 | -10.194 | 0.521  | N |
| HETATM 177 C | 0 | -6.214 | -9.474  | 0.521  | C |
| HETATM 178 H | 0 | -6.991 | -8.824  | 0.140  | H |
| HETATM 179 C | 0 | -4.908 | -9.412  | 0.016  | C |
| HETATM 180 C | 0 | -6.506 | -10.378 | 1.540  | C |
| HETATM 181 C | 0 | -8.887 | 4.362   | -0.653 | C |

|              |   |         |        |        |   |
|--------------|---|---------|--------|--------|---|
| HETATM 182 C | 0 | -8.103  | 5.381  | -1.215 | C |
| HETATM 183 C | 0 | -7.210  | 5.083  | -2.237 | C |
| HETATM 184 C | 0 | -7.083  | 3.766  | -2.701 | C |
| HETATM 185 C | 0 | -7.905  | 2.813  | -2.079 | C |
| HETATM 186 N | 0 | -8.768  | 3.095  | -1.099 | N |
| HETATM 187 C | 0 | -11.619 | 5.006  | 2.533  | C |
| HETATM 188 C | 0 | -11.237 | 3.726  | 2.109  | C |
| HETATM 189 N | 0 | -10.376 | 3.554  | 1.091  | N |
| HETATM 190 C | 0 | -9.862  | 4.625  | 0.447  | C |
| HETATM 191 C | 0 | -10.234 | 5.927  | 0.803  | C |
| HETATM 192 C | 0 | -11.120 | 6.116  | 1.862  | C |
| HETATM 193 C | 0 | 4.378   | 9.187  | -0.636 | C |
| HETATM 194 C | 0 | 5.368   | 8.403  | -1.248 | C |
| HETATM 195 C | 0 | 5.014   | 7.493  | -2.236 | C |
| HETATM 196 C | 0 | 3.671   | 7.350  | -2.618 | C |
| HETATM 197 C | 0 | 2.751   | 8.166  | -1.940 | C |
| HETATM 198 N | 0 | 3.086   | 9.043  | -0.992 | N |
| HETATM 199 C | 0 | 5.186   | 12.054 | 2.394  | C |
| HETATM 200 C | 0 | 6.257   | 11.541 | 1.672  | C |
| HETATM 201 C | 0 | 6.015   | 10.606 | 0.667  | C |
| HETATM 202 C | 0 | 4.699   | 10.201 | 0.414  | C |
| HETATM 203 N | 0 | 3.665   | 10.725 | 1.108  | N |
| HETATM 204 C | 0 | 3.889   | 11.631 | 2.076  | C |
| HETATM 205 C | 0 | 8.992   | -4.537 | -1.277 | C |
| HETATM 206 C | 0 | 8.195   | -5.462 | -1.969 | C |
| HETATM 207 C | 0 | 7.258   | -5.013 | -2.890 | C |

|              |   |        |         |        |   |
|--------------|---|--------|---------|--------|---|
| HETATM 208 C | 0 | 7.103  | -3.638  | -3.128 | C |
| HETATM 209 C | 0 | 7.920  | -2.788  | -2.368 | C |
| HETATM 210 N | 0 | 8.822  | -3.214  | -1.478 | N |
| HETATM 211 C | 0 | 11.988 | -5.675  | 1.502  | C |
| HETATM 212 C | 0 | 11.495 | -6.643  | 0.637  | C |
| HETATM 213 C | 0 | 10.516 | -6.287  | -0.290 | C |
| HETATM 214 C | 0 | 10.050 | -4.968  | -0.316 | C |
| HETATM 215 N | 0 | 10.557 | -4.031  | 0.515  | N |
| HETATM 216 C | 0 | 11.505 | -4.361  | 1.407  | C |
| HETATM 217 C | 0 | -3.086 | -11.966 | 1.976  | C |
| HETATM 218 H | 0 | -2.129 | -11.447 | 1.851  | H |
| HETATM 219 H | 0 | -3.208 | -12.179 | 3.045  | H |
| HETATM 220 C | 0 | -3.038 | -13.313 | 1.201  | C |
| HETATM 221 C | 0 | -1.058 | -11.879 | -2.973 | C |
| HETATM 222 H | 0 | -1.702 | -11.017 | -2.762 | H |
| HETATM 223 H | 0 | -0.901 | -11.917 | -4.058 | H |
| HETATM 224 C | 0 | 12.097 | -3.279  | 2.275  | C |
| HETATM 225 H | 0 | 11.416 | -2.421  | 2.318  | H |
| HETATM 226 H | 0 | 12.210 | -3.660  | 3.297  | H |
| HETATM 227 C | 0 | 13.495 | -2.827  | 1.763  | C |
| HETATM 228 C | 0 | 1.802  | -3.727  | 7.864  | C |
| HETATM 229 C | 0 | 12.381 | -1.042  | -2.453 | C |
| HETATM 230 H | 0 | 11.470 | -1.647  | -2.386 | H |
| HETATM 231 H | 0 | 12.493 | -0.733  | -3.500 | H |
| HETATM 232 C | 0 | 2.686  | 12.234  | 2.757  | C |
| HETATM 233 H | 0 | 1.842  | 11.541  | 2.665  | H |



|               |   |         |        |        |    |
|---------------|---|---------|--------|--------|----|
| HETATM 234 H  | 0 | 2.889   | 12.367 | 3.826  | H  |
| HETATM 235 C  | 0 | 0.561   | 12.392 | -2.254 | C  |
| HETATM 236 C  | 0 | 1.002   | 13.717 | -1.571 | C  |
| HETATM 237 H  | 0 | 1.349   | 11.641 | -2.125 | H  |
| HETATM 238 H  | 0 | 0.449   | 12.573 | -3.329 | H  |
| HETATM 239 C  | 0 | -11.847 | 2.497  | 2.734  | C  |
| HETATM 240 H  | 0 | -11.215 | 1.630  | 2.508  | H  |
| HETATM 241 H  | 0 | -11.878 | 2.608  | 3.824  | H  |
| HETATM 242 C  | 0 | -13.288 | 2.229  | 2.212  | C  |
| HETATM 243 H  | 0 | -13.617 | 1.260  | 2.604  | H  |
| HETATM 244 H  | 0 | -13.958 | 2.989  | 2.636  | H  |
| HETATM 245 C  | 0 | -13.396 | 2.256  | 0.711  | C  |
| HETATM 246 H  | 0 | -13.356 | 3.241  | 0.243  | H  |
| HETATM 247 C  | 0 | -12.346 | 0.785  | -2.307 | C  |
| HETATM 248 H  | 0 | -11.567 | 1.534  | -2.125 | H  |
| HETATM 249 H  | 0 | -12.542 | 0.766  | -3.385 | H  |
| HETATM 250 Ag | 0 | 1.444   | 10.301 | 0.303  | Ag |
| HETATM 251 Ag | 0 | 10.064  | -1.756 | -0.021 | Ag |
| HETATM 252 Ag | 0 | -1.700  | -9.863 | -0.308 | Ag |
| HETATM 253 Ag | 0 | -10.014 | 1.395  | 0.087  | Ag |
| HETATM 254 H  | 0 | 2.093   | 0.035  | 10.608 | H  |
| HETATM 255 H  | 0 | 2.812   | -2.273 | 10.747 | H  |
| HETATM 256 H  | 0 | 3.814   | -2.997 | 9.479  | H  |
| HETATM 257 H  | 0 | 2.023   | 2.467  | 10.832 | H  |
| HETATM 258 H  | 0 | 2.777   | 3.509  | 9.612  | H  |
| HETATM 259 H  | 0 | -0.302  | 1.773  | 10.612 | H  |

|              |   |        |        |        |   |
|--------------|---|--------|--------|--------|---|
| HETATM 260 H | 0 | 0.366  | -2.350 | 10.598 | H |
| HETATM 261 H | 0 | -2.728 | 1.723  | 10.744 | H |
| HETATM 262 H | 0 | -3.724 | 2.441  | 9.468  | H |
| HETATM 263 H | 0 | -2.004 | -0.608 | 10.603 | H |
| HETATM 264 H | 0 | -2.684 | -4.085 | 9.560  | H |
| HETATM 265 H | 0 | -1.930 | -3.065 | 10.798 | H |
| HETATM 266 H | 0 | 7.876  | 2.332  | 5.434  | H |
| HETATM 267 H | 0 | 6.203  | 2.061  | 7.210  | H |
| HETATM 268 H | 0 | 4.072  | -0.770 | 4.786  | H |
| HETATM 269 H | 0 | 5.729  | -0.491 | 2.993  | H |
| HETATM 270 H | 0 | 2.587  | -7.957 | 5.127  | H |
| HETATM 271 H | 0 | 2.345  | -6.391 | 7.004  | H |
| HETATM 272 H | 0 | -0.608 | -4.189 | 4.798  | H |
| HETATM 273 H | 0 | -0.366 | -5.742 | 2.911  | H |
| HETATM 274 H | 0 | -7.816 | -2.804 | 5.343  | H |
| HETATM 275 H | 0 | -6.199 | -2.558 | 7.176  | H |
| HETATM 276 H | 0 | -3.897 | 0.171  | 4.793  | H |
| HETATM 277 H | 0 | -5.488 | -0.091 | 2.941  | H |
| HETATM 278 H | 0 | 0.024  | 7.864  | 5.195  | H |
| HETATM 279 H | 0 | 0.328  | 6.286  | 7.056  | H |
| HETATM 280 H | 0 | -1.670 | 3.229  | 4.800  | H |
| HETATM 281 H | 0 | -1.975 | 4.796  | 2.933  | H |
| HETATM 282 H | 0 | 0.735  | 8.302  | 2.891  | H |
| HETATM 283 H | 0 | -3.268 | 6.814  | 2.403  | H |
| HETATM 284 H | 0 | -3.587 | 8.496  | 0.615  | H |
| HETATM 285 H | 0 | -2.003 | 13.145 | -2.857 | H |

|              |   |         |         |         |   |
|--------------|---|---------|---------|---------|---|
| HETATM 286 H | 0 | -3.923  | 10.558  | -0.010  | H |
| HETATM 287 H | 0 | -4.095  | 12.312  | -1.766  | H |
| HETATM 288 H | 0 | -7.722  | 0.478   | 2.305   | H |
| HETATM 289 H | 0 | -8.173  | -3.703  | 3.197   | H |
| HETATM 290 H | 0 | -9.822  | -3.832  | 1.377   | H |
| HETATM 291 H | 0 | -13.052 | -1.685  | -3.256  | H |
| HETATM 292 H | 0 | -10.616 | -3.945  | -0.535  | H |
| HETATM 293 H | 0 | -12.246 | -3.896  | -2.402  | H |
| HETATM 294 H | 0 | -0.848  | -8.053  | 2.309   | H |
| HETATM 295 H | 0 | 3.414   | -8.114  | 2.854   | H |
| HETATM 296 H | 0 | 3.554   | -9.704  | 0.984   | H |
| HETATM 297 H | 0 | 1.332   | -13.094 | -3.509  | H |
| HETATM 298 H | 0 | 3.439   | -12.889 | -2.171  | H |
| HETATM 299 H | 0 | 3.482   | -11.368 | -0.219  | H |
| HETATM 300 H | 0 | 9.988   | 3.390   | 1.547   | H |
| HETATM 301 H | 0 | 8.206   | 3.230   | 3.240   | H |
| HETATM 302 H | 0 | 8.050   | -0.997  | 2.482   | H |
| HETATM 303 H | 0 | 13.908  | 1.216   | -2.495  | H |
| HETATM 304 H | 0 | 11.919  | 3.212   | 0.745   | H |
| HETATM 305 H | 0 | 13.711  | 3.188   | -0.969  | H |
| HETATM 306 H | 0 | 1.849   | -0.435  | -10.555 | H |
| HETATM 307 H | 0 | 3.270   | 1.524   | -10.623 | H |
| HETATM 308 H | 0 | 4.461   | 1.835   | -9.349  | H |
| HETATM 309 H | 0 | 1.000   | -2.720  | -10.855 | H |
| HETATM 310 H | 0 | 1.367   | -3.979  | -9.663  | H |
| HETATM 311 H | 0 | -0.956  | -1.315  | -10.625 | H |

|              |   |        |         |         |   |
|--------------|---|--------|---------|---------|---|
| HETATM 312 H | 0 | 0.973  | 2.361   | -10.413 | H |
| HETATM 313 H | 0 | -3.251 | -0.447  | -10.774 | H |
| HETATM 314 H | 0 | -4.459 | -0.891  | -9.556  | H |
| HETATM 315 H | 0 | -1.834 | 1.492   | -10.480 | H |
| HETATM 316 H | 0 | -1.364 | 4.919   | -9.217  | H |
| HETATM 317 H | 0 | -0.981 | 3.789   | -10.526 | H |
| HETATM 318 H | 0 | 6.578  | -4.692  | -5.564  | H |
| HETATM 319 H | 0 | 5.070  | -3.821  | -7.294  | H |
| HETATM 320 H | 0 | 4.024  | -0.531  | -4.740  | H |
| HETATM 321 H | 0 | 5.512  | -1.407  | -2.993  | H |
| HETATM 322 H | 0 | 4.926  | 6.868   | -4.973  | H |
| HETATM 323 H | 0 | 4.185  | 5.408   | -6.803  | H |
| HETATM 324 H | 0 | 0.716  | 4.300   | -4.527  | H |
| HETATM 325 H | 0 | 1.455  | 5.748   | -2.686  | H |
| HETATM 326 H | 0 | -6.578 | 5.148   | -4.983  | H |
| HETATM 327 H | 0 | -5.084 | 4.513   | -6.827  | H |
| HETATM 328 H | 0 | -4.010 | 0.922   | -4.732  | H |
| HETATM 329 H | 0 | -5.495 | 1.551   | -2.879  | H |
| HETATM 330 H | 0 | -4.894 | -6.313  | -5.562  | H |
| HETATM 331 H | 0 | -4.130 | -4.799  | -7.337  | H |
| HETATM 332 H | 0 | -0.798 | -3.609  | -4.906  | H |
| HETATM 333 H | 0 | -1.573 | -5.091  | -3.107  | H |
| HETATM 334 H | 0 | -1.792 | -7.392  | -2.510  | H |
| HETATM 335 H | 0 | -5.874 | -6.421  | -3.446  | H |
| HETATM 336 H | 0 | -6.569 | -7.990  | -1.687  | H |
| HETATM 337 H | 0 | -5.688 | -11.910 | 2.825   | H |

|              |   |         |         |        |   |
|--------------|---|---------|---------|--------|---|
| HETATM 338 H | 0 | -7.513  | -10.442 | 1.942  | H |
| HETATM 339 H | 0 | -8.168  | 6.398   | -0.849 | H |
| HETATM 340 H | 0 | -6.592  | 5.868   | -2.663 | H |
| HETATM 341 H | 0 | -7.882  | 1.777   | -2.406 | H |
| HETATM 342 H | 0 | -12.311 | 5.116   | 3.362  | H |
| HETATM 343 H | 0 | -9.862  | 6.785   | 0.257  | H |
| HETATM 344 H | 0 | -11.419 | 7.119   | 2.153  | H |
| HETATM 345 H | 0 | 6.406   | 8.483   | -0.948 | H |
| HETATM 346 H | 0 | 5.777   | 6.877   | -2.703 | H |
| HETATM 347 H | 0 | 1.696   | 8.128   | -2.198 | H |
| HETATM 348 H | 0 | 5.338   | 12.784  | 3.183  | H |
| HETATM 349 H | 0 | 7.271   | 11.866  | 1.882  | H |
| HETATM 350 H | 0 | 6.842   | 10.221  | 0.083  | H |
| HETATM 351 H | 0 | 8.288   | -6.524  | -1.779 | H |
| HETATM 352 H | 0 | 6.634   | -5.727  | -3.418 | H |
| HETATM 353 H | 0 | 7.866   | -1.711  | -2.506 | H |
| HETATM 354 H | 0 | 12.750  | -5.917  | 2.236  | H |
| HETATM 355 H | 0 | 11.869  | -7.661  | 0.674  | H |
| HETATM 356 H | 0 | 10.146  | -7.026  | -0.991 | H |
| HETATM 357 C | 0 | -2.623  | -3.876  | 6.591  | C |
| HETATM 358 C | 0 | -1.336  | 4.522   | -6.274 | C |
| HETATM 359 H | 0 | -2.104  | -3.052  | 6.083  | H |
| HETATM 360 H | 0 | -3.106  | -4.542  | 5.874  | H |
| HETATM 361 H | 0 | -1.077  | 3.548   | -5.838 | H |
| HETATM 362 H | 0 | -1.578  | 5.251   | -5.499 | H |
| HETATM 363 C | 0 | 3.570   | -2.832  | 6.520  | C |

|              |   |        |        |        |   |
|--------------|---|--------|--------|--------|---|
| HETATM 364 C | 0 | 4.205  | 1.643  | -6.396 | C |
| HETATM 365 H | 0 | 2.747  | -2.272 | 6.055  | H |
| HETATM 366 H | 0 | 4.211  | -3.293 | 5.767  | H |
| HETATM 367 H | 0 | 3.252  | 1.362  | -5.928 | H |
| HETATM 368 H | 0 | 4.972  | 1.842  | -5.646 | H |
| HETATM 369 C | 0 | 2.688  | 3.371  | 6.629  | C |
| HETATM 370 C | 0 | 1.311  | -3.879 | -6.690 | C |
| HETATM 371 H | 0 | 2.132  | 2.589  | 6.098  | H |
| HETATM 372 H | 0 | 3.179  | 4.051  | 5.932  | H |
| HETATM 373 H | 0 | 1.059  | -2.950 | -6.161 | H |
| HETATM 374 H | 0 | 1.543  | -4.683 | -5.990 | H |
| HETATM 375 C | 0 | -3.478 | 2.239  | 6.524  | C |
| HETATM 376 C | 0 | -4.245 | -1.018 | -6.592 | C |
| HETATM 377 H | 0 | -2.671 | 1.636  | 6.085  | H |
| HETATM 378 H | 0 | -4.102 | 2.690  | 5.750  | H |
| HETATM 379 H | 0 | -3.300 | -0.795 | -6.078 | H |
| HETATM 380 H | 0 | -5.026 | -1.295 | -5.883 | H |
| HETATM 381 H | 0 | 13.954 | -2.207 | 2.541  | H |
| HETATM 382 H | 0 | 14.128 | -3.717 | 1.658  | H |
| HETATM 383 C | 0 | 13.465 | -2.060 | 0.462  | C |
| HETATM 384 H | 0 | 13.374 | -0.979 | 0.549  | H |
| HETATM 385 C | 0 | 13.562 | -2.626 | -0.748 | C |
| HETATM 386 H | 0 | 13.661 | -3.711 | -0.794 | H |
| HETATM 387 C | 0 | 13.616 | -1.907 | -2.081 | C |
| HETATM 388 H | 0 | 14.510 | -1.270 | -2.118 | H |
| HETATM 389 H | 0 | 13.745 | -2.648 | -2.877 | H |

|        |     |   |   |         |         |        |   |
|--------|-----|---|---|---------|---------|--------|---|
| HETATM | 390 | H | 0 | -3.929  | -13.898 | 1.463  | H |
| HETATM | 391 | C | 0 | -2.967  | -13.151 | -0.294 | C |
| HETATM | 392 | H | 0 | -3.892  | -12.866 | -0.797 | H |
| HETATM | 393 | H | 0 | -2.170  | -13.877 | 1.563  | H |
| HETATM | 394 | C | 0 | -1.863  | -13.332 | -1.027 | C |
| HETATM | 395 | H | 0 | -0.938  | -13.612 | -0.521 | H |
| HETATM | 396 | C | 0 | -1.780  | -13.181 | -2.522 | C |
| HETATM | 397 | H | 0 | -1.243  | -14.041 | -2.943 | H |
| HETATM | 398 | H | 0 | -2.783  | -13.185 | -2.965 | H |
| HETATM | 399 | H | 0 | 1.979   | 13.997  | -1.979 | H |
| HETATM | 400 | H | 0 | 0.298   | 14.509  | -1.861 | H |
| HETATM | 401 | C | 0 | 1.067   | 13.647  | -0.067 | C |
| HETATM | 402 | H | 0 | 0.112   | 13.649  | 0.461  | H |
| HETATM | 403 | C | 0 | 2.200   | 13.613  | 0.645  | C |
| HETATM | 404 | H | 0 | 3.152   | 13.608  | 0.111  | H |
| HETATM | 405 | C | 0 | 2.284   | 13.608  | 2.148  | C |
| HETATM | 406 | H | 0 | 1.325   | 13.905  | 2.587  | H |
| HETATM | 407 | H | 0 | 3.023   | 14.356  | 2.463  | H |
| HETATM | 408 | C | 0 | -13.533 | 1.179   | -0.069 | C |
| HETATM | 409 | H | 0 | -13.568 | 0.193   | 0.395  | H |
| HETATM | 410 | C | 0 | -13.646 | 1.217   | -1.570 | C |
| HETATM | 411 | H | 0 | -14.464 | 0.558   | -1.892 | H |
| HETATM | 412 | H | 0 | -13.901 | 2.228   | -1.906 | H |

END

CONNECT 1 2 6 7

CONNECT 2 1 3 30

CONNECT 3 2 4 39  
CONNECT 4 3 5 34  
CONNECT 5 4 6 8  
CONNECT 6 1 5 254  
CONNECT 7 1 17 255 256  
CONNECT 8 5 12 257 258  
CONNECT 9 10 14 33  
CONNECT 10 9 11 57  
CONNECT 11 10 12 35  
CONNECT 12 8 11 13  
CONNECT 13 12 14 259  
CONNECT 14 9 13 20  
CONNECT 15 16 19 29  
CONNECT 16 15 45 228  
CONNECT 17 7 18 228  
CONNECT 18 17 19 260  
CONNECT 19 15 18 21  
CONNECT 20 14 25 261 262  
CONNECT 21 19 27 264 265  
CONNECT 22 23 27 28  
CONNECT 23 22 24 51  
CONNECT 24 23 25 32  
CONNECT 25 24 20 26  
CONNECT 26 25 27 263  
CONNECT 27 21 22 26  
CONNECT 28 22 357



CONNECT 29 15 357  
CONNECT 30 2 363  
CONNECT 31 228 363  
CONNECT 32 24 375  
CONNECT 33 9 375  
CONNECT 34 4 369  
CONNECT 35 11 369  
CONNECT 36 37 41 99  
CONNECT 37 36 38 266  
CONNECT 38 37 39 267  
CONNECT 39 3 38 40  
CONNECT 40 39 41 268  
CONNECT 41 40 36 269  
CONNECT 42 43 47 87  
CONNECT 43 42 44 270  
CONNECT 44 43 45 271  
CONNECT 45 44 16 46  
CONNECT 46 45 47 272  
CONNECT 47 46 42 273  
CONNECT 48 49 53 75  
CONNECT 49 48 50 274  
CONNECT 50 49 51 275  
CONNECT 51 50 23 52  
CONNECT 52 51 53 276  
CONNECT 53 48 52 277  
CONNECT 54 55 59 63

CONNECT 55 54 56 278  
CONNECT 56 55 57 279  
CONNECT 57 10 56 58  
CONNECT 58 57 59 280  
CONNECT 59 54 58 281  
CONNECT 60 61 65 69  
CONNECT 61 60 62  
CONNECT 62 61 63 282  
CONNECT 63 54 62 64  
CONNECT 64 63 65 283  
CONNECT 65 60 64 284  
CONNECT 66 67 71 285  
CONNECT 67 66 68 235  
CONNECT 68 67 69  
CONNECT 69 60 68 70  
CONNECT 70 69 71 286  
CONNECT 71 66 70 287  
CONNECT 72 73 77 81  
CONNECT 73 72 74  
CONNECT 74 73 75 288  
CONNECT 75 48 74 76  
CONNECT 76 75 77 289  
CONNECT 77 72 76 290  
CONNECT 78 79 83 291  
CONNECT 79 78 80 247  
CONNECT 80 79 81

CONNECT 81 72 80 82  
CONNECT 82 81 83 292  
CONNECT 83 78 82 293  
CONNECT 84 85 89 93  
CONNECT 85 84 86  
CONNECT 86 85 87 294  
CONNECT 87 86 42 88  
CONNECT 88 87 89 295  
CONNECT 89 84 88 296  
CONNECT 90 91 95 297  
CONNECT 91 90 92 298  
CONNECT 92 91 93 299  
CONNECT 93 92 84 94  
CONNECT 94 93 95  
CONNECT 95 94 90 221  
CONNECT 96 97 101 105  
CONNECT 97 96 98 300  
CONNECT 98 97 99 301  
CONNECT 99 36 98 100  
CONNECT 100 99 101 302  
CONNECT 101 100 96  
CONNECT 102 103 107 303  
CONNECT 103 102 104 229  
CONNECT 104 103 105  
CONNECT 105 104 96 106  
CONNECT 106 105 107 304

CONNECT 107 106 102 305

CONNECT 108 109 113 114

CONNECT 109 108 110 138

CONNECT 110 109 111 147

CONNECT 111 110 112 142

CONNECT 112 111 113 115

CONNECT 113 108 112 306

CONNECT 114 108 125 307 308

CONNECT 115 112 119 309 310

CONNECT 116 117 121 141

CONNECT 117 116 118 165

CONNECT 118 117 119 143

CONNECT 119 118 115 120

CONNECT 120 119 121 311

CONNECT 121 116 120 128

CONNECT 122 123 127 137

CONNECT 123 122 124 153

CONNECT 124 123 125 139

CONNECT 125 114 124 126

CONNECT 126 125 127 312

CONNECT 127 126 122 129

CONNECT 128 121 133 313 314

CONNECT 129 127 135 316 317

CONNECT 130 131 135 136

CONNECT 131 130 132 159

CONNECT 132 131 133 140

CONNECT 133 128 132 134  
CONNECT 134 133 135 315  
CONNECT 135 129 134 130  
CONNECT 136 130 358  
CONNECT 137 122 358  
CONNECT 138 109 364  
CONNECT 139 124 364  
CONNECT 140 132 376  
CONNECT 141 116 376  
CONNECT 142 111 370  
CONNECT 143 118 370  
CONNECT 144 145 149 208  
CONNECT 145 144 146 318  
CONNECT 146 145 147 319  
CONNECT 147 110 146 148  
CONNECT 148 147 149 320  
CONNECT 149 144 148 321  
CONNECT 150 151 155 196  
CONNECT 151 150 152 322  
CONNECT 152 151 153 323  
CONNECT 153 123 152 154  
CONNECT 154 153 155 324  
CONNECT 155 150 154 325  
CONNECT 156 157 161 184  
CONNECT 157 156 158 326  
CONNECT 158 157 159 327

CONNECT 159 131 158 160  
CONNECT 160 159 161 328  
CONNECT 161 156 160 329  
CONNECT 162 163 167 171  
CONNECT 163 162 164 330  
CONNECT 164 163 165 331  
CONNECT 165 117 164 166  
CONNECT 166 165 167 332  
CONNECT 167 162 166 333  
CONNECT 168 169 173 179  
CONNECT 169 168 170  
CONNECT 170 169 171 334  
CONNECT 171 162 170 172  
CONNECT 172 171 173 335  
CONNECT 173 172 168 336  
CONNECT 174 175 180 337  
CONNECT 175 174 176 217  
CONNECT 176 175 179  
CONNECT 177 178 179 180  
CONNECT 178 177  
CONNECT 179 177 168 176  
CONNECT 180 174 177 338  
CONNECT 181 182 186 190  
CONNECT 182 181 183 339  
CONNECT 183 182 184 340  
CONNECT 184 156 183 185

CONNECT 185 184 186 341  
CONNECT 186 185 181  
CONNECT 187 188 192 342  
CONNECT 188 187 189 239  
CONNECT 189 188 190  
CONNECT 190 181 189 191  
CONNECT 191 190 192 343  
CONNECT 192 187 191 344  
CONNECT 193 194 198 202  
CONNECT 194 193 195 345  
CONNECT 195 194 196 346  
CONNECT 196 150 195 197  
CONNECT 197 196 198 347  
CONNECT 198 197 193  
CONNECT 199 200 204 348  
CONNECT 200 199 201 349  
CONNECT 201 200 202 350  
CONNECT 202 193 201 203  
CONNECT 203 202 204  
CONNECT 204 199 203 232  
CONNECT 205 206 210 214  
CONNECT 206 205 207 351  
CONNECT 207 206 208 352  
CONNECT 208 144 207 209  
CONNECT 209 208 210 353  
CONNECT 210 209 205

CONNECT 211 212 216 354

CONNECT 212 211 213 355

CONNECT 213 212 214 356

CONNECT 214 213 205 215

CONNECT 215 214 216

CONNECT 216 211 215 224

CONNECT 217 175 218 219 220

CONNECT 218 217

CONNECT 219 217

CONNECT 220 217 390 391 393

CONNECT 221 95 222 223 396

CONNECT 222 221

CONNECT 223 221

CONNECT 224 216 225 226 227

CONNECT 225 224

CONNECT 226 224

CONNECT 227 224 381 382 383

CONNECT 228 16 17 31

CONNECT 229 103 230 231 387

CONNECT 230 229

CONNECT 231 229

CONNECT 232 204 233 234 405

CONNECT 233 232

CONNECT 234 232

CONNECT 235 67 236 237 238

CONNECT 236 235 399 400 401



CONNECT 237 235

CONNECT 238 235

CONNECT 239 188 240 241 242

CONNECT 240 239

CONNECT 241 239

CONNECT 242 239 243 244 245

CONNECT 243 242

CONNECT 244 242

CONNECT 245 242 246 408

CONNECT 246 245

CONNECT 247 79 248 249 410

CONNECT 248 247

CONNECT 249 247

CONNECT 254 6

CONNECT 255 7

CONNECT 256 7

CONNECT 257 8

CONNECT 258 8

CONNECT 259 13

CONNECT 260 18

CONNECT 261 20

CONNECT 262 20

CONNECT 263 26

CONNECT 264 21

CONNECT 265 21

CONNECT 266 37

CONNECT 267 38  
CONNECT 268 40  
CONNECT 269 41  
CONNECT 270 43  
CONNECT 271 44  
CONNECT 272 46  
CONNECT 273 47  
CONNECT 274 49  
CONNECT 275 50  
CONNECT 276 52  
CONNECT 277 53  
CONNECT 278 55  
CONNECT 279 56  
CONNECT 280 58  
CONNECT 281 59  
CONNECT 282 62  
CONNECT 283 64  
CONNECT 284 65  
CONNECT 285 66  
CONNECT 286 70  
CONNECT 287 71  
CONNECT 288 74  
CONNECT 289 76  
CONNECT 290 77  
CONNECT 291 78  
CONNECT 292 82

CONNECT 293 83  
CONNECT 294 86  
CONNECT 295 88  
CONNECT 296 89  
CONNECT 297 90  
CONNECT 298 91  
CONNECT 299 92  
CONNECT 300 97  
CONNECT 301 98  
CONNECT 302 100  
CONNECT 303 102  
CONNECT 304 106  
CONNECT 305 107  
CONNECT 306 113  
CONNECT 307 114  
CONNECT 308 114  
CONNECT 309 115  
CONNECT 310 115  
CONNECT 311 120  
CONNECT 312 126  
CONNECT 313 128  
CONNECT 314 128  
CONNECT 315 134  
CONNECT 316 129  
CONNECT 317 129  
CONNECT 318 145

CONNECT 319 146  
CONNECT 320 148  
CONNECT 321 149  
CONNECT 322 151  
CONNECT 323 152  
CONNECT 324 154  
CONNECT 325 155  
CONNECT 326 157  
CONNECT 327 158  
CONNECT 328 160  
CONNECT 329 161  
CONNECT 330 163  
CONNECT 331 164  
CONNECT 332 166  
CONNECT 333 167  
CONNECT 334 170  
CONNECT 335 172  
CONNECT 336 173  
CONNECT 337 174  
CONNECT 338 180  
CONNECT 339 182  
CONNECT 340 183  
CONNECT 341 185  
CONNECT 342 187  
CONNECT 343 191  
CONNECT 344 192

CONNECT 345 194  
CONNECT 346 195  
CONNECT 347 197  
CONNECT 348 199  
CONNECT 349 200  
CONNECT 350 201  
CONNECT 351 206  
CONNECT 352 207  
CONNECT 353 209  
CONNECT 354 211  
CONNECT 355 212  
CONNECT 356 213  
CONNECT 357 28 29 359 360  
CONNECT 358 136 137 361 362  
CONNECT 359 357  
CONNECT 360 357  
CONNECT 361 358  
CONNECT 362 358  
CONNECT 363 30 31 365 366  
CONNECT 364 138 139 367 368  
CONNECT 365 363  
CONNECT 366 363  
CONNECT 367 364  
CONNECT 368 364  
CONNECT 369 34 35 371 372  
CONNECT 370 143 142 373 374

CONNECT 371 369  
CONNECT 372 369  
CONNECT 373 370  
CONNECT 374 370  
CONNECT 375 32 33 377 378  
CONNECT 376 140 141 379 380  
CONNECT 377 375  
CONNECT 378 375  
CONNECT 379 376  
CONNECT 380 376  
CONNECT 381 227  
CONNECT 382 227  
CONNECT 383 227 384 385  
CONNECT 384 383  
CONNECT 385 383 386 387  
CONNECT 386 385  
CONNECT 387 229 385 388 389  
CONNECT 388 387  
CONNECT 389 387  
CONNECT 390 220  
CONNECT 391 220 392 394  
CONNECT 392 391  
CONNECT 393 220  
CONNECT 394 391 395 396  
CONNECT 395 394  
CONNECT 396 221 394 397 398

CONECT 397 396  
 CONECT 398 396  
 CONECT 399 236  
 CONECT 400 236  
 CONECT 401 236 402 403  
 CONECT 402 401  
 CONECT 403 401 404 405  
 CONECT 404 403  
 CONECT 405 232 403 406 407  
 CONECT 406 405  
 CONECT 407 405  
 CONECT 408 245 409 410  
 CONECT 409 408  
 CONECT 410 247 408 411 412  
 CONECT 411 410  
 CONECT 412 410

**Table S2.** PDB file of **G1a•G1a•M1Ag**

REMARK 1 File created by GaussView 6.1.1

|        |   |   |   |        |        |       |   |
|--------|---|---|---|--------|--------|-------|---|
| HETATM | 1 | C | 0 | -2.983 | 1.590  | 9.107 | C |
| HETATM | 2 | C | 0 | -3.699 | 1.613  | 7.901 | C |
| HETATM | 3 | C | 0 | -4.211 | 0.429  | 7.328 | C |
| HETATM | 4 | C | 0 | -3.884 | -0.795 | 7.949 | C |
| HETATM | 5 | C | 0 | -3.152 | -0.848 | 9.140 | C |
| HETATM | 6 | C | 0 | -2.733 | 0.356  | 9.707 | C |
| HETATM | 7 | C | 0 | -2.462 | 2.873  | 9.727 | C |
| HETATM | 8 | C | 0 | -2.776 | -2.182 | 9.757 | C |
| HETATM | 9 | C | 0 | 0.872  | -3.546 | 7.886 | C |

|        |    |   |   |        |        |       |   |
|--------|----|---|---|--------|--------|-------|---|
| HETATM | 10 | C | 0 | -0.364 | -3.897 | 7.298 | C |
| HETATM | 11 | C | 0 | -1.540 | -3.433 | 7.929 | C |
| HETATM | 12 | C | 0 | -1.502 | -2.714 | 9.130 | C |
| HETATM | 13 | C | 0 | -0.256 | -2.449 | 9.700 | C |
| HETATM | 14 | C | 0 | 0.938  | -2.843 | 9.096 | C |
| HETATM | 15 | C | 0 | 1.355  | 3.806  | 7.927 | C |
| HETATM | 16 | C | 0 | 0.176  | 4.301  | 7.329 | C |
| HETATM | 17 | C | 0 | -1.120 | 3.249  | 9.131 | C |
| HETATM | 18 | C | 0 | 0.077  | 2.839  | 9.718 | C |
| HETATM | 19 | C | 0 | 1.319  | 3.094  | 9.135 | C |
| HETATM | 20 | C | 0 | 2.276  | -2.485 | 9.713 | C |
| HETATM | 21 | C | 0 | 2.594  | 2.575  | 9.774 | C |
| HETATM | 22 | C | 0 | 3.740  | 1.192  | 7.994 | C |
| HETATM | 23 | C | 0 | 4.079  | -0.028 | 7.372 | C |
| HETATM | 24 | C | 0 | 3.556  | -1.212 | 7.935 | C |
| HETATM | 25 | C | 0 | 2.816  | -1.196 | 9.125 | C |
| HETATM | 26 | C | 0 | 2.556  | 0.036  | 9.728 | C |
| HETATM | 27 | C | 0 | 2.985  | 1.241  | 9.171 | C |
| HETATM | 28 | O | 0 | 4.201  | 2.378  | 7.438 | O |
| HETATM | 29 | O | 0 | 2.576  | 4.129  | 7.356 | O |
| HETATM | 30 | O | 0 | -4.005 | 2.826  | 7.304 | O |
| HETATM | 31 | O | 0 | -2.230 | 4.425  | 7.354 | O |
| HETATM | 32 | O | 0 | 3.858  | -2.427 | 7.340 | O |
| HETATM | 33 | O | 0 | 2.046  | -3.995 | 7.300 | O |
| HETATM | 34 | O | 0 | -4.353 | -1.972 | 7.383 | O |
| HETATM | 35 | O | 0 | -2.767 | -3.750 | 7.366 | O |
| HETATM | 36 | C | 0 | -7.152 | 0.515  | 4.148 | C |



|        |    |   |   |        |        |       |   |
|--------|----|---|---|--------|--------|-------|---|
| HETATM | 37 | C | 0 | -7.430 | -0.047 | 5.406 | C |
| HETATM | 38 | C | 0 | -6.466 | -0.078 | 6.405 | C |
| HETATM | 39 | C | 0 | -5.183 | 0.459  | 6.197 | C |
| HETATM | 40 | C | 0 | -4.904 | 1.019  | 4.942 | C |
| HETATM | 41 | C | 0 | -5.869 | 1.046  | 3.935 | C |
| HETATM | 42 | C | 0 | 0.309  | 7.131  | 4.052 | C |
| HETATM | 43 | C | 0 | -0.310 | 7.443  | 5.276 | C |
| HETATM | 44 | C | 0 | -0.356 | 6.516  | 6.310 | C |
| HETATM | 45 | C | 0 | 0.216  | 5.240  | 6.171 | C |
| HETATM | 46 | C | 0 | 0.824  | 4.926  | 4.947 | C |
| HETATM | 47 | C | 0 | 0.870  | 5.852  | 3.906 | C |
| HETATM | 48 | C | 0 | 7.042  | -0.179 | 4.215 | C |
| HETATM | 49 | C | 0 | 7.300  | 0.454  | 5.444 | C |
| HETATM | 50 | C | 0 | 6.328  | 0.512  | 6.436 | C |
| HETATM | 51 | C | 0 | 5.058  | -0.059 | 6.247 | C |
| HETATM | 52 | C | 0 | 4.795  | -0.673 | 5.014 | C |
| HETATM | 53 | C | 0 | 5.767  | -0.733 | 4.016 | C |
| HETATM | 54 | C | 0 | -0.506 | -6.709 | 4.008 | C |
| HETATM | 55 | C | 0 | -1.253 | -6.912 | 5.181 | C |
| HETATM | 56 | C | 0 | -1.216 | -5.988 | 6.220 | C |
| HETATM | 57 | C | 0 | -0.440 | -4.819 | 6.129 | C |
| HETATM | 58 | C | 0 | 0.274  | -4.602 | 4.940 | C |
| HETATM | 59 | C | 0 | 0.250  | -5.531 | 3.902 | C |
| HETATM | 60 | C | 0 | -0.565 | -9.709 | 0.975 | C |
| HETATM | 61 | N | 0 | -1.709 | -9.315 | 1.568 | N |
| HETATM | 62 | C | 0 | -1.669 | -8.369 | 2.511 | C |
| HETATM | 63 | C | 0 | -0.494 | -7.725 | 2.932 | C |

|        |    |   |   |        |         |        |   |
|--------|----|---|---|--------|---------|--------|---|
| HETATM | 64 | C | 0 | 0.686  | -8.106  | 2.275  | C |
| HETATM | 65 | C | 0 | 0.653  | -9.097  | 1.301  | C |
| HETATM | 66 | C | 0 | -0.856 | -12.781 | -1.932 | C |
| HETATM | 67 | C | 0 | -1.946 | -11.969 | -1.586 | C |
| HETATM | 68 | N | 0 | -1.829 | -11.007 | -0.651 | N |
| HETATM | 69 | C | 0 | -0.644 | -10.807 | -0.033 | C |
| HETATM | 70 | C | 0 | 0.470  | -11.603 | -0.318 | C |
| HETATM | 71 | C | 0 | 0.359  | -12.603 | -1.282 | C |
| HETATM | 72 | C | 0 | 10.019 | -0.502  | 1.164  | C |
| HETATM | 73 | N | 0 | 9.155  | -1.510  | 1.395  | N |
| HETATM | 74 | C | 0 | 8.235  | -1.390  | 2.356  | C |
| HETATM | 75 | C | 0 | 8.089  | -0.257  | 3.173  | C |
| HETATM | 76 | C | 0 | 9.016  | 0.774   | 2.955  | C |
| HETATM | 77 | C | 0 | 9.978  | 0.653   | 1.961  | C |
| HETATM | 78 | C | 0 | 12.805 | -1.041  | -1.996 | C |
| HETATM | 79 | C | 0 | 12.007 | -2.086  | -1.509 | C |
| HETATM | 80 | N | 0 | 11.128 | -1.886  | -0.509 | N |
| HETATM | 81 | C | 0 | 11.003 | -0.662  | 0.050  | C |
| HETATM | 82 | C | 0 | 11.762 | 0.422   | -0.408 | C |
| HETATM | 83 | C | 0 | 12.676 | 0.226   | -1.441 | C |
| HETATM | 84 | C | 0 | 0.545  | 9.958   | 0.854  | C |
| HETATM | 85 | N | 0 | 1.566  | 9.114   | 1.105  | N |
| HETATM | 86 | C | 0 | 1.473  | 8.241   | 2.113  | C |
| HETATM | 87 | C | 0 | 0.358  | 8.126   | 2.959  | C |
| HETATM | 88 | C | 0 | -0.686 | 9.031   | 2.716  | C |
| HETATM | 89 | C | 0 | -0.594 | 9.945   | 1.674  | C |
| HETATM | 90 | C | 0 | 1.001  | 12.603  | -2.438 | C |

|        |     |   |   |         |        |        |   |
|--------|-----|---|---|---------|--------|--------|---|
| HETATM | 91  | C | 0 | -0.250  | 12.500 | -1.845 | C |
| HETATM | 92  | C | 0 | -0.420  | 11.632 | -0.768 | C |
| HETATM | 93  | C | 0 | 0.675   | 10.891 | -0.307 | C |
| HETATM | 94  | N | 0 | 1.884   | 10.990 | -0.903 | N |
| HETATM | 95  | C | 0 | 2.058   | 11.825 | -1.945 | C |
| HETATM | 96  | C | 0 | -10.154 | 0.657  | 1.103  | C |
| HETATM | 97  | C | 0 | -10.117 | -0.434 | 1.986  | C |
| HETATM | 98  | C | 0 | -9.140  | -0.496 | 2.969  | C |
| HETATM | 99  | C | 0 | -8.193  | 0.533  | 3.097  | C |
| HETATM | 100 | C | 0 | -8.323  | 1.594  | 2.187  | C |
| HETATM | 101 | N | 0 | -9.257  | 1.656  | 1.231  | N |
| HETATM | 102 | C | 0 | -13.087 | 1.032  | -1.942 | C |
| HETATM | 103 | C | 0 | -12.235 | 2.088  | -1.584 | C |
| HETATM | 104 | N | 0 | -11.304 | 1.938  | -0.625 | N |
| HETATM | 105 | C | 0 | -11.179 | 0.757  | 0.020  | C |
| HETATM | 106 | C | 0 | -11.984 | -0.338 | -0.314 | C |
| HETATM | 107 | C | 0 | -12.952 | -0.194 | -1.305 | C |
| HETATM | 108 | C | 0 | -3.100  | 0.609  | -8.884 | C |
| HETATM | 109 | C | 0 | -3.665  | 1.111  | -7.701 | C |
| HETATM | 110 | C | 0 | -3.251  | 2.345  | -7.152 | C |
| HETATM | 111 | C | 0 | -2.167  | 3.006  | -7.773 | C |
| HETATM | 112 | C | 0 | -1.577  | 2.519  | -8.944 | C |
| HETATM | 113 | C | 0 | -2.074  | 1.334  | -9.489 | C |
| HETATM | 114 | C | 0 | -3.558  | -0.715 | -9.466 | C |
| HETATM | 115 | C | 0 | -0.392  | 3.235  | -9.560 | C |
| HETATM | 116 | C | 0 | 3.281   | 1.887  | -7.734 | C |
| HETATM | 117 | C | 0 | 2.588   | 2.965  | -7.144 | C |

|              |   |        |        |        |   |
|--------------|---|--------|--------|--------|---|
| HETATM 118 C | 0 | 1.365  | 3.361  | -7.730 | C |
| HETATM 119 C | 0 | 0.906  | 2.779  | -8.921 | C |
| HETATM 120 C | 0 | 1.656  | 1.749  | -9.490 | C |
| HETATM 121 C | 0 | 2.830  | 1.271  | -8.907 | C |
| HETATM 122 C | 0 | -1.359 | -3.865 | -7.480 | C |
| HETATM 123 C | 0 | -2.590 | -3.437 | -6.932 | C |
| HETATM 124 C | 0 | -3.280 | -2.403 | -7.601 | C |
| HETATM 125 C | 0 | -2.821 | -1.865 | -8.809 | C |
| HETATM 126 C | 0 | -1.644 | -2.381 | -9.351 | C |
| HETATM 127 C | 0 | -0.895 | -3.368 | -8.708 | C |
| HETATM 128 C | 0 | 3.571  | 0.079  | -9.481 | C |
| HETATM 129 C | 0 | 0.404  | -3.869 | -9.311 | C |
| HETATM 130 C | 0 | 2.178  | -3.518 | -7.544 | C |
| HETATM 131 C | 0 | 3.256  | -2.815 | -6.966 | C |
| HETATM 132 C | 0 | 3.671  | -1.622 | -7.596 | C |
| HETATM 133 C | 0 | 3.109  | -1.202 | -8.812 | C |
| HETATM 134 C | 0 | 2.084  | -1.967 | -9.369 | C |
| HETATM 135 C | 0 | 1.588  | -3.112 | -8.746 | C |
| HETATM 136 O | 0 | 1.717  | -4.670 | -6.922 | O |
| HETATM 137 O | 0 | -0.665 | -4.880 | -6.844 | O |
| HETATM 138 O | 0 | -4.726 | 0.438  | -7.114 | O |
| HETATM 139 O | 0 | -4.478 | -1.943 | -7.073 | O |
| HETATM 140 O | 0 | 4.727  | -0.911 | -7.049 | O |
| HETATM 141 O | 0 | 4.473  | 1.465  | -7.164 | O |
| HETATM 142 O | 0 | -1.709 | 4.199  | -7.236 | O |
| HETATM 143 O | 0 | 0.672  | 4.422  | -7.172 | O |
| HETATM 144 C | 0 | -5.565 | 4.305  | -4.060 | C |

|        |     |   |   |        |        |        |   |
|--------|-----|---|---|--------|--------|--------|---|
| HETATM | 145 | C | 0 | -5.273 | 4.938  | -5.280 | C |
| HETATM | 146 | C | 0 | -4.510 | 4.300  | -6.252 | C |
| HETATM | 147 | C | 0 | -4.003 | 3.005  | -6.045 | C |
| HETATM | 148 | C | 0 | -4.274 | 2.385  | -4.817 | C |
| HETATM | 149 | C | 0 | -5.044 | 3.019  | -3.843 | C |
| HETATM | 150 | C | 0 | -4.469 | -5.651 | -3.718 | C |
| HETATM | 151 | C | 0 | -5.099 | -5.466 | -4.961 | C |
| HETATM | 152 | C | 0 | -4.490 | -4.729 | -5.969 | C |
| HETATM | 153 | C | 0 | -3.223 | -4.149 | -5.784 | C |
| HETATM | 154 | C | 0 | -2.601 | -4.319 | -4.538 | C |
| HETATM | 155 | C | 0 | -3.212 | -5.055 | -3.523 | C |
| HETATM | 156 | C | 0 | 5.535  | -4.545 | -3.716 | C |
| HETATM | 157 | C | 0 | 5.338  | -5.227 | -4.929 | C |
| HETATM | 158 | C | 0 | 4.586  | -4.662 | -5.952 | C |
| HETATM | 159 | C | 0 | 4.003  | -3.391 | -5.810 | C |
| HETATM | 160 | C | 0 | 4.187  | -2.716 | -4.595 | C |
| HETATM | 161 | C | 0 | 4.939  | -3.281 | -3.566 | C |
| HETATM | 162 | C | 0 | 4.421  | 5.302  | -3.994 | C |
| HETATM | 163 | C | 0 | 5.056  | 5.102  | -5.232 | C |
| HETATM | 164 | C | 0 | 4.460  | 4.332  | -6.224 | C |
| HETATM | 165 | C | 0 | 3.204  | 3.734  | -6.024 | C |
| HETATM | 166 | C | 0 | 2.577  | 3.921  | -4.784 | C |
| HETATM | 167 | C | 0 | 3.174  | 4.689  | -3.785 | C |
| HETATM | 168 | C | 0 | 6.172  | 7.756  | -0.962 | C |
| HETATM | 169 | N | 0 | 4.840  | 7.761  | -1.167 | N |
| HETATM | 170 | C | 0 | 4.312  | 6.986  | -2.120 | C |
| HETATM | 171 | C | 0 | 5.060  | 6.138  | -2.953 | C |

|              |   |        |        |        |   |
|--------------|---|--------|--------|--------|---|
| HETATM 172 C | 0 | 6.450  | 6.164  | -2.758 | C |
| HETATM 173 C | 0 | 7.005  | 6.969  | -1.773 | C |
| HETATM 174 C | 0 | 7.657  | 10.231 | 2.152  | C |
| HETATM 175 C | 0 | 6.343  | 10.331 | 1.673  | C |
| HETATM 176 N | 0 | 5.896  | 9.528  | 0.689  | N |
| HETATM 177 C | 0 | 8.033  | 8.450  | 0.592  | C |
| HETATM 178 H | 0 | 8.679  | 7.687  | 0.176  | H |
| HETATM 179 C | 0 | 6.717  | 8.607  | 0.138  | C |
| HETATM 180 C | 0 | 8.506  | 9.276  | 1.608  | C |
| HETATM 181 C | 0 | 7.903  | -6.193 | -0.560 | C |
| HETATM 182 C | 0 | 7.134  | -7.052 | -1.360 | C |
| HETATM 183 C | 0 | 6.359  | -6.531 | -2.387 | C |
| HETATM 184 C | 0 | 6.346  | -5.149 | -2.636 | C |
| HETATM 185 C | 0 | 7.179  | -4.375 | -1.812 | C |
| HETATM 186 N | 0 | 7.924  | -4.870 | -0.818 | N |
| HETATM 187 C | 0 | 10.267 | -7.563 | 2.691  | C |
| HETATM 188 C | 0 | 10.380 | -6.266 | 2.173  | C |
| HETATM 189 N | 0 | 9.613  | -5.855 | 1.145  | N |
| HETATM 190 C | 0 | 8.716  | -6.698 | 0.587  | C |
| HETATM 191 C | 0 | 8.548  | -7.999 | 1.077  | C |
| HETATM 192 C | 0 | 9.337  | -8.435 | 2.139  | C |
| HETATM 193 C | 0 | -6.253 | -8.072 | -0.678 | C |
| HETATM 194 C | 0 | -7.077 | -7.296 | -1.508 | C |
| HETATM 195 C | 0 | -6.511 | -6.495 | -2.490 | C |
| HETATM 196 C | 0 | -5.119 | -6.465 | -2.666 | C |
| HETATM 197 C | 0 | -4.379 | -7.294 | -1.807 | C |
| HETATM 198 N | 0 | -4.917 | -8.062 | -0.855 | N |

|              |   |         |         |        |   |
|--------------|---|---------|---------|--------|---|
| HETATM 199 C | 0 | -7.772  | -10.587 | 2.390  | C |
| HETATM 200 C | 0 | -8.624  | -9.646  | 1.827  | C |
| HETATM 201 C | 0 | -8.140  | -8.804  | 0.828  | C |
| HETATM 202 C | 0 | -6.811  | -8.934  | 0.407  | C |
| HETATM 203 N | 0 | -5.988  | -9.844  | 0.975  | N |
| HETATM 204 C | 0 | -6.444  | -10.658 | 1.946  | C |
| HETATM 205 C | 0 | -8.103  | 6.189   | -1.185 | C |
| HETATM 206 C | 0 | -7.140  | 6.958   | -1.856 | C |
| HETATM 207 C | 0 | -6.302  | 6.358   | -2.787 | C |
| HETATM 208 C | 0 | -6.408  | 4.984   | -3.052 | C |
| HETATM 209 C | 0 | -7.386  | 4.293   | -2.319 | C |
| HETATM 210 N | 0 | -8.199  | 4.866   | -1.425 | N |
| HETATM 211 C | 0 | -10.779 | 7.828   | 1.672  | C |
| HETATM 212 C | 0 | -10.105 | 8.700   | 0.827  | C |
| HETATM 213 C | 0 | -9.229  | 8.180   | -0.125 | C |
| HETATM 214 C | 0 | -9.047  | 6.794   | -0.198 | C |
| HETATM 215 N | 0 | -9.728  | 5.955   | 0.614  | N |
| HETATM 216 C | 0 | -10.581 | 6.446   | 1.531  | C |
| HETATM 217 C | 0 | 5.407   | 11.376  | 2.228  | C |
| HETATM 218 H | 0 | 4.373   | 11.061  | 2.045  | H |
| HETATM 219 H | 0 | 5.544   | 11.444  | 3.314  | H |
| HETATM 220 C | 0 | 5.618   | 12.791  | 1.614  | C |
| HETATM 221 C | 0 | 3.436   | 11.938  | -2.551 | C |
| HETATM 222 H | 0 | 4.001   | 11.027  | -2.325 | H |
| HETATM 223 H | 0 | 3.345   | 12.007  | -3.642 | H |
| HETATM 224 C | 0 | -11.330 | 5.478   | 2.420  | C |
| HETATM 225 H | 0 | -10.897 | 4.478   | 2.304  | H |

|               |   |         |         |        |    |
|---------------|---|---------|---------|--------|----|
| HETATM 226 H  | 0 | -11.165 | 5.781   | 3.462  | H  |
| HETATM 227 C  | 0 | -12.864 | 5.412   | 2.189  | C  |
| HETATM 228 C  | 0 | -1.054  | 3.973   | 7.936  | C  |
| HETATM 229 C  | 0 | -12.387 | 3.429   | -2.262 | C  |
| HETATM 230 H  | 0 | -11.418 | 3.942   | -2.291 | H  |
| HETATM 231 H  | 0 | -12.694 | 3.259   | -3.300 | H  |
| HETATM 232 C  | 0 | -5.493  | -11.676 | 2.528  | C  |
| HETATM 233 H  | 0 | -4.466  | -11.311 | 2.409  | H  |
| HETATM 234 H  | 0 | -5.684  | -11.773 | 3.603  | H  |
| HETATM 235 C  | 0 | -3.292  | -12.171 | -2.239 | C  |
| HETATM 236 C  | 0 | -4.063  | -13.418 | -1.720 | C  |
| HETATM 237 H  | 0 | -3.903  | -11.277 | -2.069 | H  |
| HETATM 238 H  | 0 | -3.155  | -12.275 | -3.322 | H  |
| HETATM 239 C  | 0 | 11.400  | -5.307  | 2.736  | C  |
| HETATM 240 H  | 0 | 11.089  | -4.281  | 2.507  | H  |
| HETATM 241 H  | 0 | 11.427  | -5.407  | 3.827  | H  |
| HETATM 242 C  | 0 | 12.838  | -5.532  | 2.184  | C  |
| HETATM 243 H  | 0 | 13.489  | -4.778  | 2.641  | H  |
| HETATM 244 H  | 0 | 13.199  | -6.511  | 2.525  | H  |
| HETATM 245 C  | 0 | 12.920  | -5.449  | 0.683  | C  |
| HETATM 246 H  | 0 | 12.593  | -6.329  | 0.126  | H  |
| HETATM 247 C  | 0 | 12.146  | -3.478  | -2.075 | C  |
| HETATM 248 H  | 0 | 11.227  | -4.039  | -1.870 | H  |
| HETATM 249 H  | 0 | 12.258  | -3.416  | -3.164 | H  |
| HETATM 250 Ag | 0 | -3.710  | -9.862  | 0.286  | Ag |
| HETATM 251 Ag | 0 | -9.740  | 3.644   | -0.045 | Ag |
| HETATM 252 Ag | 0 | 3.627   | 9.562   | -0.080 | Ag |



|        |     |    |   |        |        |        |    |
|--------|-----|----|---|--------|--------|--------|----|
| HETATM | 253 | Ag | 0 | 9.672  | -3.613 | 0.297  | Ag |
| HETATM | 254 | H  | 0 | -2.186 | 0.331  | 10.646 | H  |
| HETATM | 255 | H  | 0 | -2.352 | 2.731  | 10.807 | H  |
| HETATM | 256 | H  | 0 | -3.179 | 3.681  | 9.563  | H  |
| HETATM | 257 | H  | 0 | -2.624 | -2.054 | 10.833 | H  |
| HETATM | 258 | H  | 0 | -3.589 | -2.899 | 9.612  | H  |
| HETATM | 259 | H  | 0 | -0.214 | -1.911 | 10.644 | H  |
| HETATM | 260 | H  | 0 | 0.042  | 2.296  | 10.659 | H  |
| HETATM | 261 | H  | 0 | 2.154  | -2.364 | 10.794 | H  |
| HETATM | 262 | H  | 0 | 2.991  | -3.296 | 9.543  | H  |
| HETATM | 263 | H  | 0 | 1.988  | 0.057  | 10.655 | H  |
| HETATM | 264 | H  | 0 | 3.401  | 3.298  | 9.631  | H  |
| HETATM | 265 | H  | 0 | 2.434  | 2.455  | 10.850 | H  |
| HETATM | 266 | H  | 0 | -8.422 | -0.435 | 5.620  | H  |
| HETATM | 267 | H  | 0 | -6.711 | -0.507 | 7.371  | H  |
| HETATM | 268 | H  | 0 | -3.916 | 1.420  | 4.739  | H  |
| HETATM | 269 | H  | 0 | -5.608 | 1.458  | 2.963  | H  |
| HETATM | 270 | H  | 0 | -0.727 | 8.433  | 5.435  | H  |
| HETATM | 271 | H  | 0 | -0.826 | 6.788  | 7.249  | H  |
| HETATM | 272 | H  | 0 | 1.248  | 3.938  | 4.795  | H  |
| HETATM | 273 | H  | 0 | 1.323  | 5.566  | 2.960  | H  |
| HETATM | 274 | H  | 0 | 8.284  | 0.868  | 5.644  | H  |
| HETATM | 275 | H  | 0 | 6.561  | 0.988  | 7.383  | H  |
| HETATM | 276 | H  | 0 | 3.814  | -1.094 | 4.820  | H  |
| HETATM | 277 | H  | 0 | 5.522  | -1.195 | 3.063  | H  |
| HETATM | 278 | H  | 0 | -1.828 | -7.826 | 5.303  | H  |
| HETATM | 279 | H  | 0 | -1.777 | -6.184 | 7.127  | H  |

|              |   |         |         |         |   |
|--------------|---|---------|---------|---------|---|
| HETATM 280 H | 0 | 0.847   | -3.690  | 4.815   | H |
| HETATM 281 H | 0 | 0.807   | -5.329  | 2.991   | H |
| HETATM 282 H | 0 | -2.625  | -8.094  | 2.950   | H |
| HETATM 283 H | 0 | 1.630   | -7.644  | 2.549   | H |
| HETATM 284 H | 0 | 1.566   | -9.384  | 0.792   | H |
| HETATM 285 H | 0 | -0.974  | -13.544 | -2.695  | H |
| HETATM 286 H | 0 | 1.400   | -11.467 | 0.222   | H |
| HETATM 287 H | 0 | 1.209   | -13.235 | -1.518  | H |
| HETATM 288 H | 0 | 7.589   | -2.252  | 2.502   | H |
| HETATM 289 H | 0 | 8.975   | 1.678   | 3.556   | H |
| HETATM 290 H | 0 | 10.695  | 1.452   | 1.820   | H |
| HETATM 291 H | 0 | 13.507  | -1.228  | -2.802  | H |
| HETATM 292 H | 0 | 11.638  | 1.410   | 0.017   | H |
| HETATM 293 H | 0 | 13.273  | 1.055   | -1.808  | H |
| HETATM 294 H | 0 | 2.343   | 7.609   | 2.271   | H |
| HETATM 295 H | 0 | -1.578  | 9.011   | 3.334   | H |
| HETATM 296 H | 0 | -1.404  | 10.646  | 1.514   | H |
| HETATM 297 H | 0 | 1.168   | 13.270  | -3.278  | H |
| HETATM 298 H | 0 | -1.088  | 13.082  | -2.215  | H |
| HETATM 299 H | 0 | -1.396  | 11.530  | -0.313  | H |
| HETATM 300 H | 0 | -10.851 | -1.227  | 1.923   | H |
| HETATM 301 H | 0 | -9.105  | -1.352  | 3.637   | H |
| HETATM 302 H | 0 | -7.655  | 2.449   | 2.248   | H |
| HETATM 303 H | 0 | -13.833 | 1.180   | -2.716  | H |
| HETATM 304 H | 0 | -11.858 | -1.296  | 0.174   | H |
| HETATM 305 H | 0 | -13.588 | -1.032  | -1.576  | H |
| HETATM 306 H | 0 | -1.638  | 0.957   | -10.412 | H |

|              |   |        |        |         |   |
|--------------|---|--------|--------|---------|---|
| HETATM 307 H | 0 | -3.360 | -0.724 | -10.542 | H |
| HETATM 308 H | 0 | -4.636 | -0.833 | -9.319  | H |
| HETATM 309 H | 0 | -0.358 | 3.023  | -10.633 | H |
| HETATM 310 H | 0 | -0.507 | 4.315  | -9.432  | H |
| HETATM 311 H | 0 | 1.310  | 1.299  | -10.418 | H |
| HETATM 312 H | 0 | -1.292 | -1.995 | -10.306 | H |
| HETATM 313 H | 0 | 3.378  | 0.014  | -10.556 | H |
| HETATM 314 H | 0 | 4.647  | 0.206  | -9.336  | H |
| HETATM 315 H | 0 | 1.651  | -1.654 | -10.317 | H |
| HETATM 316 H | 0 | 0.516  | -4.938 | -9.108  | H |
| HETATM 317 H | 0 | 0.370  | -3.733 | -10.397 | H |
| HETATM 318 H | 0 | -5.682 | 5.922  | -5.490  | H |
| HETATM 319 H | 0 | -4.320 | 4.802  | -7.194  | H |
| HETATM 320 H | 0 | -3.863 | 1.403  | -4.606  | H |
| HETATM 321 H | 0 | -5.220 | 2.519  | -2.894  | H |
| HETATM 322 H | 0 | -6.057 | -5.937 | -5.159  | H |
| HETATM 323 H | 0 | -4.990 | -4.619 | -6.925  | H |
| HETATM 324 H | 0 | -1.636 | -3.860 | -4.350  | H |
| HETATM 325 H | 0 | -2.715 | -5.145 | -2.561  | H |
| HETATM 326 H | 0 | 5.810  | -6.192 | -5.091  | H |
| HETATM 327 H | 0 | 4.464  | -5.202 | -6.885  | H |
| HETATM 328 H | 0 | 3.721  | -1.751 | -4.435  | H |
| HETATM 329 H | 0 | 5.033  | -2.743 | -2.627  | H |
| HETATM 330 H | 0 | 6.007  | 5.584  | -5.438  | H |
| HETATM 331 H | 0 | 4.963  | 4.207  | -7.177  | H |
| HETATM 332 H | 0 | 1.624  | 3.442  | -4.586  | H |
| HETATM 333 H | 0 | 2.671  | 4.788  | -2.826  | H |

|              |   |         |         |        |   |
|--------------|---|---------|---------|--------|---|
| HETATM 334 H | 0 | 3.235   | 7.059   | -2.246 | H |
| HETATM 335 H | 0 | 7.096   | 5.544   | -3.373 | H |
| HETATM 336 H | 0 | 8.081   | 6.991   | -1.652 | H |
| HETATM 337 H | 0 | 7.994   | 10.892  | 2.944  | H |
| HETATM 338 H | 0 | 9.524   | 9.170   | 1.972  | H |
| HETATM 339 H | 0 | 7.145   | -8.122  | -1.197 | H |
| HETATM 340 H | 0 | 5.750   | -7.197  | -2.992 | H |
| HETATM 341 H | 0 | 7.264   | -3.304  | -1.978 | H |
| HETATM 342 H | 0 | 10.898  | -7.871  | 3.519  | H |
| HETATM 343 H | 0 | 7.805   | -8.664  | 0.654  | H |
| HETATM 344 H | 0 | 9.220   | -9.441  | 2.532  | H |
| HETATM 345 H | 0 | -8.155  | -7.324  | -1.404 | H |
| HETATM 346 H | 0 | -7.152  | -5.885  | -3.119 | H |
| HETATM 347 H | 0 | -3.299  | -7.360  | -1.911 | H |
| HETATM 348 H | 0 | -8.117  | -11.258 | 3.170  | H |
| HETATM 349 H | 0 | -9.653  | -9.560  | 2.164  | H |
| HETATM 350 H | 0 | -8.789  | -8.050  | 0.401  | H |
| HETATM 351 H | 0 | -7.026  | 8.014   | -1.642 | H |
| HETATM 352 H | 0 | -5.550  | 6.952   | -3.298 | H |
| HETATM 353 H | 0 | -7.538  | 3.230   | -2.485 | H |
| HETATM 354 H | 0 | -11.463 | 8.202   | 2.427  | H |
| HETATM 355 H | 0 | -10.259 | 9.772   | 0.901  | H |
| HETATM 356 H | 0 | -8.720  | 8.848   | -0.808 | H |
| HETATM 357 C | 0 | 3.291   | 3.129   | 6.654  | C |
| HETATM 358 C | 0 | 0.535   | -4.570  | -6.150 | C |
| HETATM 359 H | 0 | 2.596   | 2.451   | 6.144  | H |
| HETATM 360 H | 0 | 3.910   | 3.676   | 5.941  | H |

|              |   |         |        |        |   |
|--------------|---|---------|--------|--------|---|
| HETATM 361 H | 0 | 0.470   | -3.573 | -5.698 | H |
| HETATM 362 H | 0 | 0.622   | -5.347 | -5.390 | H |
| HETATM 363 C | 0 | -2.988  | 3.505  | 6.590  | C |
| HETATM 364 C | 0 | -4.463  | -0.725 | -6.350 | C |
| HETATM 365 H | 0 | -2.319  | 2.784  | 6.105  | H |
| HETATM 366 H | 0 | -3.519  | 4.112  | 5.855  | H |
| HETATM 367 H | 0 | -3.509  | -0.623 | -5.818 | H |
| HETATM 368 H | 0 | -5.299  | -0.797 | -5.653 | H |
| HETATM 369 C | 0 | -3.447  | -2.752 | 6.625  | C |
| HETATM 370 C | 0 | -0.525  | 4.163  | -6.454 | C |
| HETATM 371 H | 0 | -2.725  | -2.104 | 6.114  | H |
| HETATM 372 H | 0 | -4.066  | -3.298 | 5.913  | H |
| HETATM 373 H | 0 | -0.455  | 3.209  | -5.921 | H |
| HETATM 374 H | 0 | -0.618  | 5.000  | -5.761 | H |
| HETATM 375 C | 0 | 2.844   | -3.067 | 6.589  | C |
| HETATM 376 C | 0 | 4.451   | 0.296  | -6.361 | C |
| HETATM 377 H | 0 | 2.203   | -2.312 | 6.114  | H |
| HETATM 378 H | 0 | 3.375   | -3.663 | 5.845  | H |
| HETATM 379 H | 0 | -13.293 | 4.880  | 3.044  | H |
| HETATM 380 H | 0 | -13.277 | 6.429  | 2.240  | H |
| HETATM 381 C | 0 | -13.326 | 4.731  | 0.916  | C |
| HETATM 382 H | 0 | -14.069 | 3.944  | 1.050  | H |
| HETATM 383 C | 0 | -12.942 | 5.024  | -0.332 | C |
| HETATM 384 H | 0 | -12.220 | 5.822  | -0.504 | H |
| HETATM 385 C | 0 | -13.446 | 4.344  | -1.576 | C |
| HETATM 386 H | 0 | -14.344 | 3.755  | -1.354 | H |
| HETATM 387 H | 0 | -13.743 | 5.107  | -2.308 | H |

|              |   |        |         |        |   |
|--------------|---|--------|---------|--------|---|
| HETATM 388 H | 0 | 6.607  | 13.162  | 1.912  | H |
| HETATM 389 C | 0 | 5.489  | 12.816  | 0.114  | C |
| HETATM 390 H | 0 | 6.352  | 12.469  | -0.456 | H |
| HETATM 391 H | 0 | 4.879  | 13.461  | 2.069  | H |
| HETATM 392 C | 0 | 4.394  | 13.206  | -0.547 | C |
| HETATM 393 H | 0 | 3.534  | 13.559  | 0.024  | H |
| HETATM 394 C | 0 | 4.240  | 13.170  | -2.044 | C |
| HETATM 395 H | 0 | 3.744  | 14.085  | -2.392 | H |
| HETATM 396 H | 0 | 5.225  | 13.142  | -2.525 | H |
| HETATM 397 H | 0 | -5.031 | -13.443 | -2.233 | H |
| HETATM 398 H | 0 | -3.521 | -14.323 | -2.026 | H |
| HETATM 399 C | 0 | -4.267 | -13.430 | -0.228 | C |
| HETATM 400 H | 0 | -3.413 | -13.739 | 0.378  | H |
| HETATM 401 C | 0 | -5.405 | -13.090 | 0.388  | C |
| HETATM 402 H | 0 | -6.261 | -12.790 | -0.219 | H |
| HETATM 403 C | 0 | -5.604 | -13.086 | 1.881  | C |
| HETATM 404 H | 0 | -4.856 | -13.727 | 2.362  | H |
| HETATM 405 H | 0 | -6.586 | -13.511 | 2.124  | H |
| HETATM 406 C | 0 | 13.338 | -4.376  | 0.004  | C |
| HETATM 407 H | 0 | 13.671 | -3.499  | 0.561  | H |
| HETATM 408 C | 0 | 13.358 | -4.266  | -1.498 | C |
| HETATM 409 H | 0 | 14.286 | -3.779  | -1.825 | H |
| HETATM 410 H | 0 | 13.348 | -5.264  | -1.950 | H |
| HETATM 411 C | 0 | 2.324  | 1.059   | -1.800 | C |
| HETATM 412 O | 0 | 2.485  | -0.024  | -2.364 | O |
| HETATM 413 O | 0 | 1.382  | 1.930   | -2.124 | O |
| HETATM 414 H | 0 | 0.878  | 1.605   | -2.931 | H |

|        |     |   |   |        |        |        |   |
|--------|-----|---|---|--------|--------|--------|---|
| HETATM | 415 | C | 0 | 0.359  | 0.130  | -5.001 | C |
| HETATM | 416 | O | 0 | 1.144  | -0.835 | -4.539 | O |
| HETATM | 417 | H | 0 | 1.574  | -0.549 | -3.679 | H |
| HETATM | 418 | O | 0 | 0.143  | 1.175  | -4.381 | O |
| HETATM | 419 | C | 0 | -0.218 | -0.165 | -6.353 | C |
| HETATM | 420 | H | 0 | 0.577  | -0.101 | -7.104 | H |
| HETATM | 421 | H | 0 | -0.614 | -1.183 | -6.390 | H |
| HETATM | 422 | H | 0 | -0.997 | 0.556  | -6.597 | H |
| HETATM | 423 | C | 0 | 3.200  | 1.529  | -0.668 | C |
| HETATM | 424 | H | 0 | 5.277  | 0.416  | -5.661 | H |
| HETATM | 425 | H | 0 | 3.491  | 0.222  | -5.837 | H |
| HETATM | 426 | H | 0 | 2.585  | 1.876  | 0.167  | H |
| HETATM | 427 | H | 0 | 3.860  | 0.723  | -0.346 | H |
| HETATM | 428 | H | 0 | 3.800  | 2.380  | -1.010 | H |

END

CONNECT 1 2 6 7

CONNECT 2 1 3 30

CONNECT 3 2 4 39

CONNECT 4 3 5 34

CONNECT 5 4 6 8

CONNECT 6 5 1 254

CONNECT 7 1 17 255 256

CONNECT 8 5 12 257 258

CONNECT 9 10 14 33

CONNECT 10 9 11 57

CONNECT 11 10 12 35

CONNECT 12 8 11 13

CONNECT 13 12 14 259  
CONNECT 14 13 9 20  
CONNECT 15 16 19 29  
CONNECT 16 15 45 228  
CONNECT 17 7 18 228  
CONNECT 18 17 19 260  
CONNECT 19 18 15 21  
CONNECT 20 14 25 261 262  
CONNECT 21 19 27 264 265  
CONNECT 22 23 27 28  
CONNECT 23 22 24 51  
CONNECT 24 23 25 32  
CONNECT 25 20 24 26  
CONNECT 26 25 27 263  
CONNECT 27 26 21 22  
CONNECT 28 22 357  
CONNECT 29 15 357  
CONNECT 30 2 363  
CONNECT 31 228 363  
CONNECT 32 24 375  
CONNECT 33 9 375  
CONNECT 34 4 369  
CONNECT 35 11 369  
CONNECT 36 37 41 99  
CONNECT 37 36 38 266  
CONNECT 38 37 39 267  
CONNECT 39 38 3 40



CONNECT 40 39 41 268  
CONNECT 41 36 40 269  
CONNECT 42 43 47 87  
CONNECT 43 42 44 270  
CONNECT 44 43 45 271  
CONNECT 45 16 44 46  
CONNECT 46 45 47 272  
CONNECT 47 42 46 273  
CONNECT 48 49 53 75  
CONNECT 49 48 50 274  
CONNECT 50 49 51 275  
CONNECT 51 23 50 52  
CONNECT 52 51 53 276  
CONNECT 53 52 48 277  
CONNECT 54 55 59 63  
CONNECT 55 54 56 278  
CONNECT 56 55 57 279  
CONNECT 57 56 10 58  
CONNECT 58 57 59 280  
CONNECT 59 54 58 281  
CONNECT 60 61 65 69  
CONNECT 61 60 62  
CONNECT 62 61 63 282  
CONNECT 63 54 62 64  
CONNECT 64 63 65 283  
CONNECT 65 60 64 284  
CONNECT 66 67 71 285

CONNECT 67 66 68 235  
CONNECT 68 67 69  
CONNECT 69 60 68 70  
CONNECT 70 69 71 286  
CONNECT 71 66 70 287  
CONNECT 72 73 77 81  
CONNECT 73 72 74  
CONNECT 74 73 75 288  
CONNECT 75 48 74 76  
CONNECT 76 75 77 289  
CONNECT 77 72 76 290  
CONNECT 78 79 83 291  
CONNECT 79 78 80 247  
CONNECT 80 79 81  
CONNECT 81 72 80 82  
CONNECT 82 81 83 292  
CONNECT 83 82 78 293  
CONNECT 84 85 89 93  
CONNECT 85 84 86  
CONNECT 86 85 87 294  
CONNECT 87 42 86 88  
CONNECT 88 87 89 295  
CONNECT 89 84 88 296  
CONNECT 90 91 95 297  
CONNECT 91 90 92 298  
CONNECT 92 91 93 299  
CONNECT 93 84 92 94

CONNECT 94 93 95

CONNECT 95 90 94 221

CONNECT 96 97 101 105

CONNECT 97 96 98 300

CONNECT 98 97 99 301

CONNECT 99 36 98 100

CONNECT 100 99 101 302

CONNECT 101 96 100

CONNECT 102 103 107 303

CONNECT 103 102 104 229

CONNECT 104 103 105

CONNECT 105 96 104 106

CONNECT 106 105 107 304

CONNECT 107 106 102 305

CONNECT 108 109 113 114

CONNECT 109 108 110 138

CONNECT 110 109 111 147

CONNECT 111 110 112 142

CONNECT 112 111 113 115

CONNECT 113 108 112 306

CONNECT 114 108 125 307 308

CONNECT 115 112 119 309 310

CONNECT 116 117 121 141

CONNECT 117 116 118 165

CONNECT 118 117 119 143

CONNECT 119 115 118 120

CONNECT 120 119 121 311

CONNECT 121 116 120 128

CONNECT 122 123 127 137

CONNECT 123 122 124 153

CONNECT 124 123 125 139

CONNECT 125 114 124 126

CONNECT 126 125 127 312

CONNECT 127 126 122 129

CONNECT 128 121 133 313 314

CONNECT 129 127 135 316 317

CONNECT 130 131 135 136

CONNECT 131 130 132 159

CONNECT 132 131 133 140

CONNECT 133 128 132 134

CONNECT 134 133 135 315

CONNECT 135 129 134 130

CONNECT 136 130 358

CONNECT 137 122 358

CONNECT 138 109 364

CONNECT 139 124 364

CONNECT 140 132 376

CONNECT 141 116 376

CONNECT 142 111 370

CONNECT 143 118 370

CONNECT 144 145 149 208

CONNECT 145 144 146 318

CONNECT 146 145 147 319

CONNECT 147 110 146 148

CONNECT 148 147 149 320  
CONNECT 149 144 148 321  
CONNECT 150 151 155 196  
CONNECT 151 150 152 322  
CONNECT 152 151 153 323  
CONNECT 153 123 152 154  
CONNECT 154 153 155 324  
CONNECT 155 150 154 325  
CONNECT 156 157 161 184  
CONNECT 157 156 158 326  
CONNECT 158 157 159 327  
CONNECT 159 131 158 160  
CONNECT 160 159 161 328  
CONNECT 161 156 160 329  
CONNECT 162 163 167 171  
CONNECT 163 162 164 330  
CONNECT 164 163 165 331  
CONNECT 165 117 164 166  
CONNECT 166 165 167 332  
CONNECT 167 162 166 333  
CONNECT 168 169 173 179  
CONNECT 169 168 170  
CONNECT 170 169 171 334  
CONNECT 171 162 170 172  
CONNECT 172 171 173 335  
CONNECT 173 172 168 336  
CONNECT 174 175 180 337

CONNECT 175 174 176 217  
CONNECT 176 175 179  
CONNECT 177 178 179 180  
CONNECT 178 177  
CONNECT 179 168 176 177  
CONNECT 180 174 177 338  
CONNECT 181 182 186 190  
CONNECT 182 181 183 339  
CONNECT 183 182 184 340  
CONNECT 184 183 156 185  
CONNECT 185 184 186 341  
CONNECT 186 181 185  
CONNECT 187 188 192 342  
CONNECT 188 187 189 239  
CONNECT 189 188 190  
CONNECT 190 181 189 191  
CONNECT 191 190 192 343  
CONNECT 192 187 191 344  
CONNECT 193 194 198 202  
CONNECT 194 193 195 345  
CONNECT 195 194 196 346  
CONNECT 196 195 150 197  
CONNECT 197 196 198 347  
CONNECT 198 193 197  
CONNECT 199 200 204 348  
CONNECT 200 199 201 349  
CONNECT 201 200 202 350

CONNECT 202 193 201 203

CONNECT 203 202 204

CONNECT 204 199 203 232

CONNECT 205 206 210 214

CONNECT 206 205 207 351

CONNECT 207 206 208 352

CONNECT 208 144 207 209

CONNECT 209 208 210 353

CONNECT 210 209 205

CONNECT 211 212 216 354

CONNECT 212 211 213 355

CONNECT 213 212 214 356

CONNECT 214 205 213 215

CONNECT 215 214 216

CONNECT 216 215 211 224

CONNECT 217 175 218 219 220

CONNECT 218 217

CONNECT 219 217

CONNECT 220 217 388 389 391

CONNECT 221 95 222 223 394

CONNECT 222 221

CONNECT 223 221

CONNECT 224 216 225 226 227

CONNECT 225 224

CONNECT 226 224

CONNECT 227 224 379 380 381

CONNECT 228 16 17 31

CONNECT 229 103 230 231 385

CONNECT 230 229

CONNECT 231 229

CONNECT 232 204 233 234 403

CONNECT 233 232

CONNECT 234 232

CONNECT 235 67 236 237 238

CONNECT 236 235 397 398 399

CONNECT 237 235

CONNECT 238 235

CONNECT 239 188 240 241 242

CONNECT 240 239

CONNECT 241 239

CONNECT 242 239 243 244 245

CONNECT 243 242

CONNECT 244 242

CONNECT 245 242 246 406

CONNECT 246 245

CONNECT 247 79 248 249 408

CONNECT 248 247

CONNECT 249 247

CONNECT 254 6

CONNECT 255 7

CONNECT 256 7

CONNECT 257 8

CONNECT 258 8

CONNECT 259 13



CONNECT 260 18  
CONNECT 261 20  
CONNECT 262 20  
CONNECT 263 26  
CONNECT 264 21  
CONNECT 265 21  
CONNECT 266 37  
CONNECT 267 38  
CONNECT 268 40  
CONNECT 269 41  
CONNECT 270 43  
CONNECT 271 44  
CONNECT 272 46  
CONNECT 273 47  
CONNECT 274 49  
CONNECT 275 50  
CONNECT 276 52  
CONNECT 277 53  
CONNECT 278 55  
CONNECT 279 56  
CONNECT 280 58  
CONNECT 281 59  
CONNECT 282 62  
CONNECT 283 64  
CONNECT 284 65  
CONNECT 285 66  
CONNECT 286 70

CONNECT 287 71  
CONNECT 288 74  
CONNECT 289 76  
CONNECT 290 77  
CONNECT 291 78  
CONNECT 292 82  
CONNECT 293 83  
CONNECT 294 86  
CONNECT 295 88  
CONNECT 296 89  
CONNECT 297 90  
CONNECT 298 91  
CONNECT 299 92  
CONNECT 300 97  
CONNECT 301 98  
CONNECT 302 100  
CONNECT 303 102  
CONNECT 304 106  
CONNECT 305 107  
CONNECT 306 113  
CONNECT 307 114  
CONNECT 308 114  
CONNECT 309 115  
CONNECT 310 115  
CONNECT 311 120  
CONNECT 312 126  
CONNECT 313 128

CONNECT 314 128  
CONNECT 315 134  
CONNECT 316 129  
CONNECT 317 129  
CONNECT 318 145  
CONNECT 319 146  
CONNECT 320 148  
CONNECT 321 149  
CONNECT 322 151  
CONNECT 323 152  
CONNECT 324 154  
CONNECT 325 155  
CONNECT 326 157  
CONNECT 327 158  
CONNECT 328 160  
CONNECT 329 161  
CONNECT 330 163  
CONNECT 331 164  
CONNECT 332 166  
CONNECT 333 167  
CONNECT 334 170  
CONNECT 335 172  
CONNECT 336 173  
CONNECT 337 174  
CONNECT 338 180  
CONNECT 339 182  
CONNECT 340 183

CONNECT 341 185

CONNECT 342 187

CONNECT 343 191

CONNECT 344 192

CONNECT 345 194

CONNECT 346 195

CONNECT 347 197

CONNECT 348 199

CONNECT 349 200

CONNECT 350 201

CONNECT 351 206

CONNECT 352 207

CONNECT 353 209

CONNECT 354 211

CONNECT 355 212

CONNECT 356 213

CONNECT 357 28 29 359 360

CONNECT 358 137 136 361 362

CONNECT 359 357

CONNECT 360 357

CONNECT 361 358

CONNECT 362 358

CONNECT 363 30 31 365 366

CONNECT 364 138 139 367 368

CONNECT 365 363

CONNECT 366 363

CONNECT 367 364

CONNECT 368 364

CONNECT 369 34 35 371 372

CONNECT 370 142 143 373 374

CONNECT 371 369

CONNECT 372 369

CONNECT 373 370

CONNECT 374 370

CONNECT 375 32 33 377 378

CONNECT 376 140 141 424 425

CONNECT 377 375

CONNECT 378 375

CONNECT 379 227

CONNECT 380 227

CONNECT 381 227 382 383

CONNECT 382 381

CONNECT 383 381 384 385

CONNECT 384 383

CONNECT 385 229 383 386 387

CONNECT 386 385

CONNECT 387 385

CONNECT 388 220

CONNECT 389 220 390 392

CONNECT 390 389

CONNECT 391 220

CONNECT 392 389 393 394

CONNECT 393 392

CONNECT 394 221 392 395 396

CONNECT 395 394

CONNECT 396 394

CONNECT 397 236

CONNECT 398 236

CONNECT 399 236 400 401

CONNECT 400 399

CONNECT 401 399 402 403

CONNECT 402 401

CONNECT 403 232 401 404 405

CONNECT 404 403

CONNECT 405 403

CONNECT 406 245 407 408

CONNECT 407 406

CONNECT 408 247 406 409 410

CONNECT 409 408

CONNECT 410 408

CONNECT 411 412 413 423

CONNECT 412 411

CONNECT 413 411 414

CONNECT 414 413

CONNECT 415 416 418 419

CONNECT 416 415 417

CONNECT 417 416

CONNECT 418 415

CONNECT 419 415 420 421 422

CONNECT 420 419

CONNECT 421 419

CONNECT 422 419

CONNECT 423 411 426 427 428

CONNECT 424 376

CONNECT 425 376

CONNECT 426 423

CONNECT 427 423

CONNECT 428 423

**Table S3.** PDB file of **G1a•G2a•M1Ag**

REMARK 1 File created by GaussView 6.1.1

|        |    |   |   |        |        |         |   |
|--------|----|---|---|--------|--------|---------|---|
| HETATM | 1  | C | 0 | 2.506  | 3.459  | -9.343  | C |
| HETATM | 2  | C | 0 | 3.221  | 3.448  | -8.134  | C |
| HETATM | 3  | C | 0 | 3.930  | 2.307  | -7.712  | C |
| HETATM | 4  | C | 0 | 3.824  | 1.139  | -8.493  | C |
| HETATM | 5  | C | 0 | 3.102  | 1.111  | -9.692  | C |
| HETATM | 6  | C | 0 | 2.474  | 2.288  | -10.105 | C |
| HETATM | 7  | C | 0 | 1.743  | 4.697  | -9.781  | C |
| HETATM | 8  | C | 0 | 2.954  | -0.185 | -10.469 | C |
| HETATM | 9  | C | 0 | -0.398 | -2.373 | -8.825  | C |
| HETATM | 10 | C | 0 | 0.881  | -2.555 | -8.249  | C |
| HETATM | 11 | C | 0 | 1.960  | -1.832 | -8.806  | C |
| HETATM | 12 | C | 0 | 1.796  | -1.002 | -9.924  | C |
| HETATM | 13 | C | 0 | 0.521  | -0.900 | -10.485 | C |
| HETATM | 14 | C | 0 | -0.587 | -1.562 | -9.954  | C |
| HETATM | 15 | C | 0 | -2.161 | 4.657  | -7.915  | C |
| HETATM | 16 | C | 0 | -1.078 | 5.247  | -7.226  | C |
| HETATM | 17 | C | 0 | 0.363  | 4.734  | -9.151  | C |
| HETATM | 18 | C | 0 | -0.752 | 4.216  | -9.811  | C |

|        |    |   |   |        |        |         |   |
|--------|----|---|---|--------|--------|---------|---|
| HETATM | 19 | C | 0 | -2.015 | 4.157  | -9.218  | C |
| HETATM | 20 | C | 0 | -1.968 | -1.372 | -10.556 | C |
| HETATM | 21 | C | 0 | -3.183 | 3.525  | -9.954  | C |
| HETATM | 22 | C | 0 | -4.070 | 1.731  | -8.409  | C |
| HETATM | 23 | C | 0 | -4.177 | 0.400  | -7.958  | C |
| HETATM | 24 | C | 0 | -3.464 | -0.588 | -8.666  | C |
| HETATM | 25 | C | 0 | -2.739 | -0.286 | -9.827  | C |
| HETATM | 26 | C | 0 | -2.705 | 1.042  | -10.257 | C |
| HETATM | 27 | C | 0 | -3.340 | 2.069  | -9.555  | C |
| HETATM | 28 | O | 0 | -4.732 | 2.728  | -7.710  | O |
| HETATM | 29 | O | 0 | -3.416 | 4.687  | -7.324  | O |
| HETATM | 30 | O | 0 | 3.312  | 4.604  | -7.377  | O |
| HETATM | 31 | O | 0 | 1.263  | 5.821  | -7.208  | O |
| HETATM | 32 | O | 0 | -3.543 | -1.904 | -8.236  | O |
| HETATM | 33 | O | 0 | -1.468 | -3.097 | -8.325  | O |
| HETATM | 34 | O | 0 | 4.495  | -0.000 | -8.075  | O |
| HETATM | 35 | O | 0 | 3.222  | -2.004 | -8.262  | O |
| HETATM | 36 | C | 0 | 6.713  | 2.303  | -4.395  | C |
| HETATM | 37 | C | 0 | 7.149  | 2.249  | -5.731  | C |
| HETATM | 38 | C | 0 | 6.239  | 2.262  | -6.780  | C |
| HETATM | 39 | C | 0 | 4.857  | 2.333  | -6.540  | C |
| HETATM | 40 | C | 0 | 4.417  | 2.403  | -5.211  | C |
| HETATM | 41 | C | 0 | 5.331  | 2.390  | -4.156  | C |
| HETATM | 42 | C | 0 | -1.530 | 7.319  | -3.440  | C |
| HETATM | 43 | C | 0 | -1.009 | 7.959  | -4.579  | C |
| HETATM | 44 | C | 0 | -0.871 | 7.283  | -5.785  | C |
| HETATM | 45 | C | 0 | -1.255 | 5.937  | -5.915  | C |



|        |    |   |   |        |         |        |   |
|--------|----|---|---|--------|---------|--------|---|
| HETATM | 46 | C | 0 | -1.794 | 5.304   | -4.784 | C |
| HETATM | 47 | C | 0 | -1.926 | 5.977   | -3.570 | C |
| HETATM | 48 | C | 0 | -6.821 | -0.598  | -4.673 | C |
| HETATM | 49 | C | 0 | -7.315 | -0.076  | -5.882 | C |
| HETATM | 50 | C | 0 | -6.457 | 0.246   | -6.928 | C |
| HETATM | 51 | C | 0 | -5.070 | 0.057   | -6.811 | C |
| HETATM | 52 | C | 0 | -4.577 | -0.456  | -5.604 | C |
| HETATM | 53 | C | 0 | -5.434 | -0.779  | -4.553 | C |
| HETATM | 54 | C | 0 | 1.430  | -5.548  | -5.162 | C |
| HETATM | 55 | C | 0 | 2.232  | -5.536  | -6.316 | C |
| HETATM | 56 | C | 0 | 2.067  | -4.556  | -7.292 | C |
| HETATM | 57 | C | 0 | 1.105  | -3.541  | -7.150 | C |
| HETATM | 58 | C | 0 | 0.344  | -3.528  | -5.970 | C |
| HETATM | 59 | C | 0 | 0.494  | -4.515  | -5.000 | C |
| HETATM | 60 | C | 0 | 1.771  | -8.783  | -2.399 | C |
| HETATM | 61 | N | 0 | 2.875  | -8.137  | -2.824 | N |
| HETATM | 62 | C | 0 | 2.752  | -7.117  | -3.681 | C |
| HETATM | 63 | C | 0 | 1.523  | -6.645  | -4.171 | C |
| HETATM | 64 | C | 0 | 0.376  | -7.280  | -3.672 | C |
| HETATM | 65 | C | 0 | 0.497  | -8.347  | -2.791 | C |
| HETATM | 66 | C | 0 | 2.347  | -12.153 | 0.111  | C |
| HETATM | 67 | C | 0 | 3.315  | -11.148 | -0.031 | C |
| HETATM | 68 | N | 0 | 3.106  | -10.086 | -0.832 | N |
| HETATM | 69 | C | 0 | 1.950  | -9.977  | -1.522 | C |
| HETATM | 70 | C | 0 | 0.959  | -10.962 | -1.442 | C |
| HETATM | 71 | C | 0 | 1.162  | -12.061 | -0.609 | C |
| HETATM | 72 | C | 0 | -9.393 | -1.574  | -1.402 | C |

|        |    |   |   |         |        |        |   |
|--------|----|---|---|---------|--------|--------|---|
| HETATM | 73 | N | 0 | -8.331  | -2.354 | -1.692 | N |
| HETATM | 74 | C | 0 | -7.542  | -2.034 | -2.724 | C |
| HETATM | 75 | C | 0 | -7.739  | -0.918 | -3.556 | C |
| HETATM | 76 | C | 0 | -8.868  | -0.136 | -3.271 | C |
| HETATM | 77 | C | 0 | -9.693  | -0.462 | -2.203 | C |
| HETATM | 78 | C | 0 | -11.840 | -2.712 | 1.871  | C |
| HETATM | 79 | C | 0 | -10.933 | -3.594 | 1.268  | C |
| HETATM | 80 | N | 0 | -10.146 | -3.198 | 0.250  | N |
| HETATM | 81 | C | 0 | -10.240 | -1.939 | -0.228 | C |
| HETATM | 82 | C | 0 | -11.112 | -1.007 | 0.350  | C |
| HETATM | 83 | C | 0 | -11.920 | -1.403 | 1.413  | C |
| HETATM | 84 | C | 0 | -1.862  | 9.339  | 0.317  | C |
| HETATM | 85 | N | 0 | -2.767  | 8.405  | -0.040 | N |
| HETATM | 86 | C | 0 | -2.653  | 7.788  | -1.222 | C |
| HETATM | 87 | C | 0 | -1.627  | 8.038  | -2.150 | C |
| HETATM | 88 | C | 0 | -0.703  | 9.028  | -1.780 | C |
| HETATM | 89 | C | 0 | -0.822  | 9.680  | -0.561 | C |
| HETATM | 90 | C | 0 | -2.409  | 11.269 | 4.059  | C |
| HETATM | 91 | C | 0 | -1.191  | 11.426 | 3.409  | C |
| HETATM | 92 | C | 0 | -0.988  | 10.787 | 2.188  | C |
| HETATM | 93 | C | 0 | -2.015  | 10.004 | 1.646  | C |
| HETATM | 94 | N | 0 | -3.181  | 9.833  | 2.305  | N |
| HETATM | 95 | C | 0 | -3.392  | 10.454 | 3.481  | C |
| HETATM | 96 | C | 0 | 9.531   | 2.142  | -1.185 | C |
| HETATM | 97 | C | 0 | 9.760   | 1.386  | -2.344 | C |
| HETATM | 98 | C | 0 | 8.847   | 1.429  | -3.388 | C |
| HETATM | 99 | C | 0 | 7.699   | 2.232  | -3.292 | C |

|              |   |        |        |        |   |
|--------------|---|--------|--------|--------|---|
| HETATM 100 C | 0 | 7.566  | 2.971  | -2.105 | C |
| HETATM 101 N | 0 | 8.442  | 2.934  | -1.093 | N |
| HETATM 102 C | 0 | 12.324 | 2.202  | 2.004  | C |
| HETATM 103 C | 0 | 11.362 | 3.208  | 1.831  | C |
| HETATM 104 N | 0 | 10.464 | 3.147  | 0.829  | N |
| HETATM 105 C | 0 | 10.495 | 2.118  | -0.045 | C |
| HETATM 106 C | 0 | 11.412 | 1.070  | 0.098  | C |
| HETATM 107 C | 0 | 12.338 | 1.117  | 1.137  | C |
| HETATM 108 C | 0 | 3.173  | -0.366 | 9.686  | C |
| HETATM 109 C | 0 | 3.646  | 0.318  | 8.555  | C |
| HETATM 110 C | 0 | 3.076  | 1.542  | 8.141  | C |
| HETATM 111 C | 0 | 1.944  | 2.010  | 8.847  | C |
| HETATM 112 C | 0 | 1.442  | 1.341  | 9.970  | C |
| HETATM 113 C | 0 | 2.086  | 0.171  | 10.379 | C |
| HETATM 114 C | 0 | 3.790  | -1.684 | 10.121 | C |
| HETATM 115 C | 0 | 0.197  | 1.849  | 10.671 | C |
| HETATM 116 C | 0 | -3.336 | 0.311  | 8.720  | C |
| HETATM 117 C | 0 | -2.775 | 1.516  | 8.251  | C |
| HETATM 118 C | 0 | -1.602 | 1.983  | 8.879  | C |
| HETATM 119 C | 0 | -1.060 | 1.328  | 9.995  | C |
| HETATM 120 C | 0 | -1.680 | 0.161  | 10.446 | C |
| HETATM 121 C | 0 | -2.801 | -0.380 | 9.813  | C |
| HETATM 122 C | 0 | 1.931  | -4.838 | 7.813  | C |
| HETATM 123 C | 0 | 3.079  | -4.194 | 7.303  | C |
| HETATM 124 C | 0 | 3.668  | -3.178 | 8.084  | C |
| HETATM 125 C | 0 | 3.180  | -2.840 | 9.351  | C |
| HETATM 126 C | 0 | 2.082  | -3.550 | 9.840  | C |

|              |   |        |        |        |   |
|--------------|---|--------|--------|--------|---|
| HETATM 127 C | 0 | 1.438  | -4.540 | 9.094  | C |
| HETATM 128 C | 0 | -3.387 | -1.713 | 10.236 | C |
| HETATM 129 C | 0 | 0.204  | -5.241 | 9.635  | C |
| HETATM 130 C | 0 | -1.603 | -4.882 | 7.899  | C |
| HETATM 131 C | 0 | -2.739 | -4.221 | 7.389  | C |
| HETATM 132 C | 0 | -3.291 | -3.171 | 8.153  | C |
| HETATM 133 C | 0 | -2.785 | -2.844 | 9.421  | C |
| HETATM 134 C | 0 | -1.681 | -3.556 | 9.896  | C |
| HETATM 135 C | 0 | -1.061 | -4.560 | 9.149  | C |
| HETATM 136 O | 0 | -1.034 | -5.907 | 7.160  | O |
| HETATM 137 O | 0 | 1.355  | -5.853 | 7.071  | O |
| HETATM 138 O | 0 | 4.763  | -0.155 | 7.884  | O |
| HETATM 139 O | 0 | 4.794  | -2.528 | 7.598  | O |
| HETATM 140 O | 0 | -4.423 | -2.531 | 7.674  | O |
| HETATM 141 O | 0 | -4.476 | -0.182 | 8.102  | O |
| HETATM 142 O | 0 | 1.347  | 3.193  | 8.444  | O |
| HETATM 143 O | 0 | -1.040 | 3.169  | 8.434  | O |
| HETATM 144 C | 0 | 4.901  | 4.088  | 5.146  | C |
| HETATM 145 C | 0 | 4.660  | 4.536  | 6.457  | C |
| HETATM 146 C | 0 | 4.070  | 3.705  | 7.401  | C |
| HETATM 147 C | 0 | 3.693  | 2.389  | 7.079  | C |
| HETATM 148 C | 0 | 3.934  | 1.943  | 5.771  | C |
| HETATM 149 C | 0 | 4.529  | 2.774  | 4.821  | C |
| HETATM 150 C | 0 | 5.058  | -5.478 | 3.668  | C |
| HETATM 151 C | 0 | 5.672  | -5.593 | 4.928  | C |
| HETATM 152 C | 0 | 5.022  | -5.174 | 6.082  | C |
| HETATM 153 C | 0 | 3.728  | -4.629 | 6.030  | C |

|              |   |        |        |        |   |
|--------------|---|--------|--------|--------|---|
| HETATM 154 C | 0 | 3.111  | -4.519 | 4.775  | C |
| HETATM 155 C | 0 | 3.763  | -4.936 | 3.614  | C |
| HETATM 156 C | 0 | -4.620 | -5.630 | 3.749  | C |
| HETATM 157 C | 0 | -4.528 | -6.442 | 4.893  | C |
| HETATM 158 C | 0 | -3.916 | -5.980 | 6.053  | C |
| HETATM 159 C | 0 | -3.378 | -4.684 | 6.121  | C |
| HETATM 160 C | 0 | -3.470 | -3.874 | 4.981  | C |
| HETATM 161 C | 0 | -4.076 | -4.336 | 3.814  | C |
| HETATM 162 C | 0 | -4.870 | 3.830  | 5.247  | C |
| HETATM 163 C | 0 | -5.449 | 3.539  | 6.495  | C |
| HETATM 164 C | 0 | -4.764 | 2.791  | 7.445  | C |
| HETATM 165 C | 0 | -3.471 | 2.306  | 7.191  | C |
| HETATM 166 C | 0 | -2.890 | 2.594  | 5.948  | C |
| HETATM 167 C | 0 | -3.577 | 3.343  | 4.992  | C |
| HETATM 168 C | 0 | -6.982 | 6.114  | 2.313  | C |
| HETATM 169 N | 0 | -5.649 | 6.262  | 2.464  | N |
| HETATM 170 C | 0 | -5.004 | 5.538  | 3.386  | C |
| HETATM 171 C | 0 | -5.625 | 4.608  | 4.238  | C |
| HETATM 172 C | 0 | -7.015 | 4.482  | 4.093  | C |
| HETATM 173 C | 0 | -7.692 | 5.232  | 3.141  | C |
| HETATM 174 C | 0 | -8.917 | 8.529  | -0.592 | C |
| HETATM 175 C | 0 | -7.619 | 8.797  | -0.134 | C |
| HETATM 176 N | 0 | -7.019 | 7.998  | 0.769  | N |
| HETATM 177 C | 0 | -8.960 | 6.595  | 0.827  | C |
| HETATM 178 H | 0 | -9.464 | 5.710  | 1.195  | H |
| HETATM 179 C | 0 | -7.672 | 6.927  | 1.268  | C |
| HETATM 180 C | 0 | -9.586 | 7.409  | -0.114 | C |

|              |   |        |        |        |   |
|--------------|---|--------|--------|--------|---|
| HETATM 181 C | 0 | -6.447 | -7.036 | 0.148  | C |
| HETATM 182 C | 0 | -5.727 | -7.933 | 0.951  | C |
| HETATM 183 C | 0 | -5.129 | -7.488 | 2.121  | C |
| HETATM 184 C | 0 | -5.248 | -6.145 | 2.511  | C |
| HETATM 185 C | 0 | -6.019 | -5.330 | 1.664  | C |
| HETATM 186 N | 0 | -6.596 | -5.751 | 0.532  | N |
| HETATM 187 C | 0 | -8.372 | -8.274 | -3.425 | C |
| HETATM 188 C | 0 | -8.712 | -7.088 | -2.759 | C |
| HETATM 189 N | 0 | -8.063 | -6.703 | -1.644 | N |
| HETATM 190 C | 0 | -7.084 | -7.476 | -1.129 | C |
| HETATM 191 C | 0 | -6.684 | -8.658 | -1.765 | C |
| HETATM 192 C | 0 | -7.339 | -9.058 | -2.927 | C |
| HETATM 193 C | 0 | 7.099  | -6.759 | 0.135  | C |
| HETATM 194 C | 0 | 7.831  | -6.178 | 1.182  | C |
| HETATM 195 C | 0 | 7.175  | -5.750 | 2.327  | C |
| HETATM 196 C | 0 | 5.785  | -5.905 | 2.449  | C |
| HETATM 197 C | 0 | 5.142  | -6.516 | 1.359  | C |
| HETATM 198 N | 0 | 5.766  | -6.927 | 0.249  | N |
| HETATM 199 C | 0 | 8.981  | -8.235 | -3.372 | C |
| HETATM 200 C | 0 | 9.666  | -7.306 | -2.597 | C |
| HETATM 201 C | 0 | 9.056  | -6.795 | -1.454 | C |
| HETATM 202 C | 0 | 7.770  | -7.232 | -1.112 | C |
| HETATM 203 N | 0 | 7.103  | -8.109 | -1.893 | N |
| HETATM 204 C | 0 | 7.685  | -8.614 | -2.997 | C |
| HETATM 205 C | 0 | 6.808  | 6.698  | 2.347  | C |
| HETATM 206 C | 0 | 5.839  | 7.212  | 3.222  | C |
| HETATM 207 C | 0 | 5.205  | 6.369  | 4.124  | C |

|        |     |   |   |        |        |        |   |
|--------|-----|---|---|--------|--------|--------|---|
| HETATM | 208 | C | 0 | 5.520  | 5.002  | 4.159  | C |
| HETATM | 209 | C | 0 | 6.471  | 4.570  | 3.221  | C |
| HETATM | 210 | N | 0 | 7.090  | 5.378  | 2.351  | N |
| HETATM | 211 | C | 0 | 8.993  | 9.147  | -0.345 | C |
| HETATM | 212 | C | 0 | 8.260  | 9.764  | 0.659  | C |
| HETATM | 213 | C | 0 | 7.542  | 8.975  | 1.556  | C |
| HETATM | 214 | C | 0 | 7.566  | 7.583  | 1.411  | C |
| HETATM | 215 | N | 0 | 8.296  | 6.995  | 0.437  | N |
| HETATM | 216 | C | 0 | 9.007  | 7.746  | -0.423 | C |
| HETATM | 217 | C | 0 | -6.878 | 10.025 | -0.603 | C |
| HETATM | 218 | H | 0 | -5.800 | 9.848  | -0.515 | H |
| HETATM | 219 | H | 0 | -7.098 | 10.200 | -1.663 | H |
| HETATM | 220 | C | 0 | -7.243 | 11.312 | 0.195  | C |
| HETATM | 221 | C | 0 | -4.739 | 10.293 | 4.143  | C |
| HETATM | 222 | H | 0 | -5.183 | 9.343  | 3.824  | H |
| HETATM | 223 | H | 0 | -4.605 | 10.245 | 5.231  | H |
| HETATM | 224 | C | 0 | 9.842  | 7.060  | -1.479 | C |
| HETATM | 225 | H | 0 | 9.558  | 6.004  | -1.536 | H |
| HETATM | 226 | H | 0 | 9.602  | 7.513  | -2.450 | H |
| HETATM | 227 | C | 0 | 11.379 | 7.179  | -1.273 | C |
| HETATM | 228 | C | 0 | 0.186  | 5.245  | -7.859 | C |
| HETATM | 229 | C | 0 | 11.361 | 4.409  | 2.744  | C |
| HETATM | 230 | H | 0 | 10.337 | 4.779  | 2.875  | H |
| HETATM | 231 | H | 0 | 11.721 | 4.098  | 3.731  | H |
| HETATM | 232 | C | 0 | 6.919  | -9.637 | -3.799 | C |
| HETATM | 233 | H | 0 | 5.845  | -9.448 | -3.684 | H |
| HETATM | 234 | H | 0 | 7.161  | -9.521 | -4.862 | H |

|               |   |         |         |         |    |
|---------------|---|---------|---------|---------|----|
| HETATM 235 C  | 0 | 4.641   | -11.256 | 0.681   | C  |
| HETATM 236 C  | 0 | 5.624   | -12.264 | 0.018   | C  |
| HETATM 237 H  | 0 | 5.109   | -10.265 | 0.708   | H  |
| HETATM 238 H  | 0 | 4.472   | -11.568 | 1.719   | H  |
| HETATM 239 C  | 0 | -9.860  | -6.239  | -3.247  | C  |
| HETATM 240 H  | 0 | -9.708  | -5.206  | -2.914  | H  |
| HETATM 241 H  | 0 | -9.871  | -6.236  | -4.343  | H  |
| HETATM 242 C  | 0 | -11.248 | -6.732  | -2.740  | C  |
| HETATM 243 H  | 0 | -12.005 | -6.039  | -3.126  | H  |
| HETATM 244 H  | 0 | -11.459 | -7.712  | -3.185  | H  |
| HETATM 245 C  | 0 | -11.340 | -6.817  | -1.239  | C  |
| HETATM 246 H  | 0 | -10.880 | -7.689  | -0.771  | H  |
| HETATM 247 C  | 0 | -10.856 | -5.036  | 1.709   | C  |
| HETATM 248 H  | 0 | -9.865  | -5.432  | 1.464   | H  |
| HETATM 249 H  | 0 | -10.975 | -5.091  | 2.797   | H  |
| HETATM 250 Ag | 0 | 4.821   | -8.520  | -1.371  | Ag |
| HETATM 251 Ag | 0 | 8.607   | 4.625   | 0.637   | Ag |
| HETATM 252 Ag | 0 | -4.721  | 8.239   | 1.389   | Ag |
| HETATM 253 Ag | 0 | -8.369  | -4.550  | -0.625  | Ag |
| HETATM 254 H  | 0 | 1.927   | 2.290   | -11.045 | H  |
| HETATM 255 H  | 0 | 1.643   | 4.691   | -10.871 | H  |
| HETATM 256 H  | 0 | 2.302   | 5.593   | -9.497  | H  |
| HETATM 257 H  | 0 | 2.771   | 0.041   | -11.524 | H  |
| HETATM 258 H  | 0 | 3.879   | -0.763  | -10.401 | H  |
| HETATM 259 H  | 0 | 0.386   | -0.275  | -11.365 | H  |
| HETATM 260 H  | 0 | -0.632  | 3.839   | -10.825 | H  |
| HETATM 261 H  | 0 | -1.866  | -1.097  | -11.610 | H  |



|        |     |   |   |        |         |         |   |
|--------|-----|---|---|--------|---------|---------|---|
| HETATM | 262 | H | 0 | -2.524 | -2.313  | -10.506 | H |
| HETATM | 263 | H | 0 | -2.149 | 1.288   | -11.160 | H |
| HETATM | 264 | H | 0 | -4.104 | 4.071   | -9.728  | H |
| HETATM | 265 | H | 0 | -3.007 | 3.591   | -11.032 | H |
| HETATM | 266 | H | 0 | 8.212  | 2.219   | -5.953  | H |
| HETATM | 267 | H | 0 | 6.600  | 2.219   | -7.803  | H |
| HETATM | 268 | H | 0 | 3.352  | 2.423   | -5.000  | H |
| HETATM | 269 | H | 0 | 4.961  | 2.402   | -3.134  | H |
| HETATM | 270 | H | 0 | -0.733 | 9.008   | -4.532  | H |
| HETATM | 271 | H | 0 | -0.467 | 7.806   | -6.645  | H |
| HETATM | 272 | H | 0 | -2.095 | 4.264   | -4.842  | H |
| HETATM | 273 | H | 0 | -2.311 | 5.439   | -2.707  | H |
| HETATM | 274 | H | 0 | -8.385 | 0.052   | -6.019  | H |
| HETATM | 275 | H | 0 | -6.864 | 0.639   | -7.854  | H |
| HETATM | 276 | H | 0 | -3.507 | -0.571  | -5.472  | H |
| HETATM | 277 | H | 0 | -5.014 | -1.137  | -3.616  | H |
| HETATM | 278 | H | 0 | 2.954  | -6.332  | -6.479  | H |
| HETATM | 279 | H | 0 | 2.675  | -4.591  | -8.189  | H |
| HETATM | 280 | H | 0 | -0.369 | -2.729  | -5.802  | H |
| HETATM | 281 | H | 0 | -0.111 | -4.475  | -4.098  | H |
| HETATM | 282 | H | 0 | 3.679  | -6.641  | -3.990  | H |
| HETATM | 283 | H | 0 | -0.606 | -6.956  | -4.002  | H |
| HETATM | 284 | H | 0 | -0.393 | -8.834  | -2.409  | H |
| HETATM | 285 | H | 0 | 2.536  | -12.995 | 0.769   | H |
| HETATM | 286 | H | 0 | 0.059  | -10.893 | -2.040  | H |
| HETATM | 287 | H | 0 | 0.408  | -12.839 | -0.534  | H |
| HETATM | 288 | H | 0 | -6.716 | -2.714  | -2.916  | H |

|              |   |         |        |        |   |
|--------------|---|---------|--------|--------|---|
| HETATM 289 H | 0 | -9.093  | 0.736  | -3.879 | H |
| HETATM 290 H | 0 | -10.575 | 0.137  | -2.009 | H |
| HETATM 291 H | 0 | -12.465 | -3.057 | 2.689  | H |
| HETATM 292 H | 0 | -11.150 | 0.015  | -0.007 | H |
| HETATM 293 H | 0 | -12.601 | -0.696 | 1.877  | H |
| HETATM 294 H | 0 | -3.433  | 7.068  | -1.454 | H |
| HETATM 295 H | 0 | 0.119   | 9.280  | -2.443 | H |
| HETATM 296 H | 0 | -0.113  | 10.458 | -0.307 | H |
| HETATM 297 H | 0 | -2.604  | 11.761 | 5.007  | H |
| HETATM 298 H | 0 | -0.407  | 12.038 | 3.844  | H |
| HETATM 299 H | 0 | -0.037  | 10.891 | 1.681  | H |
| HETATM 300 H | 0 | 10.656  | 0.786  | -2.445 | H |
| HETATM 301 H | 0 | 9.018   | 0.832  | -4.278 | H |
| HETATM 302 H | 0 | 6.723   | 3.644  | -1.975 | H |
| HETATM 303 H | 0 | 13.040  | 2.276  | 2.816  | H |
| HETATM 304 H | 0 | 11.398  | 0.222  | -0.576 | H |
| HETATM 305 H | 0 | 13.059  | 0.315  | 1.267  | H |
| HETATM 306 H | 0 | 1.719   | -0.348 | 11.261 | H |
| HETATM 307 H | 0 | 3.616   | -1.827 | 11.192 | H |
| HETATM 308 H | 0 | 4.871   | -1.659 | 9.955  | H |
| HETATM 309 H | 0 | 0.208   | 1.516  | 11.714 | H |
| HETATM 310 H | 0 | 0.192   | 2.942  | 10.665 | H |
| HETATM 311 H | 0 | -1.268  | -0.351 | 11.313 | H |
| HETATM 312 H | 0 | 1.706   | -3.316 | 10.833 | H |
| HETATM 313 H | 0 | -3.177  | -1.884 | 11.297 | H |
| HETATM 314 H | 0 | -4.472  | -1.699 | 10.104 | H |
| HETATM 315 H | 0 | -1.285  | -3.313 | 10.880 | H |

|              |   |         |        |        |   |
|--------------|---|---------|--------|--------|---|
| HETATM 316 H | 0 | 0.206   | -6.287 | 9.314  | H |
| HETATM 317 H | 0 | 0.231   | -5.223 | 10.729 | H |
| HETATM 318 H | 0 | 4.967   | 5.535  | 6.752  | H |
| HETATM 319 H | 0 | 3.907   | 4.073  | 8.408  | H |
| HETATM 320 H | 0 | 3.630   | 0.943  | 5.478  | H |
| HETATM 321 H | 0 | 4.673   | 2.405  | 3.809  | H |
| HETATM 322 H | 0 | 6.658   | -6.040 | 5.012  | H |
| HETATM 323 H | 0 | 5.516   | -5.278 | 7.043  | H |
| HETATM 324 H | 0 | 2.122   | -4.074 | 4.701  | H |
| HETATM 325 H | 0 | 3.272   | -4.804 | 2.653  | H |
| HETATM 326 H | 0 | -4.966  | -7.437 | 4.889  | H |
| HETATM 327 H | 0 | -3.864  | -6.624 | 6.924  | H |
| HETATM 328 H | 0 | -3.031  | -2.883 | 4.985  | H |
| HETATM 329 H | 0 | -4.080  | -3.696 | 2.936  | H |
| HETATM 330 H | 0 | -6.434  | 3.927  | 6.739  | H |
| HETATM 331 H | 0 | -5.231  | 2.587  | 8.403  | H |
| HETATM 332 H | 0 | -1.907  | 2.201  | 5.713  | H |
| HETATM 333 H | 0 | -3.114  | 3.515  | 4.023  | H |
| HETATM 334 H | 0 | -3.937  | 5.721  | 3.469  | H |
| HETATM 335 H | 0 | -7.565  | 3.788  | 4.721  | H |
| HETATM 336 H | 0 | -8.768  | 5.142  | 3.061  | H |
| HETATM 337 H | 0 | -9.380  | 9.190  | -1.318 | H |
| HETATM 338 H | 0 | -10.585 | 7.170  | -0.468 | H |
| HETATM 339 H | 0 | -5.648  | -8.979 | 0.677  | H |
| HETATM 340 H | 0 | -4.558  | -8.181 | 2.731  | H |
| HETATM 341 H | 0 | -6.194  | -4.289 | 1.925  | H |
| HETATM 342 H | 0 | -8.912  | -8.564 | -4.321 | H |

|              |   |        |        |        |   |
|--------------|---|--------|--------|--------|---|
| HETATM 343 H | 0 | -5.867 | -9.251 | -1.374 | H |
| HETATM 344 H | 0 | -7.044 | -9.972 | -3.436 | H |
| HETATM 345 H | 0 | 8.908  | -6.078 | 1.118  | H |
| HETATM 346 H | 0 | 7.742  | -5.287 | 3.129  | H |
| HETATM 347 H | 0 | 4.072  | -6.704 | 1.395  | H |
| HETATM 348 H | 0 | 9.432  | -8.660 | -4.263 | H |
| HETATM 349 H | 0 | 10.663 | -6.980 | -2.878 | H |
| HETATM 350 H | 0 | 9.571  | -6.055 | -0.853 | H |
| HETATM 351 H | 0 | 5.567  | 8.259  | 3.195  | H |
| HETATM 352 H | 0 | 4.450  | 6.768  | 4.794  | H |
| HETATM 353 H | 0 | 6.771  | 3.526  | 3.191  | H |
| HETATM 354 H | 0 | 9.565  | 9.733  | -1.058 | H |
| HETATM 355 H | 0 | 8.252  | 10.846 | 0.754  | H |
| HETATM 356 H | 0 | 6.997  | 9.445  | 2.364  | H |
| HETATM 357 C | 0 | -3.971 | 3.496  | -6.796 | C |
| HETATM 358 C | 0 | 0.126  | -5.608 | 6.402  | C |
| HETATM 359 H | 0 | -3.184 | 2.869  | -6.356 | H |
| HETATM 360 H | 0 | -4.680 | 3.832  | -6.039 | H |
| HETATM 361 H | 0 | 0.083  | -4.574 | 6.048  | H |
| HETATM 362 H | 0 | 0.117  | -6.318 | 5.574  | H |
| HETATM 363 C | 0 | 2.207  | 4.970  | -6.570 | C |
| HETATM 364 C | 0 | 4.624  | -1.256 | 7.004  | C |
| HETATM 365 H | 0 | 1.707  | 4.078  | -6.181 | H |
| HETATM 366 H | 0 | 2.632  | 5.573  | -5.768 | H |
| HETATM 367 H | 0 | 3.654  | -1.212 | 6.491  | H |
| HETATM 368 H | 0 | 5.449  | -1.155 | 6.298  | H |
| HETATM 369 C | 0 | 3.747  | -0.997 | -7.409 | C |

|              |   |        |        |        |   |
|--------------|---|--------|--------|--------|---|
| HETATM 370 C | 0 | 0.155  | 3.110  | 7.677  | C |
| HETATM 371 H | 0 | 2.942  | -0.540 | -6.822 | H |
| HETATM 372 H | 0 | 4.460  | -1.516 | -6.768 | H |
| HETATM 373 H | 0 | 0.170  | 2.207  | 7.056  | H |
| HETATM 374 H | 0 | 0.146  | 4.014  | 7.067  | H |
| HETATM 375 C | 0 | -2.437 | -2.434 | -7.533 | C |
| HETATM 376 C | 0 | -4.311 | -1.219 | 7.152  | C |
| HETATM 377 H | 0 | -1.959 | -1.639 | -6.947 | H |
| HETATM 378 H | 0 | -2.853 | -3.210 | -6.890 | H |
| HETATM 379 H | 0 | 11.853 | 6.892  | -2.217 | H |
| HETATM 380 H | 0 | 11.635 | 8.237  | -1.124 | H |
| HETATM 381 C | 0 | 11.972 | 6.340  | -0.158 | C |
| HETATM 382 H | 0 | 12.756 | 5.644  | -0.460 | H |
| HETATM 383 C | 0 | 11.649 | 6.397  | 1.139  | C |
| HETATM 384 H | 0 | 10.882 | 7.095  | 1.475  | H |
| HETATM 385 C | 0 | 12.275 | 5.563  | 2.225  | C |
| HETATM 386 H | 0 | 13.226 | 5.139  | 1.881  | H |
| HETATM 387 H | 0 | 12.509 | 6.207  | 3.082  | H |
| HETATM 388 H | 0 | -8.290 | 11.571 | -0.013 | H |
| HETATM 389 C | 0 | -7.034 | 11.178 | 1.680  | C |
| HETATM 390 H | 0 | -7.807 | 10.645 | 2.235  | H |
| HETATM 391 H | 0 | -6.631 | 12.130 | -0.202 | H |
| HETATM 392 C | 0 | -5.969 | 11.640 | 2.343  | C |
| HETATM 393 H | 0 | -5.198 | 12.179 | 1.790  | H |
| HETATM 394 C | 0 | -5.731 | 11.448 | 3.818  | C |
| HETATM 395 H | 0 | -5.347 | 12.378 | 4.259  | H |
| HETATM 396 H | 0 | -6.675 | 11.223 | 4.327  | H |

|              |   |         |         |        |   |
|--------------|---|---------|---------|--------|---|
| HETATM 397 H | 0 | 6.565   | -12.225 | 0.580  | H |
| HETATM 398 H | 0 | 5.225   | -13.280 | 0.142  | H |
| HETATM 399 C | 0 | 5.879   | -11.996 | -1.442 | C |
| HETATM 400 H | 0 | 5.104   | -12.319 | -2.138 | H |
| HETATM 401 C | 0 | 6.971   | -11.396 | -1.928 | C |
| HETATM 402 H | 0 | 7.750   | -11.081 | -1.232 | H |
| HETATM 403 C | 0 | 7.216   | -11.108 | -3.386 | C |
| HETATM 404 H | 0 | 6.588   | -11.756 | -4.008 | H |
| HETATM 405 H | 0 | 8.258   | -11.341 | -3.639 | H |
| HETATM 406 C | 0 | -11.913 | -5.895  | -0.459 | C |
| HETATM 407 H | 0 | -12.378 | -5.027  | -0.929 | H |
| HETATM 408 C | 0 | -11.939 | -5.939  | 1.046  | C |
| HETATM 409 H | 0 | -12.927 | -5.632  | 1.412  | H |
| HETATM 410 H | 0 | -11.774 | -6.963  | 1.398  | H |
| HETATM 411 C | 0 | -1.413  | -0.781  | 2.441  | C |
| HETATM 412 O | 0 | -1.472  | -1.866  | 3.039  | O |
| HETATM 413 O | 0 | -1.179  | 0.377   | 3.040  | O |
| HETATM 414 H | 0 | -1.004  | 0.222   | 4.019  | H |
| HETATM 415 C | 0 | -0.195  | -1.104  | 6.044  | C |
| HETATM 416 O | 0 | -0.270  | -2.236  | 5.357  | O |
| HETATM 417 H | 0 | -0.727  | -2.082  | 4.472  | H |
| HETATM 418 O | 0 | -0.553  | -0.015  | 5.585  | O |
| HETATM 419 C | 0 | 0.334   | -1.277  | 7.432  | C |
| HETATM 420 H | 0 | -0.485  | -1.608  | 8.080  | H |
| HETATM 421 H | 0 | 1.105   | -2.048  | 7.459  | H |
| HETATM 422 H | 0 | 0.716   | -0.332  | 7.813  | H |
| HETATM 423 C | 0 | -1.561  | -0.728  | 0.986  | C |

|        |     |   |   |        |        |        |   |
|--------|-----|---|---|--------|--------|--------|---|
| HETATM | 424 | C | 0 | -1.333 | 0.388  | 0.266  | C |
| HETATM | 425 | H | 0 | -1.780 | -1.688 | 0.532  | H |
| HETATM | 426 | H | 0 | -1.105 | 1.300  | 0.813  | H |
| HETATM | 427 | C | 0 | -1.305 | 0.492  | -1.188 | C |
| HETATM | 428 | C | 0 | -1.529 | -0.610 | -2.035 | C |
| HETATM | 429 | C | 0 | -0.989 | 1.730  | -1.775 | C |
| HETATM | 430 | C | 0 | -0.877 | 1.875  | -3.154 | C |
| HETATM | 431 | C | 0 | -1.415 | -0.480 | -3.411 | C |
| HETATM | 432 | C | 0 | -1.084 | 0.759  | -3.964 | C |
| HETATM | 433 | H | 0 | -0.813 | 2.590  | -1.135 | H |
| HETATM | 434 | H | 0 | -0.618 | 2.831  | -3.590 | H |
| HETATM | 435 | H | 0 | -1.773 | -1.581 | -1.616 | H |
| HETATM | 436 | H | 0 | -1.566 | -1.330 | -4.067 | H |
| HETATM | 437 | O | 0 | -1.034 | 0.823  | -5.351 | O |
| HETATM | 438 | C | 0 | 0.079  | 1.366  | -5.970 | C |
| HETATM | 439 | O | 0 | 1.011  | 1.816  | -5.349 | O |
| HETATM | 440 | C | 0 | -0.065 | 1.275  | -7.456 | C |
| HETATM | 441 | H | 0 | -0.036 | 0.224  | -7.763 | H |
| HETATM | 442 | H | 0 | -1.028 | 1.679  | -7.777 | H |
| HETATM | 443 | H | 0 | 0.747  | 1.814  | -7.939 | H |
| HETATM | 444 | H | 0 | -5.153 | -1.119 | 6.466  | H |
| HETATM | 445 | H | 0 | -3.355 | -1.093 | 6.630  | H |

END

CONNECT 1 2 6 7

CONNECT 2 1 3 30

CONNECT 3 2 4 39

CONNECT 4 3 5 34

CONNECT 5 4 6 8  
CONNECT 6 5 1 254  
CONNECT 7 1 17 255 256  
CONNECT 8 5 12 257 258  
CONNECT 9 10 14 33  
CONNECT 10 9 11 57  
CONNECT 11 10 12 35  
CONNECT 12 11 8 13  
CONNECT 13 12 14 259  
CONNECT 14 9 13 20  
CONNECT 15 16 19 29  
CONNECT 16 15 45 228  
CONNECT 17 7 18 228  
CONNECT 18 17 19 260  
CONNECT 19 18 15 21  
CONNECT 20 14 25 261 262  
CONNECT 21 19 27 264 265  
CONNECT 22 23 27 28  
CONNECT 23 22 24 51  
CONNECT 24 23 25 32  
CONNECT 25 20 24 26  
CONNECT 26 25 27 263  
CONNECT 27 22 26 21  
CONNECT 28 22 357  
CONNECT 29 15 357  
CONNECT 30 2 363  
CONNECT 31 228 363



CONNECT 32 24 375  
CONNECT 33 9 375  
CONNECT 34 4 369  
CONNECT 35 11 369  
CONNECT 36 37 41 99  
CONNECT 37 36 38 266  
CONNECT 38 37 39 267  
CONNECT 39 3 38 40  
CONNECT 40 39 41 268  
CONNECT 41 36 40 269  
CONNECT 42 43 47 87  
CONNECT 43 42 44 270  
CONNECT 44 43 45 271  
CONNECT 45 16 44 46  
CONNECT 46 45 47 272  
CONNECT 47 42 46 273  
CONNECT 48 49 53 75  
CONNECT 49 48 50 274  
CONNECT 50 49 51 275  
CONNECT 51 23 50 52  
CONNECT 52 51 53 276  
CONNECT 53 48 52 277  
CONNECT 54 55 59 63  
CONNECT 55 54 56 278  
CONNECT 56 55 57 279  
CONNECT 57 56 10 58  
CONNECT 58 57 59 280

CONNECT 59 54 58 281  
CONNECT 60 61 65 69  
CONNECT 61 60 62  
CONNECT 62 61 63 282  
CONNECT 63 54 62 64  
CONNECT 64 63 65 283  
CONNECT 65 64 60 284  
CONNECT 66 67 71 285  
CONNECT 67 66 68 235  
CONNECT 68 67 69  
CONNECT 69 60 68 70  
CONNECT 70 69 71 286  
CONNECT 71 70 66 287  
CONNECT 72 73 77 81  
CONNECT 73 72 74  
CONNECT 74 73 75 288  
CONNECT 75 48 74 76  
CONNECT 76 75 77 289  
CONNECT 77 76 72 290  
CONNECT 78 79 83 291  
CONNECT 79 78 80 247  
CONNECT 80 79 81  
CONNECT 81 80 72 82  
CONNECT 82 81 83 292  
CONNECT 83 78 82 293  
CONNECT 84 85 89 93  
CONNECT 85 84 86

CONNECT 86 85 87 294  
CONNECT 87 42 86 88  
CONNECT 88 87 89 295  
CONNECT 89 84 88 296  
CONNECT 90 91 95 297  
CONNECT 91 90 92 298  
CONNECT 92 91 93 299  
CONNECT 93 84 92 94  
CONNECT 94 93 95  
CONNECT 95 94 90 221  
CONNECT 96 97 101 105  
CONNECT 97 96 98 300  
CONNECT 98 97 99 301  
CONNECT 99 36 98 100  
CONNECT 100 99 101 302  
CONNECT 101 100 96  
CONNECT 102 103 107 303  
CONNECT 103 102 104 229  
CONNECT 104 103 105  
CONNECT 105 96 104 106  
CONNECT 106 105 107 304  
CONNECT 107 106 102 305  
CONNECT 108 109 113 114  
CONNECT 109 108 110 138  
CONNECT 110 109 111 147  
CONNECT 111 110 112 142  
CONNECT 112 111 113 115

CONNECT 113 112 108 306

CONNECT 114 108 125 307 308

CONNECT 115 112 119 309 310

CONNECT 116 117 121 141

CONNECT 117 116 118 165

CONNECT 118 117 119 143

CONNECT 119 118 115 120

CONNECT 120 119 121 311

CONNECT 121 116 120 128

CONNECT 122 123 127 137

CONNECT 123 122 124 153

CONNECT 124 123 125 139

CONNECT 125 124 114 126

CONNECT 126 125 127 312

CONNECT 127 122 126 129

CONNECT 128 121 133 313 314

CONNECT 129 127 135 316 317

CONNECT 130 131 135 136

CONNECT 131 130 132 159

CONNECT 132 131 133 140

CONNECT 133 132 128 134

CONNECT 134 133 135 315

CONNECT 135 130 129 134

CONNECT 136 130 358

CONNECT 137 122 358

CONNECT 138 109 364

CONNECT 139 124 364

CONNECT 140 132 376  
CONNECT 141 116 376  
CONNECT 142 111 370  
CONNECT 143 118 370  
CONNECT 144 145 149 208  
CONNECT 145 144 146 318  
CONNECT 146 145 147 319  
CONNECT 147 110 146 148  
CONNECT 148 147 149 320  
CONNECT 149 144 148 321  
CONNECT 150 151 155 196  
CONNECT 151 150 152 322  
CONNECT 152 151 153 323  
CONNECT 153 152 123 154  
CONNECT 154 153 155 324  
CONNECT 155 150 154 325  
CONNECT 156 157 161 184  
CONNECT 157 156 158 326  
CONNECT 158 157 159 327  
CONNECT 159 158 131 160  
CONNECT 160 159 161 328  
CONNECT 161 156 160 329  
CONNECT 162 163 167 171  
CONNECT 163 162 164 330  
CONNECT 164 163 165 331  
CONNECT 165 164 117 166  
CONNECT 166 165 167 332

CONNECT 167 162 166 333  
CONNECT 168 169 173 179  
CONNECT 169 168 170  
CONNECT 170 169 171 334  
CONNECT 171 170 162 172  
CONNECT 172 171 173 335  
CONNECT 173 168 172 336  
CONNECT 174 175 180 337  
CONNECT 175 174 176 217  
CONNECT 176 175 179  
CONNECT 177 178 179 180  
CONNECT 178 177  
CONNECT 179 168 177 176  
CONNECT 180 177 174 338  
CONNECT 181 182 186 190  
CONNECT 182 181 183 339  
CONNECT 183 182 184 340  
CONNECT 184 183 156 185  
CONNECT 185 184 186 341  
CONNECT 186 181 185  
CONNECT 187 188 192 342  
CONNECT 188 187 189 239  
CONNECT 189 188 190  
CONNECT 190 181 189 191  
CONNECT 191 190 192 343  
CONNECT 192 187 191 344  
CONNECT 193 194 198 202

CONNECT 194 193 195 345

CONNECT 195 194 196 346

CONNECT 196 195 150 197

CONNECT 197 196 198 347

CONNECT 198 193 197

CONNECT 199 200 204 348

CONNECT 200 199 201 349

CONNECT 201 200 202 350

CONNECT 202 193 201 203

CONNECT 203 202 204

CONNECT 204 203 199 232

CONNECT 205 206 210 214

CONNECT 206 205 207 351

CONNECT 207 206 208 352

CONNECT 208 144 207 209

CONNECT 209 208 210 353

CONNECT 210 205 209

CONNECT 211 212 216 354

CONNECT 212 211 213 355

CONNECT 213 212 214 356

CONNECT 214 205 213 215

CONNECT 215 214 216

CONNECT 216 215 211 224

CONNECT 217 175 218 219 220

CONNECT 218 217

CONNECT 219 217

CONNECT 220 217 388 389 391

CONNECT 221 95 222 223 394

CONNECT 222 221

CONNECT 223 221

CONNECT 224 216 225 226 227

CONNECT 225 224

CONNECT 226 224

CONNECT 227 224 379 380 381

CONNECT 228 17 16 31

CONNECT 229 103 230 231 385

CONNECT 230 229

CONNECT 231 229

CONNECT 232 204 233 234 403

CONNECT 233 232

CONNECT 234 232

CONNECT 235 67 236 237 238

CONNECT 236 235 397 398 399

CONNECT 237 235

CONNECT 238 235

CONNECT 239 188 240 241 242

CONNECT 240 239

CONNECT 241 239

CONNECT 242 239 243 244 245

CONNECT 243 242

CONNECT 244 242

CONNECT 245 242 246 406

CONNECT 246 245

CONNECT 247 79 248 249 408



CONNECT 248 247  
CONNECT 249 247  
CONNECT 254 6  
CONNECT 255 7  
CONNECT 256 7  
CONNECT 257 8  
CONNECT 258 8  
CONNECT 259 13  
CONNECT 260 18  
CONNECT 261 20  
CONNECT 262 20  
CONNECT 263 26  
CONNECT 264 21  
CONNECT 265 21  
CONNECT 266 37  
CONNECT 267 38  
CONNECT 268 40  
CONNECT 269 41  
CONNECT 270 43  
CONNECT 271 44  
CONNECT 272 46  
CONNECT 273 47  
CONNECT 274 49  
CONNECT 275 50  
CONNECT 276 52  
CONNECT 277 53  
CONNECT 278 55

CONNECT 279 56  
CONNECT 280 58  
CONNECT 281 59  
CONNECT 282 62  
CONNECT 283 64  
CONNECT 284 65  
CONNECT 285 66  
CONNECT 286 70  
CONNECT 287 71  
CONNECT 288 74  
CONNECT 289 76  
CONNECT 290 77  
CONNECT 291 78  
CONNECT 292 82  
CONNECT 293 83  
CONNECT 294 86  
CONNECT 295 88  
CONNECT 296 89  
CONNECT 297 90  
CONNECT 298 91  
CONNECT 299 92  
CONNECT 300 97  
CONNECT 301 98  
CONNECT 302 100  
CONNECT 303 102  
CONNECT 304 106  
CONNECT 305 107

CONNECT 306 113  
CONNECT 307 114  
CONNECT 308 114  
CONNECT 309 115  
CONNECT 310 115  
CONNECT 311 120  
CONNECT 312 126  
CONNECT 313 128  
CONNECT 314 128  
CONNECT 315 134  
CONNECT 316 129  
CONNECT 317 129  
CONNECT 318 145  
CONNECT 319 146  
CONNECT 320 148  
CONNECT 321 149  
CONNECT 322 151  
CONNECT 323 152  
CONNECT 324 154  
CONNECT 325 155  
CONNECT 326 157  
CONNECT 327 158  
CONNECT 328 160  
CONNECT 329 161  
CONNECT 330 163  
CONNECT 331 164  
CONNECT 332 166

CONNECT 333 167

CONNECT 334 170

CONNECT 335 172

CONNECT 336 173

CONNECT 337 174

CONNECT 338 180

CONNECT 339 182

CONNECT 340 183

CONNECT 341 185

CONNECT 342 187

CONNECT 343 191

CONNECT 344 192

CONNECT 345 194

CONNECT 346 195

CONNECT 347 197

CONNECT 348 199

CONNECT 349 200

CONNECT 350 201

CONNECT 351 206

CONNECT 352 207

CONNECT 353 209

CONNECT 354 211

CONNECT 355 212

CONNECT 356 213

CONNECT 357 28 29 359 360

CONNECT 358 136 137 361 362

CONNECT 359 357

CONNECT 360 357  
CONNECT 361 358  
CONNECT 362 358  
CONNECT 363 31 30 365 366  
CONNECT 364 138 139 367 368  
CONNECT 365 363  
CONNECT 366 363  
CONNECT 367 364  
CONNECT 368 364  
CONNECT 369 34 35 371 372  
CONNECT 370 142 143 373 374  
CONNECT 371 369  
CONNECT 372 369  
CONNECT 373 370  
CONNECT 374 370  
CONNECT 375 32 33 377 378  
CONNECT 376 140 141 444 445  
CONNECT 377 375  
CONNECT 378 375  
CONNECT 379 227  
CONNECT 380 227  
CONNECT 381 227 382 383  
CONNECT 382 381  
CONNECT 383 381 384 385  
CONNECT 384 383  
CONNECT 385 229 383 386 387  
CONNECT 386 385

CONNECT 387 385  
CONNECT 388 220  
CONNECT 389 220 390 392  
CONNECT 390 389  
CONNECT 391 220  
CONNECT 392 389 393 394  
CONNECT 393 392  
CONNECT 394 392 221 395 396  
CONNECT 395 394  
CONNECT 396 394  
CONNECT 397 236  
CONNECT 398 236  
CONNECT 399 236 400 401  
CONNECT 400 399  
CONNECT 401 399 402 403  
CONNECT 402 401  
CONNECT 403 401 232 404 405  
CONNECT 404 403  
CONNECT 405 403  
CONNECT 406 245 407 408  
CONNECT 407 406  
CONNECT 408 247 406 409 410  
CONNECT 409 408  
CONNECT 410 408  
CONNECT 411 412 413 423  
CONNECT 412 411  
CONNECT 413 411 414

CONNECT 414 413

CONNECT 415 416 418 419

CONNECT 416 415 417

CONNECT 417 416

CONNECT 418 415

CONNECT 419 415 420 421 422

CONNECT 420 419

CONNECT 421 419

CONNECT 422 419

CONNECT 423 411 424 425

CONNECT 424 423 426 427

CONNECT 425 423

CONNECT 426 424

CONNECT 427 424 428 429

CONNECT 428 427 431 435

CONNECT 429 427 430 433

CONNECT 430 429 432 434

CONNECT 431 428 432 436

CONNECT 432 431 430 437

CONNECT 433 429

CONNECT 434 430

CONNECT 435 428

CONNECT 436 431

CONNECT 437 432 438

CONNECT 438 437 439 440

CONNECT 439 438

CONNECT 440 438 441 442 443

CONNECT 441 440

CONNECT 442 440

CONNECT 443 440

CONNECT 444 376

CONNECT 445 376

**Table S4.** PDB file of **G1a•G2a•M1**

REMARK 1 File created by GaussView 6.1.1

|        |    |   |   |         |        |        |   |
|--------|----|---|---|---------|--------|--------|---|
| HETATM | 1  | C | 0 | -9.999  | 2.415  | -3.129 | C |
| HETATM | 2  | C | 0 | -8.745  | 3.041  | -3.188 | C |
| HETATM | 3  | C | 0 | -7.788  | 2.693  | -4.166 | C |
| HETATM | 4  | C | 0 | -8.104  | 1.630  | -5.036 | C |
| HETATM | 5  | C | 0 | -9.339  | 0.970  | -4.988 | C |
| HETATM | 6  | C | 0 | -10.271 | 1.392  | -4.039 | C |
| HETATM | 7  | C | 0 | -11.015 | 2.806  | -2.069 | C |
| HETATM | 8  | C | 0 | -9.609  | -0.223 | -5.886 | C |
| HETATM | 9  | C | 0 | -8.018  | -3.716 | -3.898 | C |
| HETATM | 10 | C | 0 | -7.158  | -2.940 | -4.706 | C |
| HETATM | 11 | C | 0 | -7.710  | -1.826 | -5.370 | C |
| HETATM | 12 | C | 0 | -9.065  | -1.489 | -5.252 | C |
| HETATM | 13 | C | 0 | -9.877  | -2.301 | -4.460 | C |
| HETATM | 14 | C | 0 | -9.384  | -3.414 | -3.778 | C |
| HETATM | 15 | C | 0 | -10.112 | 0.598  | 1.538  | C |
| HETATM | 16 | C | 0 | -9.460  | 1.828  | 1.303  | C |
| HETATM | 17 | C | 0 | -10.756 | 2.067  | -0.771 | C |
| HETATM | 18 | C | 0 | -11.397 | 0.863  | -0.476 | C |
| HETATM | 19 | C | 0 | -11.099 | 0.115  | 0.664  | C |
| HETATM | 20 | C | 0 | -10.293 | -4.243 | -2.890 | C |



|        |    |   |   |         |        |        |   |
|--------|----|---|---|---------|--------|--------|---|
| HETATM | 21 | C | 0 | -11.781 | -1.218 | 0.913  | C |
| HETATM | 22 | C | 0 | -9.904  | -2.888 | 1.190  | C |
| HETATM | 23 | C | 0 | -9.028  | -3.878 | 0.715  | C |
| HETATM | 24 | C | 0 | -9.180  | -4.300 | -0.620 | C |
| HETATM | 25 | C | 0 | -10.197 | -3.797 | -1.442 | C |
| HETATM | 26 | C | 0 | -11.061 | -2.837 | -0.912 | C |
| HETATM | 27 | C | 0 | -10.925 | -2.357 | 0.392  | C |
| HETATM | 28 | O | 0 | -9.772  | -2.448 | 2.499  | O |
| HETATM | 29 | O | 0 | -9.849  | -0.072 | 2.721  | O |
| HETATM | 30 | O | 0 | -8.473  | 4.103  | -2.340 | O |
| HETATM | 31 | O | 0 | -9.204  | 3.771  | -0.096 | O |
| HETATM | 32 | O | 0 | -8.342  | -5.287 | -1.108 | O |
| HETATM | 33 | O | 0 | -7.520  | -4.865 | -3.309 | O |
| HETATM | 34 | O | 0 | -7.182  | 1.265  | -6.005 | O |
| HETATM | 35 | O | 0 | -6.897  | -1.085 | -6.215 | O |
| HETATM | 36 | C | 0 | -4.216  | 5.074  | -4.718 | C |
| HETATM | 37 | C | 0 | -5.141  | 4.882  | -5.758 | C |
| HETATM | 38 | C | 0 | -6.274  | 4.097  | -5.573 | C |
| HETATM | 39 | C | 0 | -6.529  | 3.472  | -4.343 | C |
| HETATM | 40 | C | 0 | -5.590  | 3.636  | -3.314 | C |
| HETATM | 41 | C | 0 | -4.457  | 4.426  | -3.496 | C |
| HETATM | 42 | C | 0 | -6.593  | 3.475  | 4.108  | C |
| HETATM | 43 | C | 0 | -7.797  | 4.139  | 3.815  | C |
| HETATM | 44 | C | 0 | -8.711  | 3.608  | 2.910  | C |
| HETATM | 45 | C | 0 | -8.466  | 2.386  | 2.266  | C |
| HETATM | 46 | C | 0 | -7.263  | 1.725  | 2.552  | C |
| HETATM | 47 | C | 0 | -6.344  | 2.257  | 3.453  | C |

|        |    |   |   |        |        |        |   |
|--------|----|---|---|--------|--------|--------|---|
| HETATM | 48 | C | 0 | -6.014 | -5.782 | 3.169  | C |
| HETATM | 49 | C | 0 | -7.377 | -6.084 | 3.324  | C |
| HETATM | 50 | C | 0 | -8.345 | -5.446 | 2.553  | C |
| HETATM | 51 | C | 0 | -7.985 | -4.489 | 1.595  | C |
| HETATM | 52 | C | 0 | -6.630 | -4.157 | 1.461  | C |
| HETATM | 53 | C | 0 | -5.663 | -4.792 | 2.236  | C |
| HETATM | 54 | C | 0 | -2.996 | -4.053 | -5.185 | C |
| HETATM | 55 | C | 0 | -3.856 | -3.959 | -6.293 | C |
| HETATM | 56 | C | 0 | -5.190 | -3.588 | -6.140 | C |
| HETATM | 57 | C | 0 | -5.718 | -3.297 | -4.873 | C |
| HETATM | 58 | C | 0 | -4.853 | -3.360 | -3.770 | C |
| HETATM | 59 | C | 0 | -3.520 | -3.732 | -3.923 | C |
| HETATM | 60 | C | 0 | 1.008  | -5.440 | -5.491 | C |
| HETATM | 61 | C | 0 | 0.533  | -4.568 | -6.484 | C |
| HETATM | 62 | C | 0 | -0.773 | -4.100 | -6.400 | C |
| HETATM | 63 | C | 0 | -1.592 | -4.496 | -5.332 | C |
| HETATM | 64 | C | 0 | -1.012 | -5.368 | -4.393 | C |
| HETATM | 65 | N | 0 | 0.235  | -5.828 | -4.460 | N |
| HETATM | 66 | C | 0 | 4.918  | -7.011 | -5.752 | C |
| HETATM | 67 | C | 0 | 4.410  | -6.077 | -6.668 | C |
| HETATM | 68 | N | 0 | 3.170  | -5.580 | -6.554 | N |
| HETATM | 69 | C | 0 | 2.387  | -5.997 | -5.543 | C |
| HETATM | 70 | C | 0 | 2.824  | -6.919 | -4.583 | C |
| HETATM | 71 | C | 0 | 4.114  | -7.430 | -4.693 | C |
| HETATM | 72 | C | 0 | -3.109 | -7.914 | 5.421  | C |
| HETATM | 73 | C | 0 | -2.800 | -7.551 | 4.102  | C |
| HETATM | 74 | C | 0 | -3.739 | -6.848 | 3.361  | C |

|        |     |   |   |        |         |        |   |
|--------|-----|---|---|--------|---------|--------|---|
| HETATM | 75  | C | 0 | -4.974 | -6.505  | 3.935  | C |
| HETATM | 76  | C | 0 | -5.170 | -6.903  | 5.270  | C |
| HETATM | 77  | N | 0 | -4.281 | -7.584  | 5.993  | N |
| HETATM | 78  | C | 0 | -0.291 | -10.131 | 7.652  | C |
| HETATM | 79  | C | 0 | -0.072 | -9.731  | 6.325  | C |
| HETATM | 80  | N | 0 | -0.984 | -9.027  | 5.642  | N |
| HETATM | 81  | C | 0 | -2.142 | -8.692  | 6.240  | C |
| HETATM | 82  | C | 0 | -2.437 | -9.052  | 7.562  | C |
| HETATM | 83  | C | 0 | -1.489 | -9.784  | 8.272  | C |
| HETATM | 84  | C | 0 | -3.851 | 5.202   | 6.855  | C |
| HETATM | 85  | C | 0 | -3.975 | 3.804   | 6.828  | C |
| HETATM | 86  | C | 0 | -4.867 | 3.226   | 5.935  | C |
| HETATM | 87  | C | 0 | -5.623 | 4.037   | 5.073  | C |
| HETATM | 88  | C | 0 | -5.405 | 5.422   | 5.174  | C |
| HETATM | 89  | N | 0 | -4.559 | 5.994   | 6.029  | N |
| HETATM | 90  | C | 0 | -1.227 | 6.990   | 9.638  | C |
| HETATM | 91  | C | 0 | -1.943 | 7.826   | 8.784  | C |
| HETATM | 92  | C | 0 | -2.813 | 7.264   | 7.854  | C |
| HETATM | 93  | C | 0 | -2.930 | 5.869   | 7.815  | C |
| HETATM | 94  | N | 0 | -2.233 | 5.061   | 8.633  | N |
| HETATM | 95  | C | 0 | -1.399 | 5.601   | 9.532  | C |
| HETATM | 96  | C | 0 | -0.868 | 7.598   | -5.397 | C |
| HETATM | 97  | N | 0 | -1.239 | 6.710   | -6.338 | N |
| HETATM | 98  | C | 0 | -2.285 | 5.924   | -6.093 | C |
| HETATM | 99  | C | 0 | -3.039 | 5.950   | -4.906 | C |
| HETATM | 100 | C | 0 | -2.628 | 6.870   | -3.930 | C |
| HETATM | 101 | C | 0 | -1.544 | 7.705   | -4.172 | C |

|        |     |   |   |        |        |        |   |
|--------|-----|---|---|--------|--------|--------|---|
| HETATM | 102 | C | 0 | 2.363  | 10.168 | -6.283 | C |
| HETATM | 103 | C | 0 | 1.684  | 10.200 | -5.053 | C |
| HETATM | 104 | N | 0 | 0.673  | 9.361  | -4.784 | N |
| HETATM | 105 | C | 0 | 0.285  | 8.480  | -5.727 | C |
| HETATM | 106 | C | 0 | 0.912  | 8.388  | -6.976 | C |
| HETATM | 107 | C | 0 | 1.973  | 9.247  | -7.249 | C |
| HETATM | 108 | C | 0 | 9.732  | 4.429  | 0.537  | C |
| HETATM | 109 | C | 0 | 8.423  | 4.880  | 0.307  | C |
| HETATM | 110 | C | 0 | 7.531  | 5.134  | 1.370  | C |
| HETATM | 111 | C | 0 | 7.973  | 4.839  | 2.675  | C |
| HETATM | 112 | C | 0 | 9.263  | 4.361  | 2.934  | C |
| HETATM | 113 | C | 0 | 10.127 | 4.183  | 1.853  | C |
| HETATM | 114 | C | 0 | 10.674 | 4.160  | -0.622 | C |
| HETATM | 115 | C | 0 | 9.661  | 3.974  | 4.345  | C |
| HETATM | 116 | C | 0 | 8.451  | -0.092 | 5.151  | C |
| HETATM | 117 | C | 0 | 7.516  | 0.942  | 5.357  | C |
| HETATM | 118 | C | 0 | 7.924  | 2.263  | 5.073  | C |
| HETATM | 119 | C | 0 | 9.234  | 2.550  | 4.655  | C |
| HETATM | 120 | C | 0 | 10.123 | 1.488  | 4.484  | C |
| HETATM | 121 | C | 0 | 9.755  | 0.162  | 4.710  | C |
| HETATM | 122 | C | 0 | 9.895  | 0.158  | -2.047 | C |
| HETATM | 123 | C | 0 | 9.135  | 1.229  | -2.562 | C |
| HETATM | 124 | C | 0 | 9.429  | 2.526  | -2.103 | C |
| HETATM | 125 | C | 0 | 10.453 | 2.766  | -1.176 | C |
| HETATM | 126 | C | 0 | 11.194 | 1.676  | -0.717 | C |
| HETATM | 127 | C | 0 | 10.938 | 0.368  | -1.132 | C |
| HETATM | 128 | C | 0 | 10.697 | -0.986 | 4.403  | C |

|              |   |        |        |        |   |
|--------------|---|--------|--------|--------|---|
| HETATM 129 C | 0 | 11.719 | -0.801 | -0.560 | C |
| HETATM 130 C | 0 | 9.966  | -2.367 | 0.378  | C |
| HETATM 131 C | 0 | 9.187  | -2.894 | 1.426  | C |
| HETATM 132 C | 0 | 9.437  | -2.428 | 2.732  | C |
| HETATM 133 C | 0 | 10.461 | -1.505 | 2.996  | C |
| HETATM 134 C | 0 | 11.212 | -1.024 | 1.922  | C |
| HETATM 135 C | 0 | 10.976 | -1.425 | 0.606  | C |
| HETATM 136 O | 0 | 9.750  | -2.831 | -0.909 | O |
| HETATM 137 O | 0 | 9.663  | -1.111 | -2.547 | O |
| HETATM 138 O | 0 | 8.027  | 5.186  | -0.986 | O |
| HETATM 139 O | 0 | 8.720  | 3.596  | -2.626 | O |
| HETATM 140 O | 0 | 8.718  | -2.980 | 3.779  | O |
| HETATM 141 O | 0 | 8.084  | -1.397 | 5.444  | O |
| HETATM 142 O | 0 | 7.120  | 5.070  | 3.743  | O |
| HETATM 143 O | 0 | 7.041  | 3.297  | 5.332  | O |
| HETATM 144 C | 0 | 3.752  | 7.119  | 0.659  | C |
| HETATM 145 C | 0 | 4.712  | 7.657  | 1.531  | C |
| HETATM 146 C | 0 | 5.915  | 6.999  | 1.766  | C |
| HETATM 147 C | 0 | 6.203  | 5.774  | 1.144  | C |
| HETATM 148 C | 0 | 5.229  | 5.218  | 0.304  | C |
| HETATM 149 C | 0 | 4.028  | 5.880  | 0.059  | C |
| HETATM 150 C | 0 | 6.177  | 0.290  | -5.578 | C |
| HETATM 151 C | 0 | 7.361  | 0.971  | -5.909 | C |
| HETATM 152 C | 0 | 8.293  | 1.310  | -4.931 | C |
| HETATM 153 C | 0 | 8.078  | 0.975  | -3.587 | C |
| HETATM 154 C | 0 | 6.875  | 0.341  | -3.246 | C |
| HETATM 155 C | 0 | 5.941  | 0.006  | -4.223 | C |

|        |     |   |   |        |        |        |   |
|--------|-----|---|---|--------|--------|--------|---|
| HETATM | 156 | C | 0 | 6.220  | -5.926 | 0.564  | C |
| HETATM | 157 | C | 0 | 7.595  | -6.195 | 0.448  | C |
| HETATM | 158 | C | 0 | 8.543  | -5.217 | 0.730  | C |
| HETATM | 159 | C | 0 | 8.155  | -3.935 | 1.144  | C |
| HETATM | 160 | C | 0 | 6.785  | -3.662 | 1.256  | C |
| HETATM | 161 | C | 0 | 5.834  | -4.640 | 0.973  | C |
| HETATM | 162 | C | 0 | 3.628  | 0.128  | 7.080  | C |
| HETATM | 163 | C | 0 | 4.815  | -0.196 | 7.759  | C |
| HETATM | 164 | C | 0 | 6.059  | 0.056  | 7.190  | C |
| HETATM | 165 | C | 0 | 6.167  | 0.645  | 5.922  | C |
| HETATM | 166 | C | 0 | 4.985  | 0.949  | 5.231  | C |
| HETATM | 167 | C | 0 | 3.739  | 0.698  | 5.802  | C |
| HETATM | 168 | C | 0 | -0.094 | -0.645 | 8.976  | C |
| HETATM | 169 | C | 0 | 0.043  | 0.540  | 8.238  | C |
| HETATM | 170 | C | 0 | 1.249  | 0.801  | 7.601  | C |
| HETATM | 171 | C | 0 | 2.308  | -0.114 | 7.705  | C |
| HETATM | 172 | C | 0 | 2.054  | -1.277 | 8.453  | C |
| HETATM | 173 | N | 0 | 0.904  | -1.543 | 9.068  | N |
| HETATM | 174 | C | 0 | -3.700 | -1.423 | 11.032 | C |
| HETATM | 175 | C | 0 | -3.459 | -0.228 | 10.339 | C |
| HETATM | 176 | N | 0 | -2.310 | -0.010 | 9.684  | N |
| HETATM | 177 | C | 0 | -1.516 | -2.176 | 10.374 | C |
| HETATM | 178 | H | 0 | -0.714 | -2.904 | 10.355 | H |
| HETATM | 179 | C | 0 | -1.355 | -0.957 | 9.703  | C |
| HETATM | 180 | C | 0 | -2.714 | -2.406 | 11.044 | C |
| HETATM | 181 | C | 0 | 3.385  | -8.934 | -0.422 | C |
| HETATM | 182 | N | 0 | 4.497  | -8.792 | -1.168 | N |

|        |     |   |   |       |         |         |   |
|--------|-----|---|---|-------|---------|---------|---|
| HETATM | 183 | C | 0 | 5.368 | -7.840  | -0.832  | C |
| HETATM | 184 | C | 0 | 5.209 | -6.961  | 0.254   | C |
| HETATM | 185 | C | 0 | 4.037 | -7.114  | 1.010   | C |
| HETATM | 186 | C | 0 | 3.121 | -8.102  | 0.676   | C |
| HETATM | 187 | C | 0 | 0.624 | -11.974 | -1.406  | C |
| HETATM | 188 | C | 0 | 0.423 | -11.069 | -0.353  | C |
| HETATM | 189 | N | 0 | 1.317 | -10.115 | -0.063  | N |
| HETATM | 190 | C | 0 | 2.438 | -10.017 | -0.800  | C |
| HETATM | 191 | C | 0 | 2.714 | -10.883 | -1.866  | C |
| HETATM | 192 | C | 0 | 1.786 | -11.876 | -2.167  | C |
| HETATM | 193 | C | 0 | 3.595 | -1.001  | -8.697  | C |
| HETATM | 194 | N | 0 | 4.194 | 0.202   | -8.785  | N |
| HETATM | 195 | C | 0 | 4.978 | 0.595   | -7.783  | C |
| HETATM | 196 | C | 0 | 5.236 | -0.164  | -6.627  | C |
| HETATM | 197 | C | 0 | 4.579 | -1.402  | -6.542  | C |
| HETATM | 198 | C | 0 | 3.753 | -1.826  | -7.574  | C |
| HETATM | 199 | C | 0 | 1.313 | -2.368  | -11.980 | C |
| HETATM | 200 | C | 0 | 1.893 | -1.104  | -12.065 | C |
| HETATM | 201 | C | 0 | 2.642 | -0.625  | -10.994 | C |
| HETATM | 202 | C | 0 | 2.777 | -1.439  | -9.861  | C |
| HETATM | 203 | N | 0 | 2.204 | -2.652  | -9.773  | N |
| HETATM | 204 | C | 0 | 1.493 | -3.119  | -10.809 | C |
| HETATM | 205 | C | 0 | 0.189 | 9.315   | -0.065  | C |
| HETATM | 206 | N | 0 | 0.647 | 9.179   | 1.193   | N |
| HETATM | 207 | C | 0 | 1.761 | 8.477   | 1.391   | C |
| HETATM | 208 | C | 0 | 2.499 | 7.852   | 0.370   | C |
| HETATM | 209 | C | 0 | 1.999 | 7.991   | -0.932  | C |

|              |   |        |        |         |   |
|--------------|---|--------|--------|---------|---|
| HETATM 210 C | 0 | 0.844  | 8.730  | -1.159  | C |
| HETATM 211 C | 0 | -3.263 | 11.678 | -0.650  | C |
| HETATM 212 C | 0 | -2.780 | 11.528 | 0.647   | C |
| HETATM 213 C | 0 | -1.646 | 10.751 | 0.861   | C |
| HETATM 214 C | 0 | -1.040 | 10.138 | -0.244  | C |
| HETATM 215 N | 0 | -1.517 | 10.269 | -1.498  | N |
| HETATM 216 C | 0 | -2.599 | 11.032 | -1.706  | C |
| HETATM 217 C | 0 | -4.471 | 0.895  | 10.328  | C |
| HETATM 218 H | 0 | -4.289 | 1.511  | 9.442   | H |
| HETATM 219 H | 0 | -5.485 | 0.481  | 10.249  | H |
| HETATM 220 C | 0 | -4.413 | 1.805  | 11.587  | C |
| HETATM 221 C | 0 | -0.674 | 4.642  | 10.449  | C |
| HETATM 222 H | 0 | -0.528 | 3.698  | 9.915   | H |
| HETATM 223 H | 0 | 0.315  | 5.048  | 10.696  | H |
| HETATM 224 C | 0 | -3.081 | 11.221 | -3.127  | C |
| HETATM 225 H | 0 | -2.790 | 10.357 | -3.732  | H |
| HETATM 226 H | 0 | -4.177 | 11.269 | -3.123  | H |
| HETATM 227 C | 0 | -2.541 | 12.529 | -3.784  | C |
| HETATM 228 C | 0 | -9.798 | 2.541  | 0.134   | C |
| HETATM 229 C | 0 | 2.064  | 11.225 | -4.007  | C |
| HETATM 230 H | 0 | 1.811  | 10.845 | -3.013  | H |
| HETATM 231 H | 0 | 3.150  | 11.372 | -4.040  | H |
| HETATM 232 C | 0 | 0.919  | -4.510 | -10.663 | C |
| HETATM 233 H | 0 | 0.761  | -4.705 | -9.599  | H |
| HETATM 234 H | 0 | -0.057 | -4.563 | -11.163 | H |
| HETATM 235 C | 0 | 5.234  | -5.594 | -7.840  | C |
| HETATM 236 C | 0 | 5.053  | -6.422 | -9.143  | C |



|              |   |         |         |        |   |
|--------------|---|---------|---------|--------|---|
| HETATM 237 H | 0 | 4.963   | -4.555  | -8.051 | H |
| HETATM 238 H | 0 | 6.298   | -5.615  | -7.571 | H |
| HETATM 239 C | 0 | -0.813  | -11.139 | 0.518  | C |
| HETATM 240 H | 0 | -0.960  | -10.159 | 0.983  | H |
| HETATM 241 H | 0 | -1.688  | -11.349 | -0.111 | H |
| HETATM 242 C | 0 | -0.745  | -12.222 | 1.628  | C |
| HETATM 243 H | 0 | -1.721  | -12.260 | 2.128  | H |
| HETATM 244 H | 0 | -0.599  | -13.202 | 1.147  | H |
| HETATM 245 C | 0 | 0.334   | -11.994 | 2.651  | C |
| HETATM 246 H | 0 | 1.362   | -12.034 | 2.289  | H |
| HETATM 247 C | 0 | 1.197   | -10.097 | 5.588  | C |
| HETATM 248 H | 0 | 1.349   | -9.367  | 4.787  | H |
| HETATM 249 H | 0 | 2.051   | -10.026 | 6.274  | H |
| HETATM 250 H | 0 | -11.239 | 0.897   | -3.997 | H |
| HETATM 251 H | 0 | -12.020 | 2.564   | -2.430 | H |
| HETATM 252 H | 0 | -10.965 | 3.885   | -1.895 | H |
| HETATM 253 H | 0 | -10.688 | -0.327  | -6.038 | H |
| HETATM 254 H | 0 | -9.139  | -0.063  | -6.861 | H |
| HETATM 255 H | 0 | -10.933 | -2.056  | -4.368 | H |
| HETATM 256 H | 0 | -12.153 | 0.490   | -1.164 | H |
| HETATM 257 H | 0 | -11.327 | -4.135  | -3.235 | H |
| HETATM 258 H | 0 | -10.017 | -5.299  | -2.965 | H |
| HETATM 259 H | 0 | -11.852 | -2.434  | -1.542 | H |
| HETATM 260 H | 0 | -11.956 | -1.349  | 1.985  | H |
| HETATM 261 H | 0 | -12.751 | -1.226  | 0.405  | H |
| HETATM 262 H | 0 | -4.989  | 5.384   | -6.709 | H |
| HETATM 263 H | 0 | -6.984  | 3.982   | -6.386 | H |

|        |     |   |   |        |         |        |   |
|--------|-----|---|---|--------|---------|--------|---|
| HETATM | 264 | H | 0 | -5.729 | 3.121   | -2.369 | H |
| HETATM | 265 | H | 0 | -3.738 | 4.524   | -2.687 | H |
| HETATM | 266 | H | 0 | -8.034 | 5.068   | 4.324  | H |
| HETATM | 267 | H | 0 | -9.635 | 4.140   | 2.707  | H |
| HETATM | 268 | H | 0 | -7.028 | 0.792   | 2.048  | H |
| HETATM | 269 | H | 0 | -5.412 | 1.729   | 3.636  | H |
| HETATM | 270 | H | 0 | -7.680 | -6.857  | 4.024  | H |
| HETATM | 271 | H | 0 | -9.391 | -5.714  | 2.673  | H |
| HETATM | 272 | H | 0 | -6.326 | -3.395  | 0.749  | H |
| HETATM | 273 | H | 0 | -4.621 | -4.507  | 2.123  | H |
| HETATM | 274 | H | 0 | -3.485 | -4.215  | -7.281 | H |
| HETATM | 275 | H | 0 | -5.836 | -3.541  | -7.010 | H |
| HETATM | 276 | H | 0 | -5.214 | -3.094  | -2.782 | H |
| HETATM | 277 | H | 0 | -2.873 | -3.760  | -3.050 | H |
| HETATM | 278 | H | 0 | -1.152 | -3.411  | -7.150 | H |
| HETATM | 279 | H | 0 | -1.607 | -5.731  | -3.556 | H |
| HETATM | 280 | H | 0 | 5.930  | -7.390  | -5.867 | H |
| HETATM | 281 | H | 0 | 2.157  | -7.213  | -3.782 | H |
| HETATM | 282 | H | 0 | 4.481  | -8.138  | -3.955 | H |
| HETATM | 283 | H | 0 | -3.531 | -6.587  | 2.327  | H |
| HETATM | 284 | H | 0 | -6.094 | -6.639  | 5.781  | H |
| HETATM | 285 | H | 0 | 0.469  | -10.698 | 8.183  | H |
| HETATM | 286 | H | 0 | -3.383 | -8.754  | 7.996  | H |
| HETATM | 287 | H | 0 | -1.681 | -10.077 | 9.301  | H |
| HETATM | 288 | H | 0 | -4.999 | 2.147   | 5.923  | H |
| HETATM | 289 | H | 0 | -5.936 | 6.102   | 4.509  | H |
| HETATM | 290 | H | 0 | -0.539 | 7.399   | 10.372 | H |

|              |   |        |        |        |   |
|--------------|---|--------|--------|--------|---|
| HETATM 291 H | 0 | -1.822 | 8.905  | 8.840  | H |
| HETATM 292 H | 0 | -3.394 | 7.867  | 7.166  | H |
| HETATM 293 H | 0 | -2.541 | 5.213  | -6.877 | H |
| HETATM 294 H | 0 | -3.180 | 6.956  | -2.998 | H |
| HETATM 295 H | 0 | 3.185  | 10.855 | -6.466 | H |
| HETATM 296 H | 0 | 0.561  | 7.655  | -7.693 | H |
| HETATM 297 H | 0 | 2.488  | 9.198  | -8.205 | H |
| HETATM 298 H | 0 | 11.138 | 3.826  | 2.040  | H |
| HETATM 299 H | 0 | 11.709 | 4.253  | -0.275 | H |
| HETATM 300 H | 0 | 10.510 | 4.901  | -1.410 | H |
| HETATM 301 H | 0 | 10.748 | 4.053  | 4.450  | H |
| HETATM 302 H | 0 | 9.198  | 4.661  | 5.058  | H |
| HETATM 303 H | 0 | 11.138 | 1.703  | 4.153  | H |
| HETATM 304 H | 0 | 11.995 | 1.852  | -0.002 | H |
| HETATM 305 H | 0 | 11.732 | -0.642 | 4.492  | H |
| HETATM 306 H | 0 | 10.542 | -1.793 | 5.125  | H |
| HETATM 307 H | 0 | 12.000 | -0.299 | 2.117  | H |
| HETATM 308 H | 0 | 11.876 | -1.553 | -1.339 | H |
| HETATM 309 H | 0 | 12.699 | -0.449 | -0.222 | H |
| HETATM 310 H | 0 | 4.530  | 8.621  | 1.998  | H |
| HETATM 311 H | 0 | 6.651  | 7.447  | 2.426  | H |
| HETATM 312 H | 0 | 5.396  | 4.242  | -0.142 | H |
| HETATM 313 H | 0 | 3.286  | 5.422  | -0.588 | H |
| HETATM 314 H | 0 | 7.579  | 1.193  | -6.949 | H |
| HETATM 315 H | 0 | 9.214  | 1.809  | -5.216 | H |
| HETATM 316 H | 0 | 6.664  | 0.104  | -2.207 | H |
| HETATM 317 H | 0 | 5.014  | -0.478 | -3.927 | H |

|              |   |        |         |         |   |
|--------------|---|--------|---------|---------|---|
| HETATM 318 H | 0 | 7.924  | -7.188  | 0.156   | H |
| HETATM 319 H | 0 | 9.599  | -5.448  | 0.635   | H |
| HETATM 320 H | 0 | 6.455  | -2.662  | 1.524   | H |
| HETATM 321 H | 0 | 4.779  | -4.391  | 1.036   | H |
| HETATM 322 H | 0 | 6.961  | -0.191  | 7.741   | H |
| HETATM 323 H | 0 | 5.036  | 1.361   | 4.228   | H |
| HETATM 324 H | 0 | 2.839  | 0.926   | 5.236   | H |
| HETATM 325 H | 0 | 1.384  | 1.726   | 7.047   | H |
| HETATM 326 H | 0 | 2.827  | -2.040  | 8.542   | H |
| HETATM 327 H | 0 | -4.646 | -1.574  | 11.547  | H |
| HETATM 328 H | 0 | -2.877 | -3.344  | 11.569  | H |
| HETATM 329 H | 0 | 6.241  | -7.746  | -1.475  | H |
| HETATM 330 H | 0 | 3.859  | -6.475  | 1.871   | H |
| HETATM 331 H | 0 | -0.122 | -12.734 | -1.622  | H |
| HETATM 332 H | 0 | 3.633  | -10.763 | -2.428  | H |
| HETATM 333 H | 0 | 1.965  | -12.562 | -2.991  | H |
| HETATM 334 H | 0 | 5.426  | 1.582   | -7.892  | H |
| HETATM 335 H | 0 | 4.744  | -2.047  | -5.683  | H |
| HETATM 336 H | 0 | 0.727  | -2.770  | -12.802 | H |
| HETATM 337 H | 0 | 1.764  | -0.498  | -12.959 | H |
| HETATM 338 H | 0 | 3.120  | 0.347   | -11.011 | H |
| HETATM 339 H | 0 | 2.089  | 8.384   | 2.426   | H |
| HETATM 340 H | 0 | 2.534  | 7.550   | -1.769  | H |
| HETATM 341 H | 0 | -4.143 | 12.282  | -0.851  | H |
| HETATM 342 H | 0 | -3.281 | 12.012  | 1.482   | H |
| HETATM 343 H | 0 | -1.222 | 10.604  | 1.846   | H |
| HETATM 344 C | 0 | -9.053 | -1.248  | 2.708   | C |

|              |   |        |        |        |   |
|--------------|---|--------|--------|--------|---|
| HETATM 345 C | 0 | 8.938  | -2.045 | -1.765 | C |
| HETATM 346 H | 0 | -8.253 | -1.160 | 1.964  | H |
| HETATM 347 H | 0 | -8.647 | -1.320 | 3.717  | H |
| HETATM 348 H | 0 | 8.158  | -1.541 | -1.185 | H |
| HETATM 349 H | 0 | 8.510  | -2.744 | -2.482 | H |
| HETATM 350 C | 0 | -8.112 | 3.831  | -0.997 | C |
| HETATM 351 C | 0 | 7.658  | 4.132  | -1.859 | C |
| HETATM 352 H | 0 | -7.526 | 2.908  | -0.935 | H |
| HETATM 353 H | 0 | -7.525 | 4.694  | -0.681 | H |
| HETATM 354 H | 0 | 7.162  | 3.330  | -1.300 | H |
| HETATM 355 H | 0 | 6.980  | 4.587  | -2.582 | H |
| HETATM 356 C | 0 | -6.359 | 0.139  | -5.752 | C |
| HETATM 357 C | 0 | 6.399  | 3.960  | 4.254  | C |
| HETATM 358 H | 0 | -6.124 | 0.075  | -4.683 | H |
| HETATM 359 H | 0 | -5.459 | 0.301  | -6.344 | H |
| HETATM 360 H | 0 | 6.169  | 3.260  | 3.444  | H |
| HETATM 361 H | 0 | 5.490  | 4.379  | 4.686  | H |
| HETATM 362 C | 0 | -7.250 | -4.878 | -1.916 | C |
| HETATM 363 C | 0 | 7.674  | -2.230 | 4.375  | C |
| HETATM 364 H | 0 | -6.890 | -3.899 | -1.588 | H |
| HETATM 365 H | 0 | -6.489 | -5.647 | -1.784 | H |
| HETATM 366 H | 0 | -3.226 | 12.806 | -4.595 | H |
| HETATM 367 H | 0 | -2.591 | 13.338 | -3.044 | H |
| HETATM 368 C | 0 | -1.143 | 12.423 | -4.342 | C |
| HETATM 369 H | 0 | -1.066 | 12.059 | -5.368 | H |
| HETATM 370 C | 0 | -0.022 | 12.717 | -3.679 | C |
| HETATM 371 H | 0 | -0.099 | 13.050 | -2.643 | H |

|              |   |        |         |         |   |
|--------------|---|--------|---------|---------|---|
| HETATM 372 C | 0 | 1.377  | 12.608  | -4.233  | C |
| HETATM 373 H | 0 | 1.376  | 12.825  | -5.309  | H |
| HETATM 374 H | 0 | 2.004  | 13.376  | -3.762  | H |
| HETATM 375 H | 0 | -4.692 | 1.204   | 12.465  | H |
| HETATM 376 C | 0 | -3.069 | 2.443   | 11.816  | C |
| HETATM 377 H | 0 | -2.275 | 1.784   | 12.170  | H |
| HETATM 378 H | 0 | -5.179 | 2.582   | 11.477  | H |
| HETATM 379 C | 0 | -2.785 | 3.729   | 11.588  | C |
| HETATM 380 H | 0 | -3.572 | 4.384   | 11.214  | H |
| HETATM 381 C | 0 | -1.427 | 4.349   | 11.777  | C |
| HETATM 382 H | 0 | -1.520 | 5.289   | 12.341  | H |
| HETATM 383 H | 0 | -0.797 | 3.681   | 12.377  | H |
| HETATM 384 H | 0 | 5.734  | -6.002  | -9.894  | H |
| HETATM 385 H | 0 | 5.387  | -7.453  | -8.955  | H |
| HETATM 386 C | 0 | 3.650  | -6.434  | -9.693  | C |
| HETATM 387 H | 0 | 2.943  | -7.114  | -9.215  | H |
| HETATM 388 C | 0 | 3.225  | -5.659  | -10.694 | C |
| HETATM 389 H | 0 | 3.930  | -4.962  | -11.151 | H |
| HETATM 390 C | 0 | 1.820  | -5.639  | -11.240 | C |
| HETATM 391 H | 0 | 1.325  | -6.595  | -11.027 | H |
| HETATM 392 H | 0 | 1.854  | -5.539  | -12.334 | H |
| HETATM 393 C | 0 | 0.111  | -11.745 | 3.945   | C |
| HETATM 394 H | 0 | -0.918 | -11.689 | 4.301   | H |
| HETATM 395 C | 0 | 1.185  | -11.524 | 4.976   | C |
| HETATM 396 H | 0 | 1.065  | -12.250 | 5.794   | H |
| HETATM 397 H | 0 | 2.169  | -11.713 | 4.530   | H |
| HETATM 398 C | 0 | 2.434  | 0.402   | 0.102   | C |

|              |   |        |        |        |   |
|--------------|---|--------|--------|--------|---|
| HETATM 399 O | 0 | 3.330  | -0.323 | -0.349 | O |
| HETATM 400 O | 0 | 2.655  | 1.389  | 0.966  | O |
| HETATM 401 H | 0 | 3.632  | 1.450  | 1.162  | H |
| HETATM 402 C | 0 | 6.192  | 0.827  | 1.031  | C |
| HETATM 403 O | 0 | 5.909  | -0.200 | 0.241  | O |
| HETATM 404 H | 0 | 4.916  | -0.239 | 0.052  | H |
| HETATM 405 O | 0 | 5.332  | 1.583  | 1.491  | O |
| HETATM 406 C | 0 | 7.663  | 0.983  | 1.294  | C |
| HETATM 407 H | 0 | 8.089  | 0.037  | 1.639  | H |
| HETATM 408 H | 0 | 8.173  | 1.239  | 0.359  | H |
| HETATM 409 H | 0 | 7.842  | 1.764  | 2.030  | H |
| HETATM 410 C | 0 | 1.036  | 0.208  | -0.301 | C |
| HETATM 411 C | 0 | 0.009  | 0.939  | 0.177  | C |
| HETATM 412 H | 0 | 0.900  | -0.595 | -1.018 | H |
| HETATM 413 H | 0 | 0.240  | 1.710  | 0.910  | H |
| HETATM 414 C | 0 | -1.405 | 0.803  | -0.174 | C |
| HETATM 415 C | 0 | -1.864 | -0.043 | -1.203 | C |
| HETATM 416 C | 0 | -2.358 | 1.551  | 0.541  | C |
| HETATM 417 C | 0 | -3.718 | 1.447  | 0.261  | C |
| HETATM 418 C | 0 | -3.216 | -0.150 | -1.500 | C |
| HETATM 419 C | 0 | -4.136 | 0.593  | -0.756 | C |
| HETATM 420 H | 0 | -2.027 | 2.218  | 1.333  | H |
| HETATM 421 H | 0 | -4.454 | 2.016  | 0.820  | H |
| HETATM 422 H | 0 | -1.155 | -0.617 | -1.791 | H |
| HETATM 423 H | 0 | -3.553 | -0.799 | -2.300 | H |
| HETATM 424 O | 0 | -5.502 | 0.584  | -1.060 | O |
| HETATM 425 C | 0 | -6.190 | -0.603 | -1.093 | C |

|        |     |   |   |        |        |        |   |
|--------|-----|---|---|--------|--------|--------|---|
| HETATM | 426 | O | 0 | -5.682 | -1.668 | -0.824 | O |
| HETATM | 427 | C | 0 | -7.624 | -0.373 | -1.479 | C |
| HETATM | 428 | H | 0 | -8.146 | 0.149  | -0.669 | H |
| HETATM | 429 | H | 0 | -7.688 | 0.262  | -2.367 | H |
| HETATM | 430 | H | 0 | -8.115 | -1.328 | -1.663 | H |
| HETATM | 431 | H | 0 | 7.011  | -2.971 | 4.820  | H |
| HETATM | 432 | H | 0 | 7.150  | -1.635 | 3.618  | H |
| HETATM | 433 | H | 0 | -1.240 | 8.450  | -3.446 | H |
| HETATM | 434 | H | 0 | 0.471  | 8.886  | -2.165 | H |
| HETATM | 435 | H | 0 | 3.260  | -2.791 | -7.537 | H |
| HETATM | 436 | H | 0 | 1.190  | -4.268 | -7.293 | H |
| HETATM | 437 | H | 0 | 2.212  | -8.257 | 1.245  | H |
| HETATM | 438 | H | 0 | -1.844 | -7.843 | 3.685  | H |
| HETATM | 439 | H | 0 | 4.762  | -0.619 | 8.759  | H |
| HETATM | 440 | H | 0 | -0.787 | 1.235  | 8.195  | H |
| HETATM | 441 | H | 0 | -3.385 | 3.208  | 7.514  | H |

END

CONNECT 1 2 6 7

CONNECT 2 1 3 30

CONNECT 3 2 4 39

CONNECT 4 3 5 34

CONNECT 5 4 6 8

CONNECT 6 1 5 250

CONNECT 7 1 17 251 252

CONNECT 8 5 12 253 254

CONNECT 9 10 14 33

CONNECT 10 9 11 57



CONNECT 11 10 12 35  
CONNECT 12 8 11 13  
CONNECT 13 12 14 255  
CONNECT 14 13 9 20  
CONNECT 15 16 19 29  
CONNECT 16 15 45 228  
CONNECT 17 7 18 228  
CONNECT 18 17 19 256  
CONNECT 19 15 18 21  
CONNECT 20 14 25 257 258  
CONNECT 21 19 27 260 261  
CONNECT 22 23 27 28  
CONNECT 23 22 24 51  
CONNECT 24 23 25 32  
CONNECT 25 20 24 26  
CONNECT 26 25 27 259  
CONNECT 27 21 22 26  
CONNECT 28 22 344  
CONNECT 29 15 344  
CONNECT 30 2 350  
CONNECT 31 228 350  
CONNECT 32 24 362  
CONNECT 33 9 362  
CONNECT 34 4 356  
CONNECT 35 11 356  
CONNECT 36 37 41 99  
CONNECT 37 36 38 262

CONNECT 38 37 39 263  
CONNECT 39 3 38 40  
CONNECT 40 39 41 264  
CONNECT 41 36 40 265  
CONNECT 42 43 47 87  
CONNECT 43 42 44 266  
CONNECT 44 43 45 267  
CONNECT 45 16 44 46  
CONNECT 46 45 47 268  
CONNECT 47 46 42 269  
CONNECT 48 49 53 75  
CONNECT 49 48 50 270  
CONNECT 50 49 51 271  
CONNECT 51 50 23 52  
CONNECT 52 51 53 272  
CONNECT 53 48 52 273  
CONNECT 54 55 59 63  
CONNECT 55 54 56 274  
CONNECT 56 55 57 275  
CONNECT 57 10 56 58  
CONNECT 58 57 59 276  
CONNECT 59 58 54 277  
CONNECT 60 61 65 69  
CONNECT 61 60 62 436  
CONNECT 62 61 63 278  
CONNECT 63 54 62 64  
CONNECT 64 63 65 279

CONNECT 65 60 64  
CONNECT 66 67 71 280  
CONNECT 67 66 68 235  
CONNECT 68 67 69  
CONNECT 69 60 68 70  
CONNECT 70 69 71 281  
CONNECT 71 66 70 282  
CONNECT 72 73 77 81  
CONNECT 73 72 74 438  
CONNECT 74 73 75 283  
CONNECT 75 48 74 76  
CONNECT 76 75 77 284  
CONNECT 77 76 72  
CONNECT 78 79 83 285  
CONNECT 79 78 80 247  
CONNECT 80 79 81  
CONNECT 81 72 80 82  
CONNECT 82 81 83 286  
CONNECT 83 78 82 287  
CONNECT 84 85 89 93  
CONNECT 85 84 86 441  
CONNECT 86 85 87 288  
CONNECT 87 42 86 88  
CONNECT 88 87 89 289  
CONNECT 89 84 88  
CONNECT 90 91 95 290  
CONNECT 91 90 92 291

CONNECT 92 91 93 292

CONNECT 93 84 92 94

CONNECT 94 93 95

CONNECT 95 90 94 221

CONNECT 96 97 101 105

CONNECT 97 96 98

CONNECT 98 97 99 293

CONNECT 99 36 98 100

CONNECT 100 99 101 294

CONNECT 101 96 100 433

CONNECT 102 103 107 295

CONNECT 103 102 104 229

CONNECT 104 103 105

CONNECT 105 96 104 106

CONNECT 106 105 107 296

CONNECT 107 106 102 297

CONNECT 108 109 113 114

CONNECT 109 108 110 138

CONNECT 110 109 111 147

CONNECT 111 110 112 142

CONNECT 112 111 113 115

CONNECT 113 108 112 298

CONNECT 114 108 125 299 300

CONNECT 115 112 119 301 302

CONNECT 116 117 121 141

CONNECT 117 116 118 165

CONNECT 118 117 119 143

CONNECT 119 118 115 120

CONNECT 120 119 121 303

CONNECT 121 116 120 128

CONNECT 122 123 127 137

CONNECT 123 122 124 153

CONNECT 124 123 125 139

CONNECT 125 114 124 126

CONNECT 126 125 127 304

CONNECT 127 122 126 129

CONNECT 128 121 133 305 306

CONNECT 129 127 135 308 309

CONNECT 130 131 135 136

CONNECT 131 130 132 159

CONNECT 132 131 133 140

CONNECT 133 128 132 134

CONNECT 134 133 135 307

CONNECT 135 129 130 134

CONNECT 136 130 345

CONNECT 137 122 345

CONNECT 138 109 351

CONNECT 139 124 351

CONNECT 140 132 363

CONNECT 141 116 363

CONNECT 142 111 357

CONNECT 143 118 357

CONNECT 144 145 149 208

CONNECT 145 144 146 310

CONNECT 146 145 147 311  
CONNECT 147 110 146 148  
CONNECT 148 147 149 312  
CONNECT 149 144 148 313  
CONNECT 150 151 155 196  
CONNECT 151 150 152 314  
CONNECT 152 151 153 315  
CONNECT 153 152 123 154  
CONNECT 154 153 155 316  
CONNECT 155 150 154 317  
CONNECT 156 157 161 184  
CONNECT 157 156 158 318  
CONNECT 158 157 159 319  
CONNECT 159 158 131 160  
CONNECT 160 159 161 320  
CONNECT 161 156 160 321  
CONNECT 162 163 167 171  
CONNECT 163 162 164 439  
CONNECT 164 163 165 322  
CONNECT 165 117 164 166  
CONNECT 166 165 167 323  
CONNECT 167 162 166 324  
CONNECT 168 169 173 179  
CONNECT 169 168 170 440  
CONNECT 170 169 171 325  
CONNECT 171 170 162 172  
CONNECT 172 171 173 326

CONNECT 173 168 172  
CONNECT 174 175 180 327  
CONNECT 175 174 176 217  
CONNECT 176 175 179  
CONNECT 177 178 179 180  
CONNECT 178 177  
CONNECT 179 168 176 177  
CONNECT 180 174 177 328  
CONNECT 181 182 186 190  
CONNECT 182 181 183  
CONNECT 183 182 184 329  
CONNECT 184 156 183 185  
CONNECT 185 184 186 330  
CONNECT 186 181 185 437  
CONNECT 187 188 192 331  
CONNECT 188 187 189 239  
CONNECT 189 188 190  
CONNECT 190 189 181 191  
CONNECT 191 190 192 332  
CONNECT 192 187 191 333  
CONNECT 193 194 198 202  
CONNECT 194 193 195  
CONNECT 195 194 196 334  
CONNECT 196 150 195 197  
CONNECT 197 196 198 335  
CONNECT 198 193 197 435  
CONNECT 199 200 204 336

CONNECT 200 199 201 337

CONNECT 201 200 202 338

CONNECT 202 201 193 203

CONNECT 203 202 204

CONNECT 204 199 203 232

CONNECT 205 206 210 214

CONNECT 206 205 207

CONNECT 207 206 208 339

CONNECT 208 207 144 209

CONNECT 209 208 210 340

CONNECT 210 205 209 434

CONNECT 211 212 216 341

CONNECT 212 211 213 342

CONNECT 213 212 214 343

CONNECT 214 205 213 215

CONNECT 215 214 216

CONNECT 216 211 215 224

CONNECT 217 175 218 219 220

CONNECT 218 217

CONNECT 219 217

CONNECT 220 217 375 376 378

CONNECT 221 95 222 223 381

CONNECT 222 221

CONNECT 223 221

CONNECT 224 216 225 226 227

CONNECT 225 224

CONNECT 226 224



CONNECT 227 224 366 367 368

CONNECT 228 17 16 31

CONNECT 229 103 230 231 372

CONNECT 230 229

CONNECT 231 229

CONNECT 232 204 233 234 390

CONNECT 233 232

CONNECT 234 232

CONNECT 235 67 236 237 238

CONNECT 236 235 384 385 386

CONNECT 237 235

CONNECT 238 235

CONNECT 239 188 240 241 242

CONNECT 240 239

CONNECT 241 239

CONNECT 242 239 243 244 245

CONNECT 243 242

CONNECT 244 242

CONNECT 245 242 246 393

CONNECT 246 245

CONNECT 247 79 248 249 395

CONNECT 248 247

CONNECT 249 247

CONNECT 250 6

CONNECT 251 7

CONNECT 252 7

CONNECT 253 8

CONNECT 254 8  
CONNECT 255 13  
CONNECT 256 18  
CONNECT 257 20  
CONNECT 258 20  
CONNECT 259 26  
CONNECT 260 21  
CONNECT 261 21  
CONNECT 262 37  
CONNECT 263 38  
CONNECT 264 40  
CONNECT 265 41  
CONNECT 266 43  
CONNECT 267 44  
CONNECT 268 46  
CONNECT 269 47  
CONNECT 270 49  
CONNECT 271 50  
CONNECT 272 52  
CONNECT 273 53  
CONNECT 274 55  
CONNECT 275 56  
CONNECT 276 58  
CONNECT 277 59  
CONNECT 278 62  
CONNECT 279 64  
CONNECT 280 66

CONNECT 281 70  
CONNECT 282 71  
CONNECT 283 74  
CONNECT 284 76  
CONNECT 285 78  
CONNECT 286 82  
CONNECT 287 83  
CONNECT 288 86  
CONNECT 289 88  
CONNECT 290 90  
CONNECT 291 91  
CONNECT 292 92  
CONNECT 293 98  
CONNECT 294 100  
CONNECT 295 102  
CONNECT 296 106  
CONNECT 297 107  
CONNECT 298 113  
CONNECT 299 114  
CONNECT 300 114  
CONNECT 301 115  
CONNECT 302 115  
CONNECT 303 120  
CONNECT 304 126  
CONNECT 305 128  
CONNECT 306 128  
CONNECT 307 134

CONNECT 308 129  
CONNECT 309 129  
CONNECT 310 145  
CONNECT 311 146  
CONNECT 312 148  
CONNECT 313 149  
CONNECT 314 151  
CONNECT 315 152  
CONNECT 316 154  
CONNECT 317 155  
CONNECT 318 157  
CONNECT 319 158  
CONNECT 320 160  
CONNECT 321 161  
CONNECT 322 164  
CONNECT 323 166  
CONNECT 324 167  
CONNECT 325 170  
CONNECT 326 172  
CONNECT 327 174  
CONNECT 328 180  
CONNECT 329 183  
CONNECT 330 185  
CONNECT 331 187  
CONNECT 332 191  
CONNECT 333 192  
CONNECT 334 195

CONNECT 335 197  
CONNECT 336 199  
CONNECT 337 200  
CONNECT 338 201  
CONNECT 339 207  
CONNECT 340 209  
CONNECT 341 211  
CONNECT 342 212  
CONNECT 343 213  
CONNECT 344 28 29 346 347  
CONNECT 345 136 137 348 349  
CONNECT 346 344  
CONNECT 347 344  
CONNECT 348 345  
CONNECT 349 345  
CONNECT 350 30 31 352 353  
CONNECT 351 138 139 354 355  
CONNECT 352 350  
CONNECT 353 350  
CONNECT 354 351  
CONNECT 355 351  
CONNECT 356 34 35 358 359  
CONNECT 357 142 143 360 361  
CONNECT 358 356  
CONNECT 359 356  
CONNECT 360 357  
CONNECT 361 357

CONNECT 362 32 33 364 365

CONNECT 363 141 140 431 432

CONNECT 364 362

CONNECT 365 362

CONNECT 366 227

CONNECT 367 227

CONNECT 368 227 369 370

CONNECT 369 368

CONNECT 370 368 371 372

CONNECT 371 370

CONNECT 372 229 370 373 374

CONNECT 373 372

CONNECT 374 372

CONNECT 375 220

CONNECT 376 220 377 379

CONNECT 377 376

CONNECT 378 220

CONNECT 379 376 380 381

CONNECT 380 379

CONNECT 381 221 379 382 383

CONNECT 382 381

CONNECT 383 381

CONNECT 384 236

CONNECT 385 236

CONNECT 386 236 387 388

CONNECT 387 386

CONNECT 388 386 389 390

CONNECT 389 388

CONNECT 390 232 388 391 392

CONNECT 391 390

CONNECT 392 390

CONNECT 393 245 394 395

CONNECT 394 393

CONNECT 395 393 247 396 397

CONNECT 396 395

CONNECT 397 395

CONNECT 398 399 400 410

CONNECT 399 398

CONNECT 400 398 401

CONNECT 401 400

CONNECT 402 403 405 406

CONNECT 403 402 404

CONNECT 404 403

CONNECT 405 402

CONNECT 406 402 407 408 409

CONNECT 407 406

CONNECT 408 406

CONNECT 409 406

CONNECT 410 398 411 412

CONNECT 411 410 413 414

CONNECT 412 410

CONNECT 413 411

CONNECT 414 411 415 416

CONNECT 415 414 418 422

CONNECT 416 414 417 420

CONNECT 417 416 419 421

CONNECT 418 415 419 423

CONNECT 419 417 418 424

CONNECT 420 416

CONNECT 421 417

CONNECT 422 415

CONNECT 423 418

CONNECT 424 419 425

CONNECT 425 424 426 427

CONNECT 426 425

CONNECT 427 425 428 429 430

CONNECT 428 427

CONNECT 429 427

CONNECT 430 427

CONNECT 431 363

CONNECT 432 363

CONNECT 433 101

CONNECT 434 210

CONNECT 435 198

CONNECT 436 61

CONNECT 437 186

CONNECT 438 73

CONNECT 439 163

CONNECT 440 169

CONNECT 441 85



**Table S5.** PDB file of **G2a•G2a•M1**

REMARK 1 File created by GaussView 6.1.1

|        |    |   |     |   |        |        |        |   |
|--------|----|---|-----|---|--------|--------|--------|---|
| HETATM | 1  | C | MOL | 1 | 14.681 | -2.831 | -0.194 | C |
| HETATM | 2  | C | MOL | 1 | 13.476 | -3.550 | -0.249 | C |
| HETATM | 3  | C | MOL | 1 | 12.729 | -3.653 | -1.444 | C |
| HETATM | 4  | C | MOL | 1 | 13.197 | -2.938 | -2.569 | C |
| HETATM | 5  | C | MOL | 1 | 14.387 | -2.201 | -2.539 | C |
| HETATM | 6  | C | MOL | 1 | 15.114 | -2.176 | -1.348 | C |
| HETATM | 7  | C | MOL | 1 | 15.466 | -2.719 | 1.102  | C |
| HETATM | 8  | C | MOL | 1 | 14.830 | -1.398 | -3.750 | C |
| HETATM | 9  | C | MOL | 1 | 12.854 | 2.449  | -3.619 | C |
| HETATM | 10 | C | MOL | 1 | 12.187 | 1.355  | -4.212 | C |
| HETATM | 11 | C | MOL | 1 | 12.867 | 0.121  | -4.271 | C |
| HETATM | 12 | C | MOL | 1 | 14.166 | -0.034 | -3.769 | C |
| HETATM | 13 | C | MOL | 1 | 14.790 | 1.083  | -3.213 | C |
| HETATM | 14 | C | MOL | 1 | 14.165 | 2.328  | -3.127 | C |
| HETATM | 15 | C | MOL | 1 | 13.725 | 0.526  | 3.363  | C |
| HETATM | 16 | C | MOL | 1 | 13.188 | -0.773 | 3.501  | C |
| HETATM | 17 | C | MOL | 1 | 14.920 | -1.595 | 1.961  | C |
| HETATM | 18 | C | MOL | 1 | 15.437 | -0.302 | 1.888  | C |
| HETATM | 19 | C | MOL | 1 | 14.863 | 0.769  | 2.576  | C |
| HETATM | 20 | C | MOL | 1 | 14.863 | 3.494  | -2.450 | C |
| HETATM | 21 | C | MOL | 1 | 15.417 | 2.174  | 2.428  | C |
| HETATM | 22 | C | MOL | 1 | 13.483 | 3.607  | 1.643  | C |
| HETATM | 23 | C | MOL | 1 | 12.765 | 4.308  | 0.655  | C |
| HETATM | 24 | C | MOL | 1 | 13.260 | 4.275  | -0.661 | C |
| HETATM | 25 | C | MOL | 1 | 14.438 | 3.598  | -0.997 | C |

|        |    |   |     |   |        |        |        |   |
|--------|----|---|-----|---|--------|--------|--------|---|
| HETATM | 26 | C | MOL | 1 | 15.139 | 2.956  | 0.026  | C |
| HETATM | 27 | C | MOL | 1 | 14.681 | 2.942  | 1.345  | C |
| HETATM | 28 | O | MOL | 1 | 13.033 | 3.646  | 2.950  | O |
| HETATM | 29 | O | MOL | 1 | 13.176 | 1.557  | 4.104  | O |
| HETATM | 30 | O | MOL | 1 | 13.062 | -4.272 | 0.859  | O |
| HETATM | 31 | O | MOL | 1 | 13.327 | -3.108 | 2.923  | O |
| HETATM | 32 | O | MOL | 1 | 12.576 | 4.963  | -1.653 | O |
| HETATM | 33 | O | MOL | 1 | 12.234 | 3.687  | -3.639 | O |
| HETATM | 34 | O | MOL | 1 | 12.482 | -3.018 | -3.753 | O |
| HETATM | 35 | O | MOL | 1 | 12.247 | -0.949 | -4.895 | O |
| HETATM | 36 | C | MOL | 1 | 9.322  | -6.327 | -1.776 | C |
| HETATM | 37 | C | MOL | 1 | 10.400 | -6.381 | -2.678 | C |
| HETATM | 38 | C | MOL | 1 | 11.482 | -5.516 | -2.566 | C |
| HETATM | 39 | C | MOL | 1 | 11.535 | -4.541 | -1.555 | C |
| HETATM | 40 | C | MOL | 1 | 10.449 | -4.467 | -0.671 | C |
| HETATM | 41 | C | MOL | 1 | 9.371  | -5.343 | -0.773 | C |
| HETATM | 42 | C | MOL | 1 | 9.772  | -1.608 | 6.037  | C |
| HETATM | 43 | C | MOL | 1 | 11.028 | -2.187 | 6.289  | C |
| HETATM | 44 | C | MOL | 1 | 12.125 | -1.914 | 5.477  | C |
| HETATM | 45 | C | MOL | 1 | 12.011 | -1.050 | 4.376  | C |
| HETATM | 46 | C | MOL | 1 | 10.757 | -0.479 | 4.116  | C |
| HETATM | 47 | C | MOL | 1 | 9.662  | -0.748 | 4.933  | C |
| HETATM | 48 | C | MOL | 1 | 9.221  | 6.635  | 1.534  | C |
| HETATM | 49 | C | MOL | 1 | 10.450 | 7.252  | 1.248  | C |
| HETATM | 50 | C | MOL | 1 | 11.585 | 6.496  | 0.971  | C |
| HETATM | 51 | C | MOL | 1 | 11.536 | 5.095  | 0.979  | C |
| HETATM | 52 | C | MOL | 1 | 10.314 | 4.473  | 1.271  | C |

|        |    |   |     |   |        |        |        |   |
|--------|----|---|-----|---|--------|--------|--------|---|
| HETATM | 53 | C | MOL | 1 | 9.176  | 5.231  | 1.541  | C |
| HETATM | 54 | C | MOL | 1 | 8.124  | 1.555  | -5.710 | C |
| HETATM | 55 | C | MOL | 1 | 9.202  | 1.282  | -6.571 | C |
| HETATM | 56 | C | MOL | 1 | 10.510 | 1.237  | -6.097 | C |
| HETATM | 57 | C | MOL | 1 | 10.797 | 1.468  | -4.743 | C |
| HETATM | 58 | C | MOL | 1 | 9.724  | 1.753  | -3.888 | C |
| HETATM | 59 | C | MOL | 1 | 8.416  | 1.800  | -4.359 | C |
| HETATM | 60 | C | MOL | 1 | 4.055  | 1.522  | -6.942 | C |
| HETATM | 61 | N | MOL | 1 | 4.393  | 1.088  | -5.714 | N |
| HETATM | 62 | C | MOL | 1 | 5.677  | 1.103  | -5.367 | C |
| HETATM | 63 | C | MOL | 1 | 6.724  | 1.557  | -6.191 | C |
| HETATM | 64 | C | MOL | 1 | 6.354  | 1.994  | -7.473 | C |
| HETATM | 65 | C | MOL | 1 | 5.019  | 1.973  | -7.856 | C |
| HETATM | 66 | C | MOL | 1 | -0.039 | 1.550  | -7.977 | C |
| HETATM | 67 | C | MOL | 1 | 0.977  | 1.890  | -8.881 | C |
| HETATM | 68 | N | MOL | 1 | 2.272  | 1.870  | -8.535 | N |
| HETATM | 69 | C | MOL | 1 | 2.607  | 1.510  | -7.284 | C |
| HETATM | 70 | C | MOL | 1 | 1.653  | 1.147  | -6.322 | C |
| HETATM | 71 | C | MOL | 1 | 0.310  | 1.172  | -6.682 | C |
| HETATM | 72 | C | MOL | 1 | 5.838  | 9.081  | 2.317  | C |
| HETATM | 73 | N | MOL | 1 | 7.032  | 9.398  | 2.850  | N |
| HETATM | 74 | C | MOL | 1 | 8.071  | 8.606  | 2.594  | C |
| HETATM | 75 | C | MOL | 1 | 8.011  | 7.446  | 1.802  | C |
| HETATM | 76 | C | MOL | 1 | 6.752  | 7.116  | 1.277  | C |
| HETATM | 77 | C | MOL | 1 | 5.660  | 7.934  | 1.530  | C |
| HETATM | 78 | C | MOL | 1 | 2.587  | 11.685 | 3.015  | C |
| HETATM | 79 | C | MOL | 1 | 2.519  | 10.605 | 2.125  | C |

|        |     |   |     |   |       |         |        |   |
|--------|-----|---|-----|---|-------|---------|--------|---|
| HETATM | 80  | N | MOL | 1 | 3.561 | 9.783   | 1.927  | N |
| HETATM | 81  | C | MOL | 1 | 4.707 | 10.010  | 2.590  | C |
| HETATM | 82  | C | MOL | 1 | 4.859 | 11.071  | 3.495  | C |
| HETATM | 83  | C | MOL | 1 | 3.775 | 11.914  | 3.709  | C |
| HETATM | 84  | C | MOL | 1 | 6.331 | -2.459  | 8.391  | C |
| HETATM | 85  | N | MOL | 1 | 6.198 | -2.212  | 7.077  | N |
| HETATM | 86  | C | MOL | 1 | 7.297 | -1.956  | 6.370  | C |
| HETATM | 87  | C | MOL | 1 | 8.602 | -1.904  | 6.896  | C |
| HETATM | 88  | C | MOL | 1 | 8.720 | -2.155  | 8.271  | C |
| HETATM | 89  | C | MOL | 1 | 7.585 | -2.440  | 9.021  | C |
| HETATM | 90  | C | MOL | 1 | 2.772 | -3.308  | 10.509 | C |
| HETATM | 91  | C | MOL | 1 | 3.913 | -4.036  | 10.828 | C |
| HETATM | 92  | C | MOL | 1 | 5.097 | -3.762  | 10.147 | C |
| HETATM | 93  | C | MOL | 1 | 5.089 | -2.766  | 9.160  | C |
| HETATM | 94  | N | MOL | 1 | 3.987 | -2.061  | 8.853  | N |
| HETATM | 95  | C | MOL | 1 | 2.850 | -2.321  | 9.514  | C |
| HETATM | 96  | C | MOL | 1 | 6.135 | -9.123  | -2.123 | C |
| HETATM | 97  | C | MOL | 1 | 5.865 | -7.875  | -1.544 | C |
| HETATM | 98  | C | MOL | 1 | 6.891 | -6.947  | -1.434 | C |
| HETATM | 99  | C | MOL | 1 | 8.184 | -7.269  | -1.878 | C |
| HETATM | 100 | C | MOL | 1 | 8.344 | -8.557  | -2.422 | C |
| HETATM | 101 | N | MOL | 1 | 7.366 | -9.450  | -2.556 | N |
| HETATM | 102 | C | MOL | 1 | 3.019 | -11.935 | -2.570 | C |
| HETATM | 103 | C | MOL | 1 | 2.892 | -10.771 | -1.797 | C |
| HETATM | 104 | N | MOL | 1 | 3.895 | -9.892  | -1.672 | N |
| HETATM | 105 | C | MOL | 1 | 5.063 | -10.140 | -2.291 | C |
| HETATM | 106 | C | MOL | 1 | 5.278 | -11.288 | -3.065 | C |

|        |     |   |     |   |         |         |        |   |
|--------|-----|---|-----|---|---------|---------|--------|---|
| HETATM | 107 | C | MOL | 1 | 4.230   | -12.192 | -3.208 | C |
| HETATM | 108 | C | MOL | 1 | -14.413 | -3.704  | 0.182  | C |
| HETATM | 109 | C | MOL | 1 | -13.181 | -4.257  | 0.560  | C |
| HETATM | 110 | C | MOL | 1 | -12.599 | -3.982  | 1.812  | C |
| HETATM | 111 | C | MOL | 1 | -13.277 | -3.099  | 2.674  | C |
| HETATM | 112 | C | MOL | 1 | -14.513 | -2.536  | 2.329  | C |
| HETATM | 113 | C | MOL | 1 | -15.060 | -2.859  | 1.086  | C |
| HETATM | 114 | C | MOL | 1 | -14.971 | -3.944  | -1.210 | C |
| HETATM | 115 | C | MOL | 1 | -15.189 | -1.550  | 3.264  | C |
| HETATM | 116 | C | MOL | 1 | -13.653 | 2.432   | 2.583  | C |
| HETATM | 117 | C | MOL | 1 | -12.956 | 1.581   | 3.469  | C |
| HETATM | 118 | C | MOL | 1 | -13.472 | 0.281   | 3.673  | C |
| HETATM | 119 | C | MOL | 1 | -14.658 | -0.143  | 3.055  | C |
| HETATM | 120 | C | MOL | 1 | -15.311 | 0.743   | 2.197  | C |
| HETATM | 121 | C | MOL | 1 | -14.827 | 2.025   | 1.935  | C |
| HETATM | 122 | C | MOL | 1 | -13.138 | -1.045  | -3.846 | C |
| HETATM | 123 | C | MOL | 1 | -12.477 | -2.269  | -3.609 | C |
| HETATM | 124 | C | MOL | 1 | -13.110 | -3.206  | -2.769 | C |
| HETATM | 125 | C | MOL | 1 | -14.365 | -2.961  | -2.196 | C |
| HETATM | 126 | C | MOL | 1 | -14.995 | -1.752  | -2.491 | C |
| HETATM | 127 | C | MOL | 1 | -14.407 | -0.784  | -3.307 | C |
| HETATM | 128 | C | MOL | 1 | -15.495 | 2.919   | 0.907  | C |
| HETATM | 129 | C | MOL | 1 | -15.099 | 0.542   | -3.561 | C |
| HETATM | 130 | C | MOL | 1 | -13.451 | 2.331   | -2.856 | C |
| HETATM | 131 | C | MOL | 1 | -12.968 | 3.302   | -1.960 | C |
| HETATM | 132 | C | MOL | 1 | -13.662 | 3.483   | -0.750 | C |
| HETATM | 133 | C | MOL | 1 | -14.824 | 2.761   | -0.445 | C |

|        |     |   |     |   |         |        |        |   |
|--------|-----|---|-----|---|---------|--------|--------|---|
| HETATM | 134 | C | MOL | 1 | -15.288 | 1.841  | -1.386 | C |
| HETATM | 135 | C | MOL | 1 | -14.620 | 1.603  | -2.589 | C |
| HETATM | 136 | O | MOL | 1 | -12.798 | 2.151  | -4.063 | O |
| HETATM | 137 | O | MOL | 1 | -12.566 | -0.136 | -4.717 | O |
| HETATM | 138 | O | MOL | 1 | -12.539 | -5.147 | -0.285 | O |
| HETATM | 139 | O | MOL | 1 | -12.494 | -4.431 | -2.554 | O |
| HETATM | 140 | O | MOL | 1 | -13.208 | 4.449  | 0.137  | O |
| HETATM | 141 | O | MOL | 1 | -13.191 | 3.725  | 2.402  | O |
| HETATM | 142 | O | MOL | 1 | -12.743 | -2.843 | 3.926  | O |
| HETATM | 143 | O | MOL | 1 | -12.846 | -0.549 | 4.588  | O |
| HETATM | 144 | C | MOL | 1 | -8.928  | -5.850 | 3.150  | C |
| HETATM | 145 | C | MOL | 1 | -10.128 | -6.577 | 3.063  | C |
| HETATM | 146 | C | MOL | 1 | -11.301 | -5.979 | 2.610  | C |
| HETATM | 147 | C | MOL | 1 | -11.320 | -4.630 | 2.230  | C |
| HETATM | 148 | C | MOL | 1 | -10.119 | -3.911 | 2.284  | C |
| HETATM | 149 | C | MOL | 1 | -8.944  | -4.508 | 2.736  | C |
| HETATM | 150 | C | MOL | 1 | -8.694  | -3.213 | -5.501 | C |
| HETATM | 151 | C | MOL | 1 | -9.866  | -3.925 | -5.811 | C |
| HETATM | 152 | C | MOL | 1 | -11.075 | -3.622 | -5.194 | C |
| HETATM | 153 | C | MOL | 1 | -11.167 | -2.587 | -4.252 | C |
| HETATM | 154 | C | MOL | 1 | -10.000 | -1.876 | -3.936 | C |
| HETATM | 155 | C | MOL | 1 | -8.787  | -2.186 | -4.548 | C |
| HETATM | 156 | C | MOL | 1 | -9.598  | 5.854  | -2.897 | C |
| HETATM | 157 | C | MOL | 1 | -10.921 | 6.306  | -3.032 | C |
| HETATM | 158 | C | MOL | 1 | -11.996 | 5.476  | -2.731 | C |
| HETATM | 159 | C | MOL | 1 | -11.789 | 4.161  | -2.291 | C |
| HETATM | 160 | C | MOL | 1 | -10.472 | 3.701  | -2.160 | C |

|        |     |   |     |   |         |        |        |   |
|--------|-----|---|-----|---|---------|--------|--------|---|
| HETATM | 161 | C | MOL | 1 | -9.395  | 4.537  | -2.455 | C |
| HETATM | 162 | C | MOL | 1 | -9.407  | 2.993  | 5.530  | C |
| HETATM | 163 | C | MOL | 1 | -10.640 | 3.655  | 5.655  | C |
| HETATM | 164 | C | MOL | 1 | -11.778 | 3.198  | 4.996  | C |
| HETATM | 165 | C | MOL | 1 | -11.732 | 2.060  | 4.176  | C |
| HETATM | 166 | C | MOL | 1 | -10.500 | 1.405  | 4.040  | C |
| HETATM | 167 | C | MOL | 1 | -9.363  | 1.855  | 4.708  | C |
| HETATM | 168 | C | MOL | 1 | -5.852  | 4.384  | 7.410  | C |
| HETATM | 169 | N | MOL | 1 | -5.779  | 3.752  | 6.226  | N |
| HETATM | 170 | C | MOL | 1 | -6.912  | 3.333  | 5.666  | C |
| HETATM | 171 | C | MOL | 1 | -8.195  | 3.484  | 6.225  | C |
| HETATM | 172 | C | MOL | 1 | -8.250  | 4.134  | 7.467  | C |
| HETATM | 173 | C | MOL | 1 | -7.079  | 4.592  | 8.059  | C |
| HETATM | 174 | C | MOL | 1 | -2.197  | 5.739  | 9.044  | C |
| HETATM | 175 | C | MOL | 1 | -2.334  | 4.491  | 8.413  | C |
| HETATM | 176 | N | MOL | 1 | -3.500  | 4.074  | 7.902  | N |
| HETATM | 177 | C | MOL | 1 | -4.575  | 4.874  | 8.007  | C |
| HETATM | 178 | C | MOL | 1 | -4.525  | 6.128  | 8.631  | C |
| HETATM | 179 | C | MOL | 1 | -3.310  | 6.565  | 9.154  | C |
| HETATM | 180 | C | MOL | 1 | -6.428  | 8.518  | -3.848 | C |
| HETATM | 181 | C | MOL | 1 | -6.277  | 7.678  | -2.735 | C |
| HETATM | 182 | C | MOL | 1 | -7.298  | 6.791  | -2.418 | C |
| HETATM | 183 | C | MOL | 1 | -8.459  | 6.749  | -3.204 | C |
| HETATM | 184 | C | MOL | 1 | -8.494  | 7.620  | -4.308 | C |
| HETATM | 185 | N | MOL | 1 | -7.524  | 8.474  | -4.627 | N |
| HETATM | 186 | C | MOL | 1 | -3.435  | 11.343 | -4.794 | C |
| HETATM | 187 | C | MOL | 1 | -3.388  | 10.540 | -3.645 | C |

|        |     |   |     |   |        |        |        |   |
|--------|-----|---|-----|---|--------|--------|--------|---|
| HETATM | 188 | N | MOL | 1 | -4.341 | 9.639  | -3.370 | N |
| HETATM | 189 | C | MOL | 1 | -5.381 | 9.511  | -4.214 | C |
| HETATM | 190 | C | MOL | 1 | -5.504 | 10.277 | -5.381 | C |
| HETATM | 191 | C | MOL | 1 | -4.508 | 11.203 | -5.671 | C |
| HETATM | 192 | C | MOL | 1 | -5.002 | -4.264 | -7.328 | C |
| HETATM | 193 | C | MOL | 1 | -5.246 | -2.912 | -7.050 | C |
| HETATM | 194 | C | MOL | 1 | -6.451 | -2.552 | -6.461 | C |
| HETATM | 195 | C | MOL | 1 | -7.402 | -3.537 | -6.147 | C |
| HETATM | 196 | C | MOL | 1 | -7.050 | -4.860 | -6.468 | C |
| HETATM | 197 | N | MOL | 1 | -5.903 | -5.221 | -7.038 | N |
| HETATM | 198 | C | MOL | 1 | -1.323 | -5.423 | -9.049 | C |
| HETATM | 199 | C | MOL | 1 | -2.267 | -6.414 | -8.789 | C |
| HETATM | 200 | C | MOL | 1 | -3.489 | -6.056 | -8.228 | C |
| HETATM | 201 | C | MOL | 1 | -3.722 | -4.703 | -7.950 | C |
| HETATM | 202 | N | MOL | 1 | -2.815 | -3.744 | -8.209 | N |
| HETATM | 203 | C | MOL | 1 | -1.635 | -4.090 | -8.743 | C |
| HETATM | 204 | C | MOL | 1 | -5.311 | -7.452 | 4.708  | C |
| HETATM | 205 | C | MOL | 1 | -6.528 | -7.872 | 5.267  | C |
| HETATM | 206 | C | MOL | 1 | -7.721 | -7.371 | 4.759  | C |
| HETATM | 207 | C | MOL | 1 | -7.694 | -6.462 | 3.692  | C |
| HETATM | 208 | C | MOL | 1 | -6.422 | -6.147 | 3.179  | C |
| HETATM | 209 | N | MOL | 1 | -5.271 | -6.611 | 3.660  | N |
| HETATM | 210 | C | MOL | 1 | -1.571 | -8.682 | 6.253  | C |
| HETATM | 211 | C | MOL | 1 | -2.623 | -8.506 | 7.146  | C |
| HETATM | 212 | C | MOL | 1 | -3.864 | -8.111 | 6.653  | C |
| HETATM | 213 | C | MOL | 1 | -4.007 | -7.906 | 5.273  | C |
| HETATM | 214 | N | MOL | 1 | -2.991 | -8.078 | 4.411  | N |



|        |     |   |     |   |        |         |         |   |
|--------|-----|---|-----|---|--------|---------|---------|---|
| HETATM | 215 | C | MOL | 1 | -1.797 | -8.456  | 4.886   | C |
| HETATM | 216 | C | MOL | 1 | -1.164 | 3.535   | 8.337   | C |
| HETATM | 217 | C | MOL | 1 | 1.572  | -0.218  | 10.112  | C |
| HETATM | 218 | C | MOL | 1 | 1.653  | -1.457  | 9.185   | C |
| HETATM | 219 | C | MOL | 1 | -0.698 | -8.675  | 3.872   | C |
| HETATM | 220 | C | MOL | 1 | 13.809 | -1.814  | 2.783   | C |
| HETATM | 221 | C | MOL | 1 | 1.672  | -11.191 | 0.374   | C |
| HETATM | 222 | C | MOL | 1 | 1.637  | -10.484 | -1.004  | C |
| HETATM | 223 | C | MOL | 1 | -0.661 | -2.970  | -9.028  | C |
| HETATM | 224 | C | MOL | 1 | 0.850  | 1.070   | -11.295 | C |
| HETATM | 225 | C | MOL | 1 | 0.670  | 2.260   | -10.315 | C |
| HETATM | 226 | C | MOL | 1 | -2.242 | 10.644  | -2.665  | C |
| HETATM | 227 | C | MOL | 1 | 1.516  | 10.641  | -0.203  | C |
| HETATM | 228 | C | MOL | 1 | 1.281  | 10.340  | 1.298   | C |
| HETATM | 229 | C | MOL | 1 | -0.650 | -10.139 | 3.368   | C |
| HETATM | 230 | C | MOL | 1 | -1.009 | 2.716   | 9.643   | C |
| HETATM | 231 | C | MOL | 1 | -1.158 | 9.578   | -2.909  | C |
| HETATM | 232 | C | MOL | 1 | -0.804 | -2.403  | -10.463 | C |
| HETATM | 233 | H | MOL | 1 | 16.046 | -1.616  | -1.313  | H |
| HETATM | 234 | H | MOL | 1 | 16.518 | -2.522  | 0.868   | H |
| HETATM | 235 | H | MOL | 1 | 15.410 | -3.665  | 1.649   | H |
| HETATM | 236 | H | MOL | 1 | 15.918 | -1.271  | -3.719  | H |
| HETATM | 237 | H | MOL | 1 | 14.576 | -1.944  | -4.663  | H |
| HETATM | 238 | H | MOL | 1 | 15.802 | 0.979   | -2.825  | H |
| HETATM | 239 | H | MOL | 1 | 16.309 | -0.118  | 1.265   | H |
| HETATM | 240 | H | MOL | 1 | 15.947 | 3.346   | -2.505  | H |
| HETATM | 241 | H | MOL | 1 | 14.620 | 4.425   | -2.971  | H |

|        |     |   |     |   |        |        |        |   |
|--------|-----|---|-----|---|--------|--------|--------|---|
| HETATM | 242 | H | MOL | 1 | 16.063 | 2.434  | -0.216 | H |
| HETATM | 243 | H | MOL | 1 | 15.325 | 2.706  | 3.379  | H |
| HETATM | 244 | H | MOL | 1 | 16.480 | 2.115  | 2.171  | H |
| HETATM | 245 | H | MOL | 1 | 10.387 | -7.100 | -3.491 | H |
| HETATM | 246 | H | MOL | 1 | 12.298 | -5.590 | -3.277 | H |
| HETATM | 247 | H | MOL | 1 | 10.436 | -3.713 | 0.108  | H |
| HETATM | 248 | H | MOL | 1 | 8.570  | -5.277 | -0.042 | H |
| HETATM | 249 | H | MOL | 1 | 11.144 | -2.882 | 7.117  | H |
| HETATM | 250 | H | MOL | 1 | 13.080 | -2.383 | 5.690  | H |
| HETATM | 251 | H | MOL | 1 | 10.623 | 0.167  | 3.254  | H |
| HETATM | 252 | H | MOL | 1 | 8.713  | -0.267 | 4.717  | H |
| HETATM | 253 | H | MOL | 1 | 10.509 | 8.336  | 1.212  | H |
| HETATM | 254 | H | MOL | 1 | 12.520 | 6.995  | 0.734  | H |
| HETATM | 255 | H | MOL | 1 | 10.249 | 3.389  | 1.284  | H |
| HETATM | 256 | H | MOL | 1 | 8.244  | 4.727  | 1.783  | H |
| HETATM | 257 | H | MOL | 1 | 9.011  | 1.066  | -7.618 | H |
| HETATM | 258 | H | MOL | 1 | 11.320 | 1.001  | -6.780 | H |
| HETATM | 259 | H | MOL | 1 | 9.909  | 1.914  | -2.831 | H |
| HETATM | 260 | H | MOL | 1 | 7.613  | 2.035  | -3.667 | H |
| HETATM | 261 | H | MOL | 1 | 5.901  | 0.710  | -4.376 | H |
| HETATM | 262 | H | MOL | 1 | 7.109  | 2.372  | -8.157 | H |
| HETATM | 263 | H | MOL | 1 | 4.700  | 2.311  | -8.835 | H |
| HETATM | 264 | H | MOL | 1 | -1.078 | 1.581  | -8.289 | H |
| HETATM | 265 | H | MOL | 1 | 1.980  | 0.862  | -5.330 | H |
| HETATM | 266 | H | MOL | 1 | -0.457 | 0.903  | -5.961 | H |
| HETATM | 267 | H | MOL | 1 | 9.014  | 8.893  | 3.057  | H |
| HETATM | 268 | H | MOL | 1 | 6.641  | 6.236  | 0.649  | H |

|        |     |   |     |   |         |         |        |   |
|--------|-----|---|-----|---|---------|---------|--------|---|
| HETATM | 269 | H | MOL | 1 | 4.678   | 7.721   | 1.123  | H |
| HETATM | 270 | H | MOL | 1 | 1.725   | 12.330  | 3.156  | H |
| HETATM | 271 | H | MOL | 1 | 5.808   | 11.208  | 3.999  | H |
| HETATM | 272 | H | MOL | 1 | 3.853   | 12.744  | 4.407  | H |
| HETATM | 273 | H | MOL | 1 | 7.140   | -1.802  | 5.304  | H |
| HETATM | 274 | H | MOL | 1 | 9.691   | -2.099  | 8.755  | H |
| HETATM | 275 | H | MOL | 1 | 7.664   | -2.612  | 10.090 | H |
| HETATM | 276 | H | MOL | 1 | 1.829   | -3.497  | 11.016 | H |
| HETATM | 277 | H | MOL | 1 | 3.880   | -4.815  | 11.586 | H |
| HETATM | 278 | H | MOL | 1 | 6.000   | -4.329  | 10.351 | H |
| HETATM | 279 | H | MOL | 1 | 4.858   | -7.656  | -1.207 | H |
| HETATM | 280 | H | MOL | 1 | 6.684   | -5.963  | -1.022 | H |
| HETATM | 281 | H | MOL | 1 | 9.328   | -8.889  | -2.748 | H |
| HETATM | 282 | H | MOL | 1 | 2.182   | -12.623 | -2.661 | H |
| HETATM | 283 | H | MOL | 1 | 6.242   | -11.441 | -3.534 | H |
| HETATM | 284 | H | MOL | 1 | 4.355   | -13.088 | -3.811 | H |
| HETATM | 285 | H | MOL | 1 | -16.017 | -2.425  | 0.804  | H |
| HETATM | 286 | H | MOL | 1 | -16.058 | -3.818  | -1.193 | H |
| HETATM | 287 | H | MOL | 1 | -14.749 | -4.968  | -1.524 | H |
| HETATM | 288 | H | MOL | 1 | -16.269 | -1.557  | 3.080  | H |
| HETATM | 289 | H | MOL | 1 | -15.020 | -1.856  | 4.301  | H |
| HETATM | 290 | H | MOL | 1 | -16.227 | 0.419   | 1.707  | H |
| HETATM | 291 | H | MOL | 1 | -15.976 | -1.553  | -2.064 | H |
| HETATM | 292 | H | MOL | 1 | -16.553 | 2.647   | 0.823  | H |
| HETATM | 293 | H | MOL | 1 | -15.435 | 3.963   | 1.229  | H |
| HETATM | 294 | H | MOL | 1 | -16.194 | 1.278   | -1.169 | H |
| HETATM | 295 | H | MOL | 1 | -14.898 | 0.869   | -4.586 | H |

|        |     |   |     |   |         |        |        |   |
|--------|-----|---|-----|---|---------|--------|--------|---|
| HETATM | 296 | H | MOL | 1 | -16.180 | 0.411  | -3.451 | H |
| HETATM | 297 | H | MOL | 1 | -10.140 | -7.627 | 3.342  | H |
| HETATM | 298 | H | MOL | 1 | -12.216 | -6.562 | 2.556  | H |
| HETATM | 299 | H | MOL | 1 | -10.102 | -2.868 | 1.978  | H |
| HETATM | 300 | H | MOL | 1 | -8.037  | -3.913 | 2.802  | H |
| HETATM | 301 | H | MOL | 1 | -9.835  | -4.708 | -6.563 | H |
| HETATM | 302 | H | MOL | 1 | -11.967 | -4.185 | -5.455 | H |
| HETATM | 303 | H | MOL | 1 | -10.029 | -1.090 | -3.188 | H |
| HETATM | 304 | H | MOL | 1 | -7.895  | -1.638 | -4.259 | H |
| HETATM | 305 | H | MOL | 1 | -11.109 | 7.329  | -3.348 | H |
| HETATM | 306 | H | MOL | 1 | -13.011 | 5.852  | -2.827 | H |
| HETATM | 307 | H | MOL | 1 | -10.284 | 2.685  | -1.827 | H |
| HETATM | 308 | H | MOL | 1 | -8.383  | 4.152  | -2.363 | H |
| HETATM | 309 | H | MOL | 1 | -10.708 | 4.557  | 6.258  | H |
| HETATM | 310 | H | MOL | 1 | -12.714 | 3.737  | 5.108  | H |
| HETATM | 311 | H | MOL | 1 | -6.803  | 2.863  | 4.689  | H |
| HETATM | 312 | H | MOL | 1 | -9.200  | 4.255  | 7.979  | H |
| HETATM | 313 | H | MOL | 1 | -7.109  | 5.075  | 9.030  | H |
| HETATM | 314 | H | MOL | 1 | -1.232  | 6.048  | 9.435  | H |
| HETATM | 315 | H | MOL | 1 | -5.408  | 6.757  | 8.675  | H |
| HETATM | 316 | H | MOL | 1 | -3.232  | 7.540  | 9.627  | H |
| HETATM | 317 | H | MOL | 1 | -5.376  | 7.750  | -2.138 | H |
| HETATM | 318 | H | MOL | 1 | -7.211  | 6.150  | -1.544 | H |
| HETATM | 319 | H | MOL | 1 | -9.354  | 7.606  | -4.976 | H |
| HETATM | 320 | H | MOL | 1 | -2.646  | 12.065 | -4.986 | H |
| HETATM | 321 | H | MOL | 1 | -6.367  | 10.135 | -6.021 | H |
| HETATM | 322 | H | MOL | 1 | -4.570  | 11.815 | -6.568 | H |

|        |     |   |     |   |        |         |         |   |
|--------|-----|---|-----|---|--------|---------|---------|---|
| HETATM | 323 | H | MOL | 1 | -4.493 | -2.177  | -7.306  | H |
| HETATM | 324 | H | MOL | 1 | -6.667 | -1.506  | -6.261  | H |
| HETATM | 325 | H | MOL | 1 | -7.733 | -5.673  | -6.225  | H |
| HETATM | 326 | H | MOL | 1 | -0.355 | -5.672  | -9.475  | H |
| HETATM | 327 | H | MOL | 1 | -2.049 | -7.455  | -9.013  | H |
| HETATM | 328 | H | MOL | 1 | -4.255 | -6.786  | -7.994  | H |
| HETATM | 329 | H | MOL | 1 | -6.540 | -8.583  | 6.087   | H |
| HETATM | 330 | H | MOL | 1 | -8.668 | -7.663  | 5.204   | H |
| HETATM | 331 | H | MOL | 1 | -6.339 | -5.482  | 2.320   | H |
| HETATM | 332 | H | MOL | 1 | -0.587 | -8.980  | 6.602   | H |
| HETATM | 333 | H | MOL | 1 | -2.477 | -8.659  | 8.212   | H |
| HETATM | 334 | H | MOL | 1 | -4.695 | -7.930  | 7.327   | H |
| HETATM | 335 | H | MOL | 1 | -1.313 | 2.857   | 7.492   | H |
| HETATM | 336 | H | MOL | 1 | -0.239 | 4.098   | 8.156   | H |
| HETATM | 337 | H | MOL | 1 | 1.724  | -1.130  | 8.143   | H |
| HETATM | 338 | H | MOL | 1 | 0.732  | -2.045  | 9.290   | H |
| HETATM | 339 | H | MOL | 1 | -0.862 | -8.005  | 3.023   | H |
| HETATM | 340 | H | MOL | 1 | 0.272  | -8.418  | 4.318   | H |
| HETATM | 341 | C | MOL | 1 | 0.471  | -10.898 | 1.231   | C |
| HETATM | 342 | H | MOL | 1 | 1.555  | -9.403  | -0.855  | H |
| HETATM | 343 | H | MOL | 1 | 0.751  | -10.815 | -1.560  | H |
| HETATM | 344 | H | MOL | 1 | 0.367  | -3.328  | -8.887  | H |
| HETATM | 345 | H | MOL | 1 | -0.830 | -2.164  | -8.308  | H |
| HETATM | 346 | H | MOL | 1 | -0.357 | 2.640   | -10.391 | H |
| HETATM | 347 | H | MOL | 1 | 1.345  | 3.067   | -10.619 | H |
| HETATM | 348 | H | MOL | 1 | -1.790 | 11.641  | -2.737  | H |
| HETATM | 349 | H | MOL | 1 | -2.639 | 10.534  | -1.650  | H |

|        |     |   |     |   |         |         |         |   |
|--------|-----|---|-----|---|---------|---------|---------|---|
| HETATM | 350 | H | MOL | 1 | 0.986   | 9.289   | 1.405   | H |
| HETATM | 351 | H | MOL | 1 | 0.451   | 10.951  | 1.672   | H |
| HETATM | 352 | C | MOL | 1 | 0.527   | -10.406 | 2.472   | C |
| HETATM | 353 | C | MOL | 1 | 0.179   | -1.297  | -10.732 | C |
| HETATM | 354 | C | MOL | 1 | 12.346  | 2.509   | 3.453   | C |
| HETATM | 355 | C | MOL | 1 | -11.939 | 1.027   | -4.194  | C |
| HETATM | 356 | H | MOL | 1 | 11.776  | 2.031   | 2.652   | H |
| HETATM | 357 | H | MOL | 1 | 11.693  | 2.893   | 4.236   | H |
| HETATM | 358 | H | MOL | 1 | -11.460 | 0.806   | -3.237  | H |
| HETATM | 359 | H | MOL | 1 | -11.209 | 1.315   | -4.951  | H |
| HETATM | 360 | C | MOL | 1 | 12.439  | -3.592  | 1.937   | C |
| HETATM | 361 | C | MOL | 1 | -11.769 | -4.625  | -1.356  | C |
| HETATM | 362 | H | MOL | 1 | 11.819  | -2.769  | 1.562   | H |
| HETATM | 363 | H | MOL | 1 | 11.832  | -4.349  | 2.434   | H |
| HETATM | 364 | H | MOL | 1 | -11.280 | -3.691  | -1.052  | H |
| HETATM | 365 | H | MOL | 1 | -11.035 | -5.398  | -1.583  | H |
| HETATM | 366 | C | MOL | 1 | 11.626  | -1.938  | -4.093  | C |
| HETATM | 367 | C | MOL | 1 | -12.049 | -1.624  | 4.119   | C |
| HETATM | 368 | H | MOL | 1 | 11.199  | -1.489  | -3.189  | H |
| HETATM | 369 | H | MOL | 1 | 10.850  | -2.374  | -4.723  | H |
| HETATM | 370 | H | MOL | 1 | -11.537 | -1.340  | 3.194   | H |
| HETATM | 371 | H | MOL | 1 | -11.337 | -1.819  | 4.921   | H |
| HETATM | 372 | C | MOL | 1 | 11.674  | 4.225   | -2.452  | C |
| HETATM | 373 | C | MOL | 1 | -12.433 | 4.027   | 1.240   | C |
| HETATM | 374 | H | MOL | 1 | 11.214  | 3.432   | -1.853  | H |
| HETATM | 375 | H | MOL | 1 | 10.929  | 4.941   | -2.796  | H |
| HETATM | 376 | H | MOL | 1 | -11.807 | 3.170   | 0.964   | H |

|            |   |     |   |         |         |         |   |
|------------|---|-----|---|---------|---------|---------|---|
| HETATM 377 | H | MOL | 1 | -11.823 | 4.888   | 1.515   | H |
| HETATM 378 | C | MOL | 1 | 1.891   | 0.077   | -0.396  | C |
| HETATM 379 | O | MOL | 1 | 1.517   | -1.092  | -0.897  | O |
| HETATM 380 | H | MOL | 1 | 0.516   | -1.181  | -0.852  | H |
| HETATM 381 | O | MOL | 1 | 1.108   | 0.922   | 0.052   | O |
| HETATM 382 | H | MOL | 1 | -1.831  | -2.043  | -10.606 | H |
| HETATM 383 | H | MOL | 1 | -0.653  | -3.224  | -11.179 | H |
| HETATM 384 | H | MOL | 1 | 1.875   | 0.692   | -11.204 | H |
| HETATM 385 | C | MOL | 1 | -0.136  | -0.043  | -11.067 | C |
| HETATM 386 | H | MOL | 1 | 0.740   | 1.461   | -12.317 | H |
| HETATM 387 | C | MOL | 1 | 0.060   | 9.679   | -2.025  | C |
| HETATM 388 | H | MOL | 1 | -1.612  | 8.582   | -2.801  | H |
| HETATM 389 | H | MOL | 1 | -0.832  | 9.632   | -3.959  | H |
| HETATM 390 | C | MOL | 1 | 0.262   | 10.549  | -1.031  | C |
| HETATM 391 | H | MOL | 1 | 1.931   | 11.657  | -0.289  | H |
| HETATM 392 | H | MOL | 1 | 2.282   | 9.957   | -0.583  | H |
| HETATM 393 | H | MOL | 1 | -0.518  | 11.268  | -0.778  | H |
| HETATM 394 | H | MOL | 1 | 0.852   | 8.964   | -2.256  | H |
| HETATM 395 | H | MOL | 1 | 1.234   | -1.559  | -10.618 | H |
| HETATM 396 | H | MOL | 1 | -1.191  | 0.222   | -11.175 | H |
| HETATM 397 | H | MOL | 1 | -0.597  | -10.803 | 4.245   | H |
| HETATM 398 | H | MOL | 1 | -1.589  | -10.374 | 2.853   | H |
| HETATM 399 | H | MOL | 1 | 2.587   | -10.896 | 0.902   | H |
| HETATM 400 | H | MOL | 1 | 1.747   | -12.276 | 0.201   | H |
| HETATM 401 | H | MOL | 1 | -0.504  | -11.123 | 0.793   | H |
| HETATM 402 | H | MOL | 1 | 1.507   | -10.181 | 2.900   | H |
| HETATM 403 | C | MOL | 1 | 0.308   | 0.582   | 9.948   | C |

|            |   |     |   |        |        |        |   |
|------------|---|-----|---|--------|--------|--------|---|
| HETATM 404 | H | MOL | 1 | 1.637  | -0.569 | 11.154 | H |
| HETATM 405 | H | MOL | 1 | 2.451  | 0.415  | 9.942  | H |
| HETATM 406 | H | MOL | 1 | -1.890 | 2.075  | 9.774  | H |
| HETATM 407 | C | MOL | 1 | 0.250  | 1.893  | 9.699  | C |
| HETATM 408 | H | MOL | 1 | -1.008 | 3.421  | 10.489 | H |
| HETATM 409 | H | MOL | 1 | -0.626 | 0.032  | 10.085 | H |
| HETATM 410 | H | MOL | 1 | 1.184  | 2.443  | 9.559  | H |
| HETATM 411 | C | MOL | 1 | 3.342  | 0.323  | -0.395 | C |
| HETATM 412 | C | MOL | 1 | 4.242  | -0.577 | -0.835 | C |
| HETATM 413 | H | MOL | 1 | 3.623  | 1.288  | 0.015  | H |
| HETATM 414 | H | MOL | 1 | 3.859  | -1.524 | -1.207 | H |
| HETATM 415 | C | MOL | 1 | 5.697  | -0.432 | -0.848 | C |
| HETATM 416 | C | MOL | 1 | 6.357  | 0.770  | -0.528 | C |
| HETATM 417 | C | MOL | 1 | 6.486  | -1.546 | -1.188 | C |
| HETATM 418 | C | MOL | 1 | 7.876  | -1.477 | -1.182 | C |
| HETATM 419 | C | MOL | 1 | 7.744  | 0.858  | -0.526 | C |
| HETATM 420 | C | MOL | 1 | 8.496  | -0.277 | -0.844 | C |
| HETATM 421 | H | MOL | 1 | 6.000  | -2.481 | -1.451 | H |
| HETATM 422 | H | MOL | 1 | 8.483  | -2.340 | -1.436 | H |
| HETATM 423 | H | MOL | 1 | 5.778  | 1.655  | -0.282 | H |
| HETATM 424 | H | MOL | 1 | 8.233  | 1.790  | -0.273 | H |
| HETATM 425 | O | MOL | 1 | 9.890  | -0.268 | -0.933 | O |
| HETATM 426 | C | MOL | 1 | 10.671 | 0.352  | 0.005  | C |
| HETATM 427 | O | MOL | 1 | 10.223 | 0.934  | 0.969  | O |
| HETATM 428 | C | MOL | 1 | 12.123 | 0.208  | -0.352 | C |
| HETATM 429 | H | MOL | 1 | 12.366 | -0.838 | -0.553 | H |
| HETATM 430 | H | MOL | 1 | 12.336 | 0.771  | -1.266 | H |



|        |     |   |     |   |         |        |        |   |
|--------|-----|---|-----|---|---------|--------|--------|---|
| HETATM | 431 | H | MOL | 1 | 12.743  | 0.589  | 0.458  | H |
| HETATM | 432 | C | MOL | 1 | -1.905  | -0.561 | -0.251 | C |
| HETATM | 433 | O | MOL | 1 | -1.525  | 0.590  | 0.284  | O |
| HETATM | 434 | H | MOL | 1 | -0.530  | 0.703  | 0.190  | H |
| HETATM | 435 | O | MOL | 1 | -1.133  | -1.369 | -0.780 | O |
| HETATM | 436 | C | MOL | 1 | -3.350  | -0.837 | -0.185 | C |
| HETATM | 437 | C | MOL | 1 | -4.233  | 0.000  | 0.390  | C |
| HETATM | 438 | H | MOL | 1 | -3.637  | -1.777 | -0.645 | H |
| HETATM | 439 | H | MOL | 1 | -3.840  | 0.915  | 0.828  | H |
| HETATM | 440 | C | MOL | 1 | -5.683  | -0.176 | 0.488  | C |
| HETATM | 441 | C | MOL | 1 | -6.362  | -1.292 | -0.037 | C |
| HETATM | 442 | C | MOL | 1 | -6.441  | 0.823  | 1.126  | C |
| HETATM | 443 | C | MOL | 1 | -7.827  | 0.726  | 1.229  | C |
| HETATM | 444 | C | MOL | 1 | -7.744  | -1.401 | 0.060  | C |
| HETATM | 445 | C | MOL | 1 | -8.463  | -0.385 | 0.688  | C |
| HETATM | 446 | H | MOL | 1 | -5.934  | 1.689  | 1.541  | H |
| HETATM | 447 | H | MOL | 1 | -8.410  | 1.498  | 1.722  | H |
| HETATM | 448 | H | MOL | 1 | -5.807  | -2.083 | -0.532 | H |
| HETATM | 449 | H | MOL | 1 | -8.266  | -2.259 | -0.350 | H |
| HETATM | 450 | O | MOL | 1 | -9.854  | -0.514 | 0.833  | O |
| HETATM | 451 | C | MOL | 1 | -10.639 | -0.115 | -0.221 | C |
| HETATM | 452 | O | MOL | 1 | -10.170 | 0.348  | -1.236 | O |
| HETATM | 453 | C | MOL | 1 | -12.094 | -0.329 | 0.078  | C |
| HETATM | 454 | H | MOL | 1 | -12.279 | -1.372 | 0.347  | H |
| HETATM | 455 | H | MOL | 1 | -12.393 | 0.285  | 0.933  | H |
| HETATM | 456 | H | MOL | 1 | -12.692 | -0.059 | -0.792 | H |
| HETATM | 457 | H | MOL | 1 | -10.419 | 0.537  | 3.394  | H |

HETATM 458 H MOL 1 -8.436 1.299 4.603 H

CONNECT 1 2 6 7

CONNECT 2 3 30 1

CONNECT 3 39 4 2

CONNECT 4 34 5 3

CONNECT 5 4 8 6

CONNECT 6 5 233 1

CONNECT 7 1 235 17 234

CONNECT 8 237 5 12 236

CONNECT 9 10 33 14

CONNECT 10 57 11 9

CONNECT 11 35 12 10

CONNECT 12 11 8 13

CONNECT 13 12 14 238

CONNECT 14 9 13 20

CONNECT 15 16 29 19

CONNECT 16 15 45 220

CONNECT 17 7 220 18

CONNECT 18 17 19 239

CONNECT 19 15 18 21

CONNECT 20 14 241 25 240

CONNECT 21 19 243 27 244

CONNECT 22 23 28 27

CONNECT 23 51 24 22

CONNECT 24 32 25 23

CONNECT 25 20 24 26

CONNECT 26 25 27 242

CONNECT 27 26 21 22  
CONNECT 28 354 22  
CONNECT 29 15 354  
CONNECT 30 2 360  
CONNECT 31 360 220  
CONNECT 32 24 372  
CONNECT 33 9 372  
CONNECT 34 366 4  
CONNECT 35 366 11  
CONNECT 36 99 41 37  
CONNECT 37 245 38 36  
CONNECT 38 37 39 246  
CONNECT 39 38 40 3  
CONNECT 40 41 39 247  
CONNECT 41 36 248 40  
CONNECT 42 87 47 43  
CONNECT 43 42 249 44  
CONNECT 44 45 43 250  
CONNECT 45 46 16 44  
CONNECT 46 45 47 251  
CONNECT 47 252 46 42  
CONNECT 48 75 53 49  
CONNECT 49 48 50 253  
CONNECT 50 51 49 254  
CONNECT 51 23 52 50  
CONNECT 52 255 53 51  
CONNECT 53 52 256 48

CONNECT 54 63 59 55  
CONNECT 55 257 56 54  
CONNECT 56 55 258 57  
CONNECT 57 56 58 10  
CONNECT 58 57 59 259  
CONNECT 59 54 260 58  
CONNECT 60 69 61 65  
CONNECT 61 60 62  
CONNECT 62 61 261 63  
CONNECT 63 64 62 54  
CONNECT 64 65 262 63  
CONNECT 65 263 60 64  
CONNECT 66 264 67 71  
CONNECT 67 225 66 68  
CONNECT 68 67 69  
CONNECT 69 68 70 60  
CONNECT 70 71 265 69  
CONNECT 71 66 266 70  
CONNECT 72 81 77 73  
CONNECT 73 72 74  
CONNECT 74 75 73 267  
CONNECT 75 48 76 74  
CONNECT 76 77 268 75  
CONNECT 77 269 76 72  
CONNECT 78 79 270 83  
CONNECT 79 228 78 80  
CONNECT 80 81 79

CONNECT 81 80 82 72  
CONNECT 82 81 83 271  
CONNECT 83 78 272 82  
CONNECT 84 85 93 89  
CONNECT 85 86 84  
CONNECT 86 85 273 87  
CONNECT 87 86 42 88  
CONNECT 88 87 89 274  
CONNECT 89 84 275 88  
CONNECT 90 276 95 91  
CONNECT 91 90 277 92  
CONNECT 92 91 278 93  
CONNECT 93 84 92 94  
CONNECT 94 95 93  
CONNECT 95 94 90 218  
CONNECT 96 105 97 101  
CONNECT 97 96 279 98  
CONNECT 98 97 99 280  
CONNECT 99 100 98 36  
CONNECT 100 101 281 99  
CONNECT 101 96 100  
CONNECT 102 282 103 107  
CONNECT 103 102 222 104  
CONNECT 104 103 105  
CONNECT 105 106 96 104  
CONNECT 106 107 283 105  
CONNECT 107 102 106 284

CONNECT 108 114 113 109

CONNECT 109 108 138 110

CONNECT 110 109 111 147

CONNECT 111 112 110 142

CONNECT 112 111 113 115

CONNECT 113 285 108 112

CONNECT 114 286 287 125 108

CONNECT 115 288 112 289 119

CONNECT 116 121 117 141

CONNECT 117 118 116 165

CONNECT 118 117 119 143

CONNECT 119 115 120 118

CONNECT 120 290 119 121

CONNECT 121 120 128 116

CONNECT 122 127 123 137

CONNECT 123 124 122 153

CONNECT 124 125 139 123

CONNECT 125 126 124 114

CONNECT 126 125 291 127

CONNECT 127 126 122 129

CONNECT 128 292 133 293 121

CONNECT 129 296 295 127 135

CONNECT 130 135 136 131

CONNECT 131 130 132 159

CONNECT 132 133 131 140

CONNECT 133 134 132 128

CONNECT 134 294 135 133

CONNECT 135 129 130 134  
CONNECT 136 355 130  
CONNECT 137 355 122  
CONNECT 138 361 109  
CONNECT 139 124 361  
CONNECT 140 132 373  
CONNECT 141 116 373  
CONNECT 142 111 367  
CONNECT 143 367 118  
CONNECT 144 145 149 207  
CONNECT 145 297 146 144  
CONNECT 146 145 298 147  
CONNECT 147 146 110 148  
CONNECT 148 147 299 149  
CONNECT 149 144 148 300  
CONNECT 150 151 155 195  
CONNECT 151 152 301 150  
CONNECT 152 151 302 153  
CONNECT 153 152 154 123  
CONNECT 154 153 303 155  
CONNECT 155 150 154 304  
CONNECT 156 157 161 183  
CONNECT 157 158 305 156  
CONNECT 158 306 159 157  
CONNECT 159 160 158 131  
CONNECT 160 307 159 161  
CONNECT 161 160 308 156

CONNECT 162 163 167 171  
CONNECT 163 164 309 162  
CONNECT 164 310 165 163  
CONNECT 165 117 166 164  
CONNECT 166 457 165 167  
CONNECT 167 166 458 162  
CONNECT 168 173 169 177  
CONNECT 169 170 168  
CONNECT 170 171 311 169  
CONNECT 171 162 172 170  
CONNECT 172 171 312 173  
CONNECT 173 172 313 168  
CONNECT 174 179 175 314  
CONNECT 175 176 216 174  
CONNECT 176 177 175  
CONNECT 177 168 176 178  
CONNECT 178 177 315 179  
CONNECT 179 178 174 316  
CONNECT 180 185 181 189  
CONNECT 181 182 317 180  
CONNECT 182 183 318 181  
CONNECT 183 156 184 182  
CONNECT 184 319 185 183  
CONNECT 185 184 180  
CONNECT 186 191 187 320  
CONNECT 187 186 188 226  
CONNECT 188 189 187



CONNECT 189 190 180 188  
CONNECT 190 189 321 191  
CONNECT 191 322 190 186  
CONNECT 192 197 193 201  
CONNECT 193 194 192 323  
CONNECT 194 193 195 324  
CONNECT 195 196 194 150  
CONNECT 196 325 197 195  
CONNECT 197 196 192  
CONNECT 198 199 203 326  
CONNECT 199 200 327 198  
CONNECT 200 328 201 199  
CONNECT 201 200 202 192  
CONNECT 202 201 203  
CONNECT 203 198 202 223  
CONNECT 204 205 209 213  
CONNECT 205 329 206 204  
CONNECT 206 330 205 207  
CONNECT 207 144 206 208  
CONNECT 208 331 209 207  
CONNECT 209 208 204  
CONNECT 210 215 211 332  
CONNECT 211 212 210 333  
CONNECT 212 211 334 213  
CONNECT 213 204 214 212  
CONNECT 214 213 215  
CONNECT 215 219 214 210

CONNECT 216 230 175 335 336  
CONNECT 217 403 218 405 404  
CONNECT 218 338 337 95 217  
CONNECT 219 215 339 229 340  
CONNECT 220 31 17 16  
CONNECT 221 341 400 222 399  
CONNECT 222 343 103 342 221  
CONNECT 223 203 232 345 344  
CONNECT 224 385 386 225 384  
CONNECT 225 224 346 347 67  
CONNECT 226 187 349 231 348  
CONNECT 227 390 392 391 228  
CONNECT 228 350 351 227 79  
CONNECT 229 398 352 397 219  
CONNECT 230 216 406 408 407  
CONNECT 231 389 388 387 226  
CONNECT 232 382 383 353 223  
CONNECT 233 6  
CONNECT 234 7  
CONNECT 235 7  
CONNECT 236 8  
CONNECT 237 8  
CONNECT 238 13  
CONNECT 239 18  
CONNECT 240 20  
CONNECT 241 20  
CONNECT 242 26

CONNECT 243 21  
CONNECT 244 21  
CONNECT 245 37  
CONNECT 246 38  
CONNECT 247 40  
CONNECT 248 41  
CONNECT 249 43  
CONNECT 250 44  
CONNECT 251 46  
CONNECT 252 47  
CONNECT 253 49  
CONNECT 254 50  
CONNECT 255 52  
CONNECT 256 53  
CONNECT 257 55  
CONNECT 258 56  
CONNECT 259 58  
CONNECT 260 59  
CONNECT 261 62  
CONNECT 262 64  
CONNECT 263 65  
CONNECT 264 66  
CONNECT 265 70  
CONNECT 266 71  
CONNECT 267 74  
CONNECT 268 76  
CONNECT 269 77

CONNECT 270 78  
CONNECT 271 82  
CONNECT 272 83  
CONNECT 273 86  
CONNECT 274 88  
CONNECT 275 89  
CONNECT 276 90  
CONNECT 277 91  
CONNECT 278 92  
CONNECT 279 97  
CONNECT 280 98  
CONNECT 281 100  
CONNECT 282 102  
CONNECT 283 106  
CONNECT 284 107  
CONNECT 285 113  
CONNECT 286 114  
CONNECT 287 114  
CONNECT 288 115  
CONNECT 289 115  
CONNECT 290 120  
CONNECT 291 126  
CONNECT 292 128  
CONNECT 293 128  
CONNECT 294 134  
CONNECT 295 129  
CONNECT 296 129

CONNECT 297 145  
CONNECT 298 146  
CONNECT 299 148  
CONNECT 300 149  
CONNECT 301 151  
CONNECT 302 152  
CONNECT 303 154  
CONNECT 304 155  
CONNECT 305 157  
CONNECT 306 158  
CONNECT 307 160  
CONNECT 308 161  
CONNECT 309 163  
CONNECT 310 164  
CONNECT 311 170  
CONNECT 312 172  
CONNECT 313 173  
CONNECT 314 174  
CONNECT 315 178  
CONNECT 316 179  
CONNECT 317 181  
CONNECT 318 182  
CONNECT 319 184  
CONNECT 320 186  
CONNECT 321 190  
CONNECT 322 191  
CONNECT 323 193

CONNECT 324 194  
CONNECT 325 196  
CONNECT 326 198  
CONNECT 327 199  
CONNECT 328 200  
CONNECT 329 205  
CONNECT 330 206  
CONNECT 331 208  
CONNECT 332 210  
CONNECT 333 211  
CONNECT 334 212  
CONNECT 335 216  
CONNECT 336 216  
CONNECT 337 218  
CONNECT 338 218  
CONNECT 339 219  
CONNECT 340 219  
CONNECT 341 401 352 221  
CONNECT 342 222  
CONNECT 343 222  
CONNECT 344 223  
CONNECT 345 223  
CONNECT 346 225  
CONNECT 347 225  
CONNECT 348 226  
CONNECT 349 226  
CONNECT 350 228

CONNECT 351 228

CONNECT 352 341 402 229

CONNECT 353 232 385 395

CONNECT 354 356 357 28 29

CONNECT 355 137 136 358 359

CONNECT 356 354

CONNECT 357 354

CONNECT 358 355

CONNECT 359 355

CONNECT 360 30 363 362 31

CONNECT 361 139 138 365 364

CONNECT 362 360

CONNECT 363 360

CONNECT 364 361

CONNECT 365 361

CONNECT 366 369 368 35 34

CONNECT 367 142 370 371 143

CONNECT 368 366

CONNECT 369 366

CONNECT 370 367

CONNECT 371 367

CONNECT 372 374 375 33 32

CONNECT 373 140 376 377 141

CONNECT 374 372

CONNECT 375 372

CONNECT 376 373

CONNECT 377 373

CONNECT 378 379 381 411

CONNECT 379 380 378

CONNECT 380 379

CONNECT 381 378

CONNECT 382 232

CONNECT 383 232

CONNECT 384 224

CONNECT 385 353 396 224

CONNECT 386 224

CONNECT 387 231 394 390

CONNECT 388 231

CONNECT 389 231

CONNECT 390 387 393 227

CONNECT 391 227

CONNECT 392 227

CONNECT 393 390

CONNECT 394 387

CONNECT 395 353

CONNECT 396 385

CONNECT 397 229

CONNECT 398 229

CONNECT 399 221

CONNECT 400 221

CONNECT 401 341

CONNECT 402 352

CONNECT 403 409 407 217

CONNECT 404 217



CONNECT 405 217

CONNECT 406 230

CONNECT 407 403 230 410

CONNECT 408 230

CONNECT 409 403

CONNECT 410 407

CONNECT 411 378 412 413

CONNECT 412 414 411 415

CONNECT 413 411

CONNECT 414 412

CONNECT 415 412 417 416

CONNECT 416 415 423 419

CONNECT 417 421 418 415

CONNECT 418 417 422 420

CONNECT 419 416 424 420

CONNECT 420 418 419 425

CONNECT 421 417

CONNECT 422 418

CONNECT 423 416

CONNECT 424 419

CONNECT 425 420 426

CONNECT 426 425 427 428

CONNECT 427 426

CONNECT 428 429 430 431 426

CONNECT 429 428

CONNECT 430 428

CONNECT 431 428

CONNECT 432 436 435 433

CONNECT 433 432 434

CONNECT 434 433

CONNECT 435 432

CONNECT 436 432 438 437

CONNECT 437 440 436 439

CONNECT 438 436

CONNECT 439 437

CONNECT 440 441 442 437

CONNECT 441 444 448 440

CONNECT 442 443 446 440

CONNECT 443 445 447 442

CONNECT 444 449 445 441

CONNECT 445 444 450 443

CONNECT 446 442

CONNECT 447 443

CONNECT 448 441

CONNECT 449 444

CONNECT 450 451 445

CONNECT 451 453 452 450

CONNECT 452 451

CONNECT 453 451 454 456 455

CONNECT 454 453

CONNECT 455 453

CONNECT 456 453

CONNECT 457 166

CONNECT 458 167
